# Supplementary material for: Electrochemical synthesis of enaminones via a decarboxylative coupling reaction
Source: Royal Society of Chemistry journal article supplement (doi:10.1039/c9gc01098j), 2019-01-01

## Supporting information

### Electrochemical Synthesis of Enaminones via a Decarboxylative Coupling Reaction

Xianqiang Kong,<sup>a †</sup> Yulong Liu<sup>a †</sup>, Long Lin<sup>a</sup>, Qianjin Chen,<sup>a,\*</sup> Bo Xu<sup>a,\*</sup>

Key Laboratory of Science and Technology of Eco-Textiles, Ministry of Education, College of Chemistry, Chemical Engineering and Biotechnology, Donghua University, Shanghai 201620, China.

#### Table of Contents

|                                                                          |     |
|--------------------------------------------------------------------------|-----|
| Supporting information .....                                             | S1  |
| 1. General .....                                                         | S2  |
| 2. General procedures for synthesis of starting material .....           | S2  |
| 3. Optimization of reaction conditions with full details. ....           | S3  |
| 4. General procedure for electrochemical synthesis of enaminones 3. .... | S4  |
| 5. References .....                                                      | S24 |
| 6. Copies of NMR spectra .....                                           | S25 |

## 1. General

Commercial reagents and solvents were obtained from the commercial providers and used without further purification. The products were purified using a commercial flash chromatography system or a regular glass column. TLC was developed on silica gel 60 F254 glass plates.  $^1\text{H}$  NMR (600 MHz),  $^{13}\text{C}$  NMR (150 MHz) and  $^{19}\text{F}$  NMR (565 MHz) spectra were recorded on a Bruker NMR apparatus. The chemical shifts are reported in  $\delta$  (ppm) values ( $^1\text{H}$  and  $^{13}\text{C}$  NMR relative to  $\text{CHCl}_3$ ,  $\delta$  7.26 ppm for  $^1\text{H}$  NMR and  $\delta$  77.0 ppm for  $^{13}\text{C}$  NMR). Or alternatively,  $^1\text{H}$  NMR chemical shifts were referenced to tetramethylsilane signal (0 ppm). Multiplicities are recorded by s (singlet), d (doublet), t (triplet), q (quartet), p (pentet), h (hextet), m (multiplet) and br (broad). Coupling constants ( $J$ ), are reported in Hertz (Hz). Commercial reagents were used without any further purification.

## 2. General procedures for the synthesis of starting material

### 2.1 Preparation of azido alkenes <sup>2</sup>

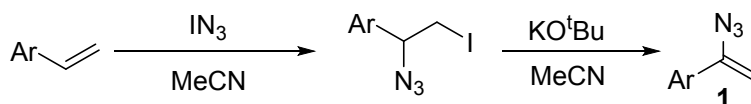

The azido alkenes **2** were prepared from the corresponding alkenes in the presence of  $\text{IN}_3$  by the known procedure.<sup>2</sup> To a stirred solution of  $\text{ICl}$  (2.2 mmol) in  $\text{MeCN}$  (4 mL) was added  $\text{NaN}_3$  (4 mmol) at rt, 1.5 h later, the reaction mixture was cooled to 0 °C, a solution of alkene (2 mmol) in  $\text{MeCN}$  (4 mL) was added. After 5 h later, the mixture was partitioned between ether and  $\text{H}_2\text{O}$ , the organic phase was separated, dried over  $\text{Na}_2\text{SO}_4$  and concentrated. The crude reaction mixture was dissolved in  $\text{Et}_2\text{O}$  (6 mL), then  $\text{KO}^t\text{Bu}$  (3.1 mmol) was added. The reaction mixture was stirred for 5 h at rt, then partitioned between ethyl acetate and  $\text{H}_2\text{O}$ , the organic phase was separated, dried over  $\text{Na}_2\text{SO}_4$  and concentrated. The residue was chromatographed to afford the azido alkene **1**.

Because organo azides are generally considered as unstable compounds, we conducted the thermogravimetry (TGA) and differential scanning calorimetry (DSC) of several the vinyl azide substrates (Figure S1). Vinyl azide substrates tended to decompose at above 90 °C. Therefore, the storage of **1** in a freezer is recommended. In our cases, **1** could be stored in a freezer (-20 °C) without detectable decomposition for several months. According to an early report on kinetics of thermolysis of vinyl azides (*J. Org. Chem.*, **1986**, 3176), thermolysis of vinyl azides gives 1-azirine as the product. For thermolysis of vinyl azide **1a**,  $\Delta\text{H} = 26.8$  kcal/mol,  $\Delta\text{G} = 27.3$  kcal/mol, the thermolysis process is an endothermic process.

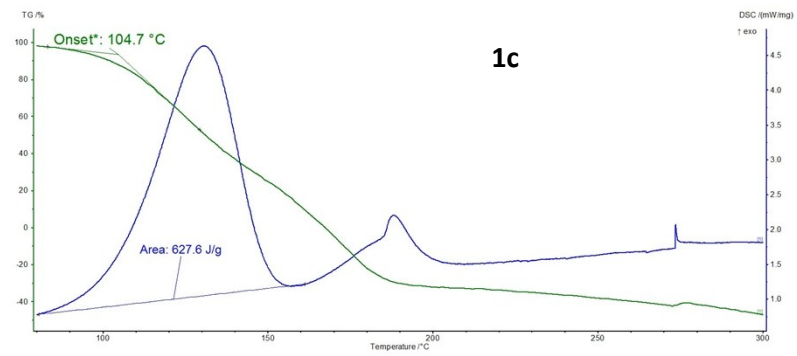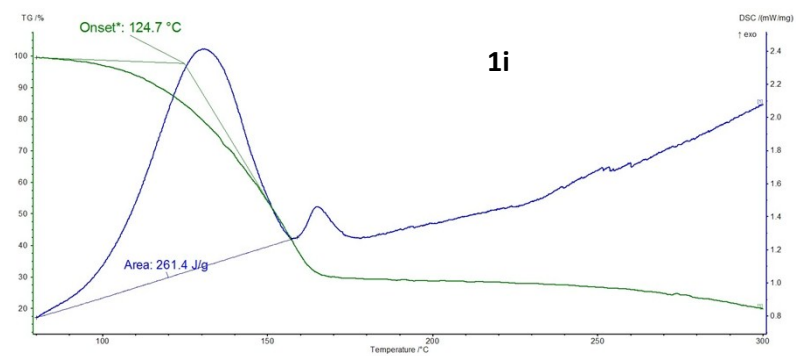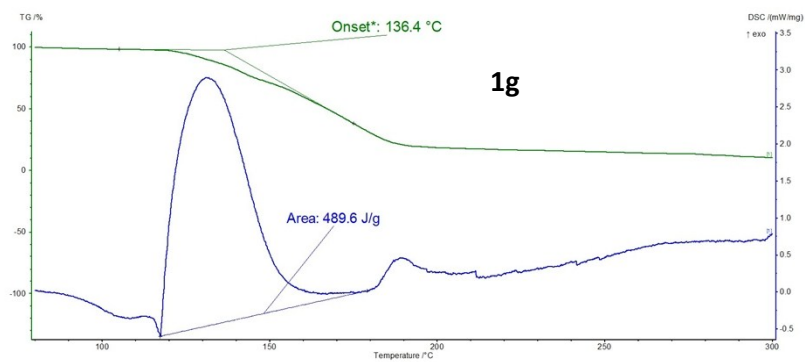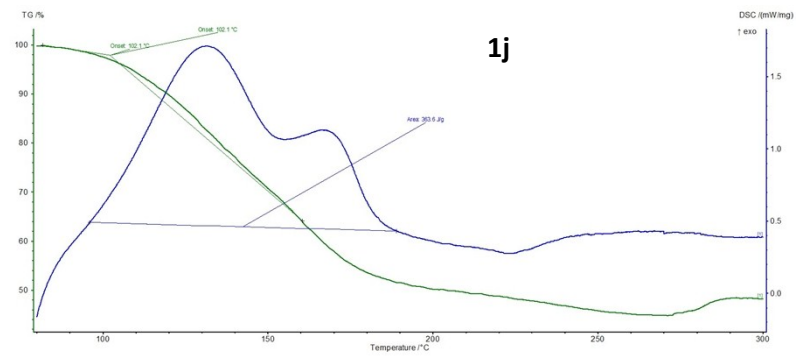

Figure S1. TGA-DSC of vinyl azides **1**.

## 2.2 Preparation of $\alpha$ -oxocarboxylic acids **2**<sup>1</sup>.

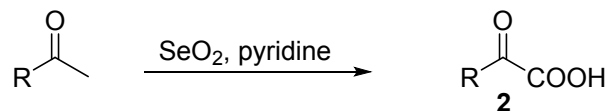

$\alpha$ -Oxocarboxylic acids **1** were prepared using a literature procedure (the oxidation of corresponding methyl ketones with SeO<sub>2</sub>).<sup>1</sup> Methyl ketone (5 mmol), SeO<sub>2</sub> (6 mmol), 20 mL of pyridine were added to a 50 mL round-bottom flask. The reaction mixture stirred at 110 °C for 1 h, then 90 °C for 4 h. the desired product were isolated by silica-gel column chromatography.

## 3. Optimization of reaction conditions with full details.

Table S1. Optimization of reaction conditions.

| entry | 1a:2a | anode<br>/cathode | additive/equiv             | J<br>(mA/cm <sup>2</sup> ) | temp/<br>°C | solvent | Yield (%) <sup>a</sup> |
|-------|-------|-------------------|----------------------------|----------------------------|-------------|---------|------------------------|
| 1     | 1:3   | Pt/Pt             | NH <sub>4</sub> I/0.15     | 3                          | 50          | MeCN    | 5                      |
| 2     | 1:3   | C/Pt              | NH <sub>4</sub> I/0.15     | 3                          | 50          | MeCN    | 19                     |
| 3     | 1:3   | Pt/C              | NH <sub>4</sub> I/0.15     | 3                          | 50          | MeCN    | 7                      |
| 4     | 1:3   | C/C               | NH <sub>4</sub> I/0.15     | 3                          | 50          | MeCN    | 11                     |
| 5     | 1:3   | C/Pt              | NH <sub>4</sub> Br/0.15    | 3                          | 50          | MeCN    | 7                      |
| 6     | 1:3   | C/Pt              | NaBr/0.15                  | 3                          | 50          | MeCN    | 6                      |
| 7     | 1:3   | C/Pt              | NaI/0.15                   | 3                          | 50          | MeCN    | 4                      |
| 8     | 1:3   | C/Pt              | n-Bu <sub>4</sub> NI/0.15  | 3                          | 50          | MeCN    | 35                     |
| 9     | 1:3   | C/Pt              | n-Bu <sub>4</sub> NBr/0.15 | 3                          | 50          | MeCN    | 9                      |
| 10    | 1:3   | C/Pt              | n-Bu <sub>4</sub> NI/0.10  | 3                          | 50          | MeCN    | 35                     |
| 11    | 1:3   | C/Pt              | n-Bu <sub>4</sub> NI/0.05  | 3                          | 50          | MeCN    | 36                     |
| 12    | 1:3   | C/Pt              | n-Bu <sub>4</sub> NI/0.04  | 3                          | 50          | MeCN    | 33                     |
| 13    | 1:3   | C/Pt              | n-Bu <sub>4</sub> NI/0.05  | 3                          | 50          | MeOH    | 21                     |

|    |     |      |                           |   |    |                               |                     |
|----|-----|------|---------------------------|---|----|-------------------------------|---------------------|
| 14 | 1:3 | C/Pt | n-Bu <sub>4</sub> NI/0.05 | 3 | 50 | EtOH                          | 24                  |
| 15 | 1:3 | C/Pt | n-Bu <sub>4</sub> NI/0.05 | 3 | 50 | DCE                           | 23                  |
| 16 | 1:3 | C/Pt | n-Bu <sub>4</sub> NI/0.05 | 3 | 50 | DMF                           | 5                   |
| 17 | 1:3 | C/Pt | n-Bu <sub>4</sub> NI/0.05 | 3 | 50 | Dioxane                       | 16                  |
| 18 | 1:3 | C/Pt | n-Bu <sub>4</sub> NI/0.05 | 3 | 50 | DMSO                          | 4                   |
| 19 | 1:3 | C/Pt | n-Bu <sub>4</sub> NI/0.05 | 3 | 50 | MeCN/H <sub>2</sub> O (2:1)   | 50                  |
| 20 | 1:3 | C/Pt | n-Bu <sub>4</sub> NI/0.05 | 3 | 50 | MeCN/ H <sub>2</sub> O (10:1) | 73                  |
| 20 | 1:3 | C/Pt | n-Bu <sub>4</sub> NI/0.05 | 3 | 50 | MeCN/ H <sub>2</sub> O (1:1)  | 31                  |
| 20 | 1:2 | C/Pt | n-Bu <sub>4</sub> NI/0.05 | 3 | 50 | MeCN/ H <sub>2</sub> O (10:1) | 74                  |
| 21 | 1:1 | C/Pt | n-Bu <sub>4</sub> NI/0.05 | 3 | 50 | MeCN/ H <sub>2</sub> O (10:1) | 36                  |
| 22 | 1:2 | C/Pt | n-Bu <sub>4</sub> NI/0.05 | 3 | 40 | MeCN/ H <sub>2</sub> O (10:1) | 89(83) <sup>b</sup> |
| 23 | 1:2 | C/Pt | n-Bu <sub>4</sub> NI/0.05 | 3 | 30 | MeCN/ H <sub>2</sub> O (10:1) | 62                  |
| 24 | 1:2 | C/Pt | n-Bu <sub>4</sub> NI/0.05 | 5 | 40 | MeCN/ H <sub>2</sub> O (10:1) | 54                  |
| 25 | 1:2 | C/Pt | n-Bu <sub>4</sub> NI/0.05 | 1 | 40 | MeCN/ H <sub>2</sub> O (10:1) | 62                  |
| 26 | 1:2 | C/Pt |                           | 3 | 40 | MeCN/ H <sub>2</sub> O (10:1) | Trace               |
| 27 | 1:2 |      | n-Bu <sub>4</sub> NI/0.05 |   | 40 | MeCN/ H <sub>2</sub> O (10:1) | NR                  |

<sup>a</sup> GC-MS yield using the dodecane as the internal standard. <sup>b</sup> Isolated yield. LiClO<sub>4</sub> (0.1 mol/L),

#### 4. General procedure for electrochemical synthesis of enaminones 3.

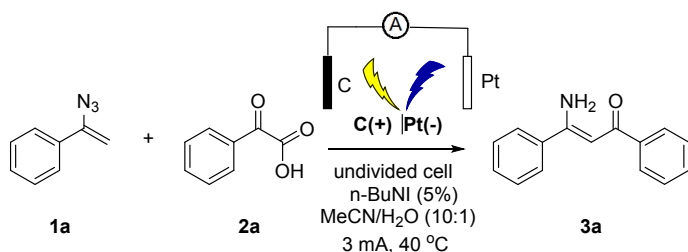

An undivided cell was equipped with a graphite felt (1×1 cm<sup>2</sup>) and a platinum plate (1×1 cm<sup>2</sup>) and connected to a DC regulated power supply. To the cell was added azido alkene **1** (0.2 mmol), *n*-Bu<sub>4</sub>NI (0.01 mmol) and 2 mL of

0.1 M LiClO<sub>4</sub>/(CH<sub>3</sub>CN:H<sub>2</sub>O = 10:1),  $\alpha$ -oxocarboxylic acid **2a** (60.00 mg, 0.4 mmol) were added. The mixture was electrolyzed using constant current conditions (~3 mA/cm<sup>2</sup>) at 40 ° C under magnetic stirring. When TLC analysis indicated that the electrolysis was complete (witnessed by the disappearance of the **2a**), the solvent was removed under reduced pressure. The residue was poured into a saturated aqueous solution of Na<sub>2</sub>S<sub>2</sub>O<sub>3</sub> and the product was then extracted with DCM (3×20 mL), dried over Na<sub>2</sub>SO<sub>4</sub>, and concentrated in vacuo. The residue was purified by column chromatography on silica gel using a mixture of petroleum ether/EtOAc (v : v = 5 : 1) as eluent to afford the desired pure product **3a**.

The graphite felt anode and Pt cathode could be reused for multiple times with similar chemical yields of **3a** after washed with water and acetone. The following is the the GC-yields of 3a after each reuse of cathodes.

| Cycles                | 1st | 2nd | 3rd | 4th |
|-----------------------|-----|-----|-----|-----|
| GC Yield of <b>3a</b> | 89% | 87% | 89% | 89% |

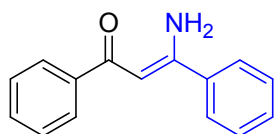

**3a**

(*Z*)-3-amino-1,3-diphenylprop-2-en-1-one (**3a**)<sup>3</sup>, CAS Number:14088-42-7, yellow oil, 37.0 mg, 83% yield. <sup>1</sup>H NMR (600 MHz, CDCl<sub>3</sub>)  $\delta$  10.43 (s, 1H), 7.95 (dd, *J* = 5.2, 3.3 Hz, 2H), 7.64 (dd, *J* = 8.1, 1.2 Hz, 2H), 7.51-7.42 (m, 6H), 6.15 (s, 1H), 5.55 (s, 1H). <sup>13</sup>C NMR (150 MHz, CDCl<sub>3</sub>)  $\delta$  190.2, 162.9, 140.4, 137.6, 131.1, 130.7, 129.0, 128.3, 127.2, 126.4, 91.9. HRMS (ESI) *m/z* Calcd. for C<sub>15</sub>H<sub>14</sub>NO [M+H]<sup>+</sup> : 224.1070, found : 224.1074.

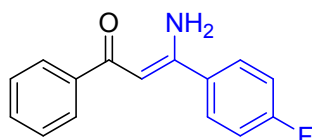

**3b**

(*Z*)-3-amino-3-(4-fluorophenyl)-1-phenylprop-2-en-1-one (**3b**)<sup>3</sup>, CAS Number:2087908-75-4, white solid, mp 86.5-87.5 °C, 37.6 mg, 78% yield. <sup>1</sup>H NMR (600 MHz, CDCl<sub>3</sub>)  $\delta$  10.42 (s, 1H), 7.97-7.95 (m, 2H), 7.67-7.63 (m,

2H), 7.51-7.48 (m, 1H), 7.47-7.44 (m, 2H), 7.19-7.15 (m, 2H), 6.11 (s, 1H), 5.53 (s, 1H).  $^{13}\text{C}$  NMR (150 MHz,  $\text{CDCl}_3$ )  $\delta$  190.15, 164.16 (d,  $J = 250.5$  Hz), 161.83, 140.22, 133.71 (d,  $J = 9.0$  Hz), 131.15, 128.44 (d,  $J = 9.0$  Hz), 128.34, 127.21, 116.1 (d,  $J = 22.5$  Hz), 91.91.  $^{19}\text{F}$  NMR (565 MHz,  $\text{CDCl}_3$ )  $\delta$  -109.36 - -109.40. HRMS (ESI)  $m/z$  Calcd. for  $\text{C}_{15}\text{H}_{13}\text{FNO}$   $[\text{M}+\text{H}]^+$ : 242.0981, found : 242.0984.

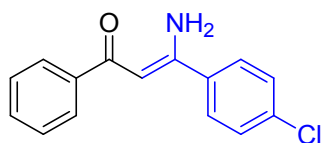

**3c**

(*Z*)-3-amino-3-(4-chlorophenyl)-1-phenylprop-2-en-1-one (**3c**)<sup>3</sup>, CAS Number:1770769-99-7, white solid, mp 93.5-95.5 °C, 38.0 mg, 74% yield.  $^1\text{H}$  NMR (600 MHz,  $\text{CDCl}_3$ )  $\delta$  10.39 (s, 1H), 7.96 – 7.95 (m, 2H), 7.60-7.59 (m, 2H), 7.51-7.49 (m, 1H), 7.47-7.45 (m, 4H), 6.12 (s, 1H), 5.49 (s, 1H).  $^{13}\text{C}$  NMR (150 MHz,  $\text{CDCl}_3$ )  $\delta$  190.3, 161.5, 140.1, 136.8, 136.0, 131.2, 129.3, 128.4, 127.7, 127.2, 92.0. HRMS (ESI)  $m/z$  Calcd. for  $\text{C}_{15}\text{H}_{13}\text{ClNO}$   $[\text{M}+\text{H}]^+$ : 258.0680, found : 258.0676.

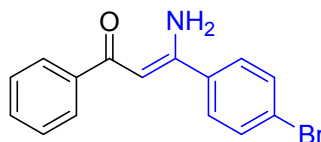

**3d**

(*Z*)-3-amino-3-(4-bromophenyl)-1-phenylprop-2-en-1-one (**3d**)<sup>3</sup>, CAS Number:1429508-71-3, white solid, mp 73.4-75.2 °C, 46.4 mg, 77% yield.  $^1\text{H}$  NMR (600 MHz,  $\text{CDCl}_3$ )  $\delta$  10.37 (s, 1H), 7.95-7.94 (m, 2H), 7.61 (d,  $J = 8.4$  Hz, 2H), 7.52 (d,  $J = 8.4$  Hz, 2H), 7.49 (d,  $J = 7.2$  Hz, 1H), 7.46 (t,  $J = 7.4$  Hz, 2H), 6.12 (s, 1H), 5.52 (s, 1H).  $^{13}\text{C}$  NMR (150 MHz,  $\text{CDCl}_3$ )  $\delta$  190.3, 161.6, 140.1, 136.5, 132.3, 131.2, 128.4, 128.0, 127.2, 125.0, 92.0. HRMS (ESI)  $m/z$  Calcd. for  $\text{C}_{15}\text{H}_{13}\text{BrNO}$   $[\text{M}+\text{H}]^+$ : 302.0175, found : 302.0182.  $^1\text{H}$  NMR (600 MHz,  $\text{CDCl}_3$ )  $\delta$  10.35 (s, 1H), 7.96 – 7.91 (m, 2H), 7.85 – 7.80 (m, 2H), 7.50 – 7.46 (m, 1H), 7.44 (dd,  $J = 8.2, 6.5$  Hz, 2H), 7.39 – 7.35 (m, 2H), 6.10 (s, 1H), 5.34 (s, 1H).

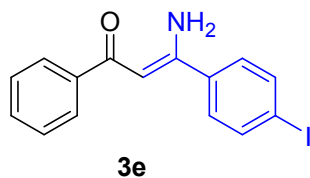

(Z)-3-amino-1-phenyl-3-(p-tolyl)prop-2-en-1-one (**3e**)<sup>4</sup>, CAS Number: 2286457-53-0, white solid, mp 109-111 °C, 34.1 mg, 49% yield. <sup>1</sup>H NMR (600 MHz, CDCl<sub>3</sub>) δ 10.35 (s, 1H), 7.96 – 7.91 (m, 2H), 7.85 – 7.80 (m, 2H), 7.50 – 7.46 (m, 1H), 7.44 (dd, *J* = 8.2, 6.5 Hz, 2H), 7.39 – 7.35 (m, 2H), 6.10 (s, 1H), 5.34 (s, 1H). <sup>13</sup>C NMR (150 MHz, CDCl<sub>3</sub>) δ 190.4, 161.6, 140.1, 138.3, 137.1, 131.3, 128.4, 128.0, 127.2, 97.0, 92.0. HRMS (ESI) *m/z* Calcd. for C<sub>15</sub>H<sub>13</sub>INO [M+H]<sup>+</sup>: 350.0042, found: 350.0045.

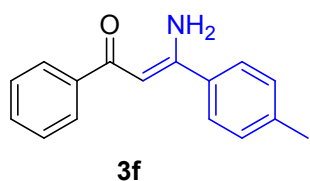

(Z)-3-amino-1-phenyl-3-(p-tolyl)prop-2-en-1-one (**3f**)<sup>3</sup>, CAS Number: 2087908-73-2, white solid, mp 92-94 °C, 38.4 mg, 81% yield. <sup>1</sup>H NMR (600 MHz, CDCl<sub>3</sub>) δ 10.47 (s, 1H), 7.98-7.96 (m, 2H), 7.56 (d, *J* = 8.1 Hz, 2H), 7.50-7.44 (m, 3H), 7.31-7.28 (m, 2H), 6.17 (s, 1H), 5.47 (s, 1H), 2.45 (s, 3H). <sup>13</sup>C NMR (150 MHz, CDCl<sub>3</sub>) δ 190.1, 162.9, 141.2, 140.5, 134.6, 131.0, 129.7, 128.3, 127.2, 126.2, 91.5, 21.40. HRMS (ESI) *m/z* Calcd. for C<sub>16</sub>H<sub>15</sub>NO [M+H]<sup>+</sup>: 238.1226, found: 238.1229.

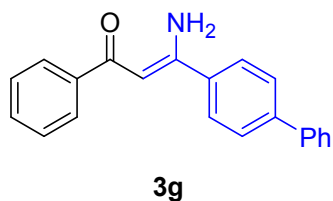

(Z)-3-([1,1'-biphenyl]-4-yl)-3-amino-1-phenylprop-2-en-1-one (**3g**)<sup>5</sup>, CAS Number: 2143120-79-8, white solid, mp 97 - 99 °C, 50.2 mg, 84% yield. <sup>1</sup>H NMR (600 MHz, CDCl<sub>3</sub>) δ 10.48 (s, 1H), 7.99 (dd, *J* = 8.0, 1.3 Hz, 2H), 7.72-7.68 (m, 4H), 7.64-7.63 (m, 2H), 7.50-7.44 (m, 5H), 7.41 (t, *J* = 7.4 Hz, 1H), 6.23 (s, 1H), 5.64 (s, 1H). <sup>13</sup>C NMR (150 MHz, CDCl<sub>3</sub>) δ 190.1, 162.5, 143.6, 140.4, 140.0, 136.2, 131.1, 129.0, 128.4, 128.0, 127.7, 127.3, 127.2, 126.9, 91.8. HRMS (ESI) *m/z* Calcd. for C<sub>21</sub>H<sub>18</sub>NO [M+H]<sup>+</sup>: 300.1388; found: 300.1394.



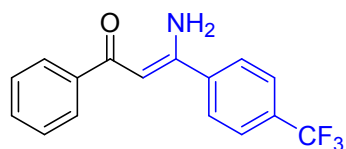

**3h**

(Z)-3-amino-1-phenyl-3-(4-(trifluoromethyl)phenyl)prop-2-en-1-one(**3h**)<sup>3</sup>, CAS Number:1427296-15-8, white solid, mp 74-76 °C, 40.2 mg, 69% yield. <sup>1</sup>H NMR (600 MHz, CDCl<sub>3</sub>) δ 10.34 (s, 1H), 7.93 (dd, *J* = 5.2, 3.4 Hz, 2H), 7.76-7.72 (m, 4H), 7.50-7.48 (m, 1H), 7.44 (dd, *J* = 10.1, 4.6 Hz, 2H), 6.13 (s, 1H), 5.44 (s, 1H). <sup>13</sup>C NMR (150 MHz, CDCl<sub>3</sub>) δ 190.52, 161.01, 141.16, 139.94, 132.49 (q, *J* = 33Hz), 131.38, 128.40, 127.25, 126.92, 126.05 (q, *J* = 3Hz), 123.70 (q, *J* = 270Hz), 92.63. <sup>19</sup>F NMR (565 MHz, CDCl<sub>3</sub>) δ -62.84. HRMS (ESI) *m/z* Calcd. for C<sub>16</sub>H<sub>12</sub>F<sub>3</sub>NNaO [M+Na]<sup>+</sup> : 314.0763, found : 314.0766.

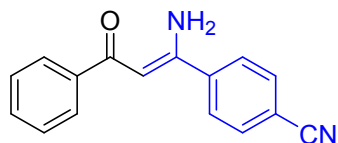

**3i**

(Z)-4-(1-amino-3-oxo-3-phenylprop-1-en-1-yl)benzonitrile (**3i**)<sup>5</sup>, CAS Number: 2143120-80-1, white solid, mp 83-85 °C, 35.2 mg, 71% yield. <sup>1</sup>H NMR (600 MHz, CDCl<sub>3</sub>) δ 10.10 (d, *J* = 236.5 Hz, 1H), 7.93-7.92 (m, 2H), 7.75 (td, *J* = 8.4, 6.5 Hz, 4H), 7.51-7.49 (m, 1H), 7.45 (t, *J* = 7.4 Hz, 2H), 6.12 (s, 1H), 5.36 (s, 1H). <sup>13</sup>C NMR (150 MHz, CDCl<sub>3</sub>) δ 190.6, 160.2, 142.0, 139.8, 132.8, 131.5, 128.4, 127.3, 127.2, 118.0, 114.3, 92.9. HRMS (ESI) *m/z* Calcd. for C<sub>16</sub>H<sub>12</sub>N<sub>2</sub>ONa [M+Na]<sup>+</sup>: 271.0847, found: 271.0852.

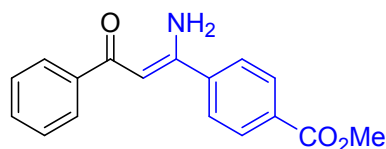

**3j**

(Z)-methyl 4-(1-amino-3-oxo-3-phenylprop-1-en-1-yl)benzoate (**3j**)<sup>5</sup>, CAS Number: 2143120-81-2, white solid, mp 106-107 °C, 36.6 mg, 65% yield. <sup>1</sup>H NMR (600 MHz, CDCl<sub>3</sub>) δ 10.35 (s, 1H), 8.11 (d, *J* = 8.3 Hz, 2H), 7.94-7.93 (m, 2H), 7.69 (d, *J* = 8.3 Hz, 2H), 7.49-7.46 (m, 1H), 7.43 (t, *J* = 7.4 Hz, 2H), 6.15 (s, 1H), 5.57 (s, 1H), 3.94 (s, 3H). <sup>13</sup>C NMR (150 MHz, CDCl<sub>3</sub>) δ 190.4, 166.3, 161.5, 141.8, 140.1, 132.0, 131.3, 130.2, 128.4, 127.3, 126.5, 92.5, 52.4. HRMS (ESI) *m/z* Calcd. for C<sub>17</sub>H<sub>15</sub>NO<sub>3</sub>Na [M+Na]<sup>+</sup> : 304.0950, found : 304.0952.

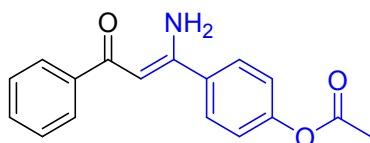

**3k**

(Z)-4-(1-amino-3-oxo-3-phenylprop-1-en-1-yl)phenyl acetate (**3k**), yellow oil, 42.2 mg, 75% yield. <sup>1</sup>H NMR (600 MHz, CDCl<sub>3</sub>) δ 10.38 (s, 1H), 7.98-7.95 (m, 2H), 7.69-7.67 (m, 2H), 7.50 (ddd, *J* = 6.1, 3.5, 1.3 Hz, 1H), 7.46-7.44 (m, 2H), 7.24-7.21 (m, 2H), 6.14 (s, 1H), 5.53 (s, 1H), 2.36 (s, 3H). <sup>13</sup>C NMR (150 MHz, CDCl<sub>3</sub>) δ 190.2, 169.2, 161.9, 152.4, 140.2, 135.3, 131.1, 128.3, 127.7, 127.2, 122.3, 92.0, 21.1. HRMS (ESI) *m/z* Calcd. for C<sub>17</sub>H<sub>15</sub>NNaO<sub>3</sub> [M+Na]<sup>+</sup> : 304.0950, found : 304.0951.

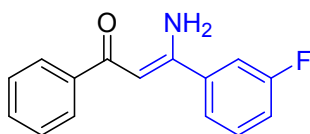

**3l**

(Z)-3-amino-3-(3-fluorophenyl)-1-phenylprop-2-en-1-one (**3l**)<sup>3</sup>, CAS Number: 2087908-78-7, yellow oil, 35.2 mg, 73% yield. <sup>1</sup>H NMR (600 MHz, CDCl<sub>3</sub>) δ 10.34 (s, 1H), 7.93 (dd, *J* = 5.2, 3.4 Hz, 2H), 7.48 (ddd, *J* = 6.2, 3.6, 1.3 Hz, 1H), 7.45-7.41 (m, 4H), 7.35-7.31 (m, 1H), 7.20-7.17 (m, 1H), 6.12 (s, 1H), 5.54 (s, 1H). <sup>13</sup>C NMR (150 MHz, CDCl<sub>3</sub>) δ 190.38, 162.89 (d, *J* = 246 Hz), 161.33 (d, *J* = 3 Hz), 140.08, 139.82 (d, *J* = 0.5 Hz), 131.25, 130.75 (d, *J* = 7.5 Hz), 128.36, 127.24, 122.09 (d, *J* = 3 Hz), 117.60 (d, *J* = 21 Hz), 113.61 (d, *J* = 22.5 Hz), 92.11. <sup>19</sup>F NMR (565 MHz, CDCl<sub>3</sub>) δ -111.40 - -111.44. HRMS (ESI) *m/z* Calcd. for C<sub>15</sub>H<sub>13</sub>FNO [M+H]<sup>+</sup> : 242.0976, found : 242.0982

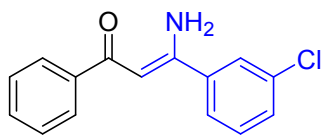

**3m**

(*Z*)-3-amino-3-(3-chlorophenyl)-1-phenylprop-2-en-1-one (**3m**)<sup>3</sup>, CAS Number: 2087908-79-8, yellow oil, 39.1 mg, 70% yield. <sup>1</sup>H NMR (600 MHz, CDCl<sub>3</sub>) δ 10.33 (s, 1H), 7.94-7.93 (m, 2H), 7.61 (t, *J* = 1.8 Hz, 1H), 7.50 (t, *J* = 6.3 Hz, 1H), 7.48-7.42 (m, 4H), 7.39 (t, *J* = 7.8 Hz, 1H), 6.10 (s, 1H), 5.50 (s, 1H). <sup>13</sup>C NMR (150 MHz, CDCl<sub>3</sub>) δ 190.4, 161.2, 140.0, 139.4, 135.0, 131.3, 130.7, 130.4, 128.4, 127.3, 126.7, 124.6, 92.2. HRMS (ESI) *m/z* Calcd. for C<sub>15</sub>H<sub>13</sub>ClNO [M+H]<sup>+</sup>: 258.0680, found: 258.0686.

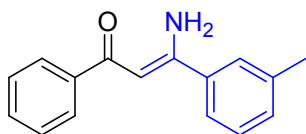

**3n**

(*Z*)-3-amino-1-phenyl-3-(*m*-tolyl)prop-2-en-1-one (**3n**)<sup>3</sup>, CAS Number: 2087908-77-6, white solid, mp 50-52 °C, 38.4 mg, 81% yield. <sup>1</sup>H NMR (600 MHz, CDCl<sub>3</sub>) δ 10.43 (s, 1H), 7.95 (dd, *J* = 5.2, 3.3 Hz, 2H), 7.48-7.42 (m, 5H), 7.36 (t, *J* = 7.8 Hz, 1H), 7.31 (d, *J* = 7.6 Hz, 1H), 6.14 (s, 1H), 5.49 (s, 1H), 2.43 (s, 3H). <sup>13</sup>C NMR (150 MHz, CDCl<sub>3</sub>) δ 190.1, 163.1, 140.4, 138.9, 137.6, 131.5, 131.0, 129.0, 128.3, 127.2, 127.0, 123.5, 91.8, 21.5. HRMS (ESI) *m/z* Calcd. for C<sub>16</sub>H<sub>15</sub>NO [M+H]<sup>+</sup>: 238.1226, found: 238.1221.

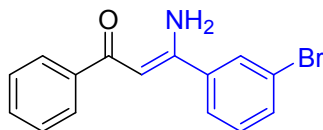

**3o**

(Z)-3-amino-3-(3-bromophenyl)-1-phenylprop-2-en-1-one (**3o**)<sup>7</sup>, CAS Number: 261730-42-1, white solid, mp 76-78 °C, 44.5 mg, 74% yield. <sup>1</sup>H NMR (600 MHz, CDCl<sub>3</sub>) δ 10.32 (s, 1H), 7.93 (dd, *J* = 5.2, 3.3 Hz, 2H), 7.77 (t, *J* = 1.8 Hz, 1H), 7.61 (dd, *J* = 8.0, 0.8 Hz, 1H), 7.56-7.53 (m, 1H), 7.48 (ddd, *J* = 6.2, 3.6, 1.3 Hz, 1H), 7.45-7.42 (m, 2H), 7.33 (t, *J* = 7.9 Hz, 1H), 6.09 (s, 1H), 5.47 (s, 1H). <sup>13</sup>C NMR (150 MHz, CDCl<sub>3</sub>) δ 190.4, 161.1, 140.0, 139.7, 133.6, 131.3, 130.6, 129.5, 128.4, 127.3, 125.0, 123.1, 92.2. HRMS (ESI) *m/z* Calcd. for C<sub>15</sub>H<sub>13</sub>BrNO [M+H]<sup>+</sup>: 302.0175, found: 302.0180.

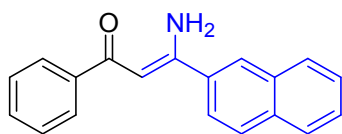

**3p**

(Z)-3-amino-3-(naphthalen-2-yl)-1-phenylprop-2-en-1-one (**3p**)<sup>3</sup>, CAS Number: 2087908-82-3, white solid, mp 86-88 °C, 48.6 mg, 89% yield. <sup>1</sup>H NMR (600 MHz, CDCl<sub>3</sub>) δ 10.51 (s, 1H), 8.12 (s, 1H), 8.00-7.99 (m, 2H), 7.92 (dd, *J* = 8.8, 3.9 Hz, 2H), 7.90-7.88 (m, 1H), 7.70 (dd, *J* = 8.5, 1.7 Hz, 1H), 7.58-7.55 (m, 2H), 7.50-7.44 (m, 3H), 6.28 (s, 1H). <sup>13</sup>C NMR (150 MHz, CDCl<sub>3</sub>) δ 190.1, 162.9, 140.4, 134.8, 134.3, 133.0, 131.1, 129.0, 128.6, 128.4, 128.3, 127.8, 127.4, 127.3, 1267.0, 126.2, 123.5, 92.3. HRMS (ESI) *m/z* Calcd. for C<sub>19</sub>H<sub>16</sub>NO [M+H]<sup>+</sup>: 274.1226, found: 274.1228.

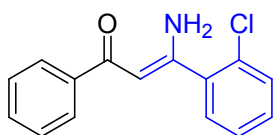

**3q**

(Z)-3-amino-3-(2-chlorophenyl)-1-phenylprop-2-en-1-one (**3q**), white solid, mp 131-132 °C, 36.0 mg, 70% yield. <sup>1</sup>H NMR (600 MHz, CDCl<sub>3</sub>) δ 10.37 (s, 1H), 7.94-7.92 (m, 2H), 7.58-7.56 (m, 2H), 7.49-7.47 (m, 1H), 7.45-7.43 (m, 4H), 6.10 (s, 1H), 5.46 (s, 1H). <sup>13</sup>C NMR (150 MHz, CDCl<sub>3</sub>) δ 190.3, 161.5, 140.1, 136.8, 136.0, 131.2, 129.3, 128.4, 127.7, 127.2, 92.0. HRMS (ESI) *m/z* Calcd. for C<sub>15</sub>H<sub>13</sub>ClNO [M+H]<sup>+</sup>: 258.0680, found: 258.0681.

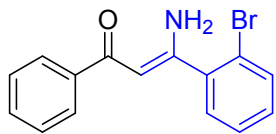

**3r**

(*Z*)-3-amino-3-(2-bromophenyl)-1-phenylprop-2-en-1-one (**3r**), white solid, mp 126-128 °C, 44.1 mg, 73% yield. <sup>1</sup>H NMR (600 MHz, CDCl<sub>3</sub>) δ 10.30 (s, 1H), 7.94-7.91 (m, 2H), 7.66 (dd, *J* = 8.0, 0.9 Hz, 1H), 7.45-7.37 (m, 5H), 7.30 (td, *J* = 7.8, 1.7 Hz, 1H), 5.89 (s, 1H), 5.31 (s, 1H). <sup>13</sup>C NMR (150 MHz, CDCl<sub>3</sub>) δ 190.4, 161.98, 139.9, 138.7, 133.6, 131.2, 130.8, 129.9, 128.3, 127.6, 127.3, 120.7, 94.2. HRMS (ESI) *m/z* Calcd. for C<sub>15</sub>H<sub>13</sub>BrNO [M+H]<sup>+</sup>: 302.0175, found: 302.0177.

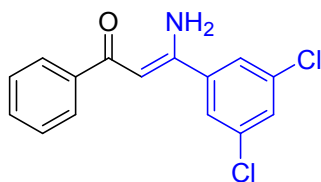

**3s**

(*Z*)-3-amino-3-(3,5-dichlorophenyl)-1-phenylprop-2-en-1-one (**3s**), white solid, mp 165-167 °C, 44.8 mg, 77% yield. <sup>1</sup>H NMR (600 MHz, CDCl<sub>3</sub>) δ 10.24 (s, 1H), 7.92-7.91 (m, 2H), 7.49 (q, *J* = 2.5 Hz, 3H), 7.50-7.48 (m, 3H), 6.06 (s, 1H), 5.46 (s, 1H). <sup>13</sup>C NMR (150 MHz, CDCl<sub>3</sub>) δ 190.6, 159.7, 140.6, 139.8, 135.8, 131.5, 130.4, 128.4, 127.3, 125.1, 92.5. HRMS (ESI) *m/z* Calcd. for C<sub>15</sub>H<sub>12</sub>Cl<sub>2</sub>NO [M+H]<sup>+</sup>: 292.0296, Found : 292.0301.

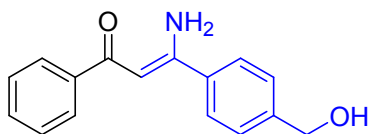

**3t**

(*Z*)-3-amino-3-(4-(hydroxymethyl)phenyl)-1-phenylprop-2-en-1-one(**3t**), white solid, mp 106-107 °C, 50.0 mg, 83%. yield. <sup>1</sup>H NMR (600 MHz, CDCl<sub>3</sub>) δ 10.45 (s, 1H), 7.99 – 7.94 (m, 2H), 7.71 – 7.65 (m, 2H), 7.51 (d, *J* =

7.7 Hz, 2H), 7.49 – 7.44 (m, 3H), 6.18 (s, 1H), 5.46 (s, 1H), 4.81 (d,  $J = 5.7$  Hz, 2H).  $^{13}\text{C}$  NMR (150 MHz,  $\text{CDCl}_3$ )  $\delta$  190.2, 162.5, 143.7, 140.3, 136.8, 131.1, 128.3, 127.4, 127.2, 126.6, 91.9, 64.7. HRMS (ESI)  $m/z$  Calcd. for  $\text{C}_{16}\text{H}_{16}\text{NO}_2$   $[\text{M}+\text{H}]^+$ : 254.1181, Found : 254.1187.

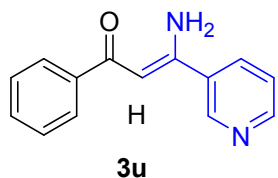

(*Z*)-3-amino-1-phenyl-3-(pyridin-3-yl)prop-2-en-1-one (**3u**)<sup>5</sup>, CAS Number: 1770770-12-1, oil, 31.9 mg, 71% yield.  $^1\text{H}$  NMR (600 MHz,  $\text{CDCl}_3$ )  $\delta$  10.35 (s, 1H), 8.93 (d,  $J = 2.3$  Hz, 1H), 8.76 (dd,  $J = 4.9, 1.6$  Hz, 1H), 8.00 – 7.91 (m, 3H), 7.54 – 7.50 (m, 1H), 7.49 – 7.47 (m, 2H), 7.47 – 7.43 (m, 1H), 6.15 (s, 1H), 5.42 (s, 1H).  $^{13}\text{C}$  NMR (150 MHz,  $\text{CDCl}_3$ )  $\delta$  190.5, 159.5, 151.6, 147.6, 139.9, 133.9, 133.5, 131.4, 128.4, 127.3, 123.7, 92.7. HRMS (ESI)  $m/z$  Calcd. for  $\text{C}_{14}\text{H}_{13}\text{N}_2\text{O}$   $[\text{M}+\text{H}]^+$ : 225.1028, Found : 225.1031.

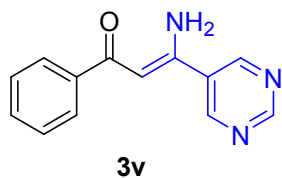

(*Z*)-3-amino-1-phenyl-3-(pyrimidin-5-yl)prop-2-en-1-one (**3v**), white solid, mp 58-60 °C, 31.2mg, 69% yield.  $^1\text{H}$  NMR (600 MHz,  $\text{CDCl}_3$ )  $\delta$  10.25 (s, 1H), 9.36 (s, 1H), 9.03 (s, 2H), 8.03 – 7.92 (m, 2H), 7.57 – 7.52 (m, 1H), 7.49 (dd,  $J = 8.2, 6.7$  Hz, 2H), 6.14 (s, 1H), 5.59 – 5.14 (m, 1H).  $^{13}\text{C}$  NMR (150 MHz,  $\text{CDCl}_3$ )  $\delta$  160.1, 155.8, 154.7, 139.4, 131.8, 131.6, 128.5, 127.3, 93.4. HRMS (ESI)  $m/z$  Calcd. for  $\text{C}_{13}\text{H}_{12}\text{N}_3\text{O}$   $[\text{M}+\text{H}]^+$ : 226.0980, Found : 226.0977.

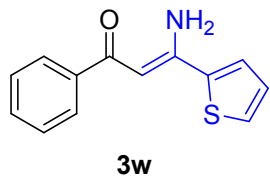

(*Z*)-3-amino-1-phenyl-3-(thiophen-2-yl)prop-2-en-1-one (**3w**)<sup>3</sup>, CAS Number: 1456785-15-1, oil, 35.7 mg, 78% yield. <sup>1</sup>H NMR (600 MHz, CDCl<sub>3</sub>) δ 10.36 (s, 1H), 8.02 – 7.91 (m, 2H), 7.57 – 7.44 (m, 5H), 7.17 (dd, *J* = 5.0, 3.7 Hz, 1H), 6.29 (s, 1H), 5.37 (s, 1H). <sup>13</sup>C NMR (150 MHz, CDCl<sub>3</sub>) δ 190.2, 155.1, 140.1, 139.9, 131.2, 128.3, 128.2, 127.2, 126.5, 91.4. HRMS (ESI) *m/z* Calcd. for C<sub>13</sub>H<sub>12</sub>NOS [M+H]<sup>+</sup>: 230.0640, Found : 230.0642.

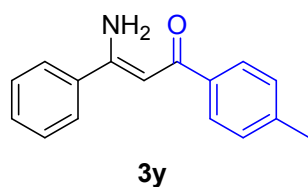

(*Z*)-3-amino-3-phenyl-1-(*p*-tolyl)prop-2-en-1-one (**3y**)<sup>3</sup>, CAS Number: 1427296-04-5, white solid, mp 76-77 °C, 37.9 mg, 80% yield. <sup>1</sup>H NMR (600 MHz, CDCl<sub>3</sub>) δ 10.39 (s, 1H), 7.86 (d, *J* = 8.1 Hz, 2H), 7.64 (dt, *J* = 3.6, 2.1 Hz, 2H), 7.51 – 7.45 (m, 3H), 7.24 (d, *J* = 8.1 Hz, 2H), 6.14 (s, 1H), 5.47 (s, 1H), 2.40 (s, 3H). <sup>13</sup>C NMR (150 MHz, CDCl<sub>3</sub>) δ 190.0, 162.6, 141.5, 137.7, 137.7, 130.6, 129.0, 129.0, 127.3, 126.4, 91.8, 21.5. HRMS (ESI) *m/z* Calcd. for C<sub>16</sub>H<sub>15</sub>NNaO [M+Na]<sup>+</sup>: 260.1046; found: 260.1048.

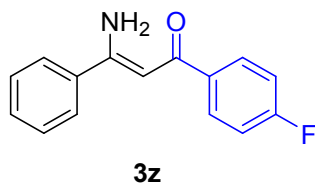

(*Z*)-3-amino-1-(4-fluorophenyl)-3-phenylprop-2-en-1-one (**3z**)<sup>3</sup>, CAS Number: 1427296-08-9, white solid, mp 72-74 °C, 34.1 mg, 71% yield. *N*-(5-iodo-2-(1-(methoxyimino)ethyl)phenyl)-4-methylbenzamide. <sup>1</sup>H NMR (600 MHz, CDCl<sub>3</sub>) δ 10.39 (s, 1H), 7.97-7.94 (m, 2H), 7.63-7.62 (m, 2H), 7.52-7.45 (m, 3H), 7.12-7.08 (m, 2H), 6.09 (s, 1H), 5.54 (s, 1H). <sup>13</sup>C NMR (150 MHz, CDCl<sub>3</sub>) δ 188.63, 164.62 (d, *J* = 250.5 Hz), 163.12, 137.52, 136.54 (d,

$J = 3.0$  Hz), 130.80, 129.50 (d,  $J = 9.0$  Hz), 129.07, 126.35, 115.17 (d,  $J = 21.0$  Hz), 91.49.  $^{19}\text{F}$  NMR (565 MHz,  $\text{CDCl}_3$ )  $\delta$  -109.25 - -109.28. HRMS(ESI)  $m/z$  Calcd. for  $\text{C}_{15}\text{H}_{12}\text{FNNaO}$   $[\text{M}+\text{Na}]^+$ : 264.0795, found : 264.0799.

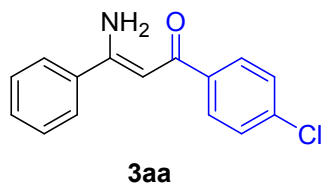

(*Z*)-3-amino-1-(4-chlorophenyl)-3-phenylprop-2-en-1-one (**3aa**)<sup>3</sup>, CAS Number: 1427296-09-0, white solid, mp 76-78 °C, 38.0 mg, 74% yield.  $^1\text{H}$  NMR (600 MHz,  $\text{CDCl}_3$ )  $\delta$  10.42 (s, 1H), 7.89 - 7.87 (m, 2H), 7.63-7.61 (m, 2H), 7.50 (ddd,  $J = 6.1, 3.5, 1.3$  Hz, 1H), 7.48-7.45 (m, 2H), 7.40-7.38 (m, 2H), 6.08 (s, 1H), 5.60 (s, 1H).  $^{13}\text{C}$  NMR (150 MHz,  $\text{CDCl}_3$ )  $\delta$  188.6, 163.4, 138.7, 137.4, 137.1, 130.9, 129.1, 128.6, 128.5, 126.4, 91.5. HRMS (ESI)  $m/z$  Calcd. for  $\text{C}_{15}\text{H}_{12}\text{ClNNaO}$   $[\text{M}+\text{Na}]^+$ : 280.0500, found: 280.0502.

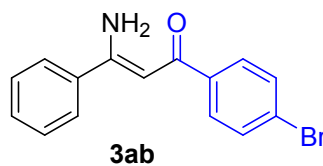

(*Z*)-3-amino-1-(4-bromophenyl)-3-phenylprop-2-en-1-one (**3ab**)<sup>3</sup>, CAS Number: 2119546-26-6, white solid, mp 76-78 °C, 43.3 mg, 72% yield.  $^1\text{H}$  NMR (600 MHz,  $\text{CDCl}_3$ )  $\delta$  10.43 (s, 0H), 7.81 (d,  $J = 8.5$  Hz, 2H), 7.63-7.61 (m, 2H), 7.55 (d,  $J = 8.5$  Hz, 2H), 7.52-7.49 (m, 1H), 7.47 (t,  $J = 7.3$  Hz, 2H), 6.08 (s, 1H), 5.60 (s, 1H).  $^{13}\text{C}$  NMR (150 MHz,  $\text{CDCl}_3$ )  $\delta$  188.7, 163.4, 139.1, 137.4, 131.5, 130.9, 129.1, 128.9, 126.4, 125.7, 91.5. HRMS (ESI)  $m/z$  Calcd. for  $\text{C}_{15}\text{H}_{12}\text{BrNNaO}$   $[\text{M}+\text{Na}]^+$ : 323.9994, found : 323.9999.



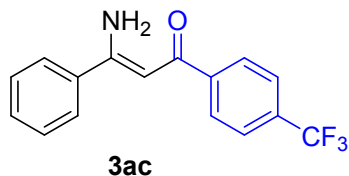

(Z)-3-amino-3-phenyl-1-(4-(trifluoromethyl)phenyl)prop-2-en-1-one (**3ac**)<sup>6</sup>, CAS Number: 1770769-96-4, white solid, mp 79-81 °C, 40.2 mg, 69% yield. <sup>1</sup>H NMR (600 MHz, CDCl<sub>3</sub>) δ 10.50 (s, 1H), 8.03 (d, *J* = 8.2 Hz, 2H), 7.69 (d, *J* = 8.3 Hz, 2H), 7.64 (dd, *J* = 5.3, 3.3 Hz, 2H), 7.54-7.48 (m, 3H), 6.12 (s, 1H), 5.61 (s, 1H). <sup>13</sup>C NMR (150 MHz, CDCl<sub>3</sub>) δ 188.48, 163.85, 143.39, 137.19, 131.04, 129.16, 127.51, 126.35, 125.33 (q, *J* = 4.5 Hz), 91.80. <sup>19</sup>F NMR (565 MHz, CDCl<sub>3</sub>) δ -62.75. HRMS (ESI) *m/z* calcd. for C<sub>16</sub>H<sub>12</sub>F<sub>3</sub>NNaO [M+Na]<sup>+</sup> : 314.0769, found : 314.0772.

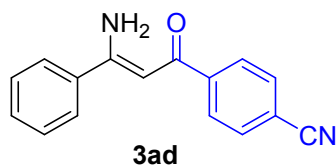

(Z)-4-(3-amino-3-phenylacryloyl)benzonitrile (**3ad**), white solid, mp 85-87 °C, 32.2 mg, 65% yield. <sup>1</sup>H NMR (600 MHz, CDCl<sub>3</sub>) δ 10.53 (s, 1H), 8.00 (d, *J* = 8.3 Hz, 2H), 7.71 (d, *J* = 8.3 Hz, 2H), 7.63 (d, *J* = 7.2 Hz, 2H), 7.53 (t, *J* = 7.3 Hz, 1H), 7.49 (t, *J* = 7.4 Hz, 2H), 6.09 (s, 1H), 5.75 (s, 1H). <sup>13</sup>C NMR (150 MHz, CDCl<sub>3</sub>) δ 187.6, 164.3, 144.0, 136.9, 132.2, 131.2, 129.2, 127.7, 126.4, 118.6, 114.2, 91.7. HRMS (ESI) *m/z* calcd. for C<sub>16</sub>H<sub>12</sub>N<sub>2</sub>NaO [M+Na]<sup>+</sup> : 271.0847, found: 271.0849.

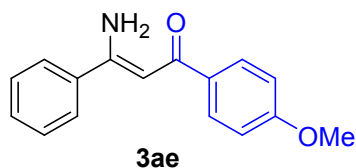

(Z)-3-amino-1-(4-methoxyphenyl)-3-phenylprop-2-en-1-one (**3ae**)<sup>3</sup>, CAS Number: 183271-59-2, yellow oil, 35.9 mg, 71% yield. <sup>1</sup>H NMR (600 MHz, CDCl<sub>3</sub>) δ 10.37 (s, 1H), 7.98-7.96 (m, 2H), 7.66 (dd, *J* = 7.9, 1.4 Hz, 2H), 7.52-7.48 (m, 3H), 6.96 (dd, *J* = 6.7, 4.9 Hz, 2H), 6.14 (s, 1H), 5.37 (s, 1H), 3.88 (s, 3H). <sup>13</sup>C NMR (150 MHz,

CDCl<sub>3</sub>)  $\delta$  189.2, 162.3, 162.1, 137.9, 133.0, 130.6, 129.2, 129.0, 126.3, 113.5, 91.6, 55.4. HRMS (ESI)  $m/z$  calcd. for C<sub>16</sub>H<sub>15</sub>NNaO<sub>2</sub> [M+Na]<sup>+</sup> : 276.0995, found: 276.0999.

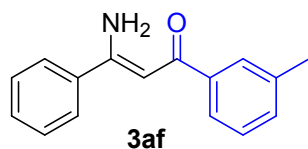

(Z)-3-amino-3-phenyl-1-(m-tolyl)prop-2-en-1-one (**3af**)<sup>4</sup>, CAS Number: 2087908-85-6, yellow oil, 38.9 mg, 82% yield. <sup>1</sup>H NMR (600 MHz, CDCl<sub>3</sub>)  $\delta$  10.42 (s, 1H), 7.77 (s, 1H), 7.74 (d,  $J$  = 7.6 Hz, 1H), 7.66-7.63 (m, 2H), 7.52-7.46 (m, 3H), 7.33 (dd,  $J$  = 9.3, 5.7 Hz, 1H), 7.29 (d,  $J$  = 7.5 Hz, 1H), 6.14 (s, 1H), 5.50 (s, 1H), 2.42 (s, 3H). <sup>13</sup>C NMR (150 MHz, CDCl<sub>3</sub>)  $\delta$  190.4, 162.8, 140.4, 138.0, 137.7, 131.8, 130.7, 129.0, 128.2, 127.9, 126.4, 124.4, 92.0, 21.5. HRMS (ESI)  $m/z$  calcd. for C<sub>16</sub>H<sub>15</sub>NNaO [M+Na]<sup>+</sup> : 260.1046; found : 260.1052.

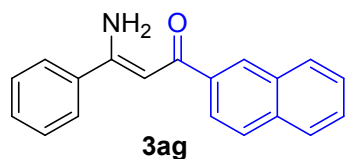

(Z)-3-amino-1-(naphthalen-2-yl)-3-phenylprop-2-en-1-one (**3ag**)<sup>3</sup>, CAS Number: 1887029-62-0, white solid, mp 87-89 °C, 45.4 mg, 83% yield. <sup>1</sup>H NMR (600 MHz, CDCl<sub>3</sub>)  $\delta$  10.50 (s, 1H), 8.46 (s, 1H), 8.07 (dd,  $J$  = 8.5, 1.6 Hz, 1H), 7.96 (d,  $J$  = 7.8 Hz, 1H), 7.90 (d,  $J$  = 8.6 Hz, 1H), 7.87 (d,  $J$  = 7.8 Hz, 1H), 7.69-7.68 (m, 2H), 7.56-7.48 (m, 5H), 6.31 (s, 1H), 5.53 (s, 1H). <sup>13</sup>C NMR (150 MHz, CDCl<sub>3</sub>)  $\delta$  190.0, 163.0, 137.7, 134.8, 132.9, 130.8, 129.3, 129.1, 128.0, 127.7, 127.7, 127.3, 126.4, 126.3, 124.2, 92.2. HRMS(ESI)  $m/z$  calcd. for C<sub>19</sub>H<sub>15</sub>NNaO [M+Na]<sup>+</sup> : 296.1046, found : 296.1048.

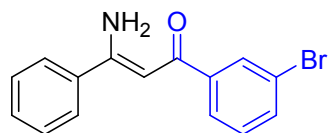

**3ah**

(*Z*)-3-amino-1-(3-bromophenyl)-3-phenylprop-2-en-1-one (**3ah**), white solid, mp 65-67 °C, 46.4 mg, 77% yield. <sup>1</sup>H NMR (600 MHz, CDCl<sub>3</sub>) δ 10.43 (s, 1H), 8.06 (t, *J* = 1.7 Hz, 1H), 7.85 (d, *J* = 7.8 Hz, 1H), 7.62 (dd, *J* = 5.2, 3.3 Hz, 2H), 7.59-7.57 (m, 1H), 7.52-7.50 (m, 1H), 7.48-7.46 (m, 2H), 7.30 (t, *J* = 7.8 Hz, 1H), 6.06 (s, 1H), 5.65 (s, 1H). <sup>13</sup>C NMR (150 MHz, CDCl<sub>3</sub>) δ 188.2, 163.6, 142.3, 137.2, 133.8, 130.9, 130.4, 129.9, 129.1, 126.4, 125.8, 122.6, 91.5. HRMS (ESI) *m/z* calcd. for C<sub>15</sub>H<sub>12</sub>BrNNaO [M+Na]<sup>+</sup> : 323.9994, found : 323.9998.

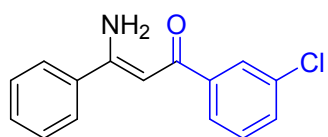

**3ai**

(*Z*)-3-amino-1-(3-chlorophenyl)-3-phenylprop-2-en-1-one (**3ai**), white solid, mp 59-61 °C, 39.1 mg, 76% yield. <sup>1</sup>H NMR (600 MHz, CDCl<sub>3</sub>) δ 10.43 (s, 1H), 7.91 (t, *J* = 1.7 Hz, 1H), 7.81 (d, *J* = 7.7 Hz, 1H), 7.63-7.62 (m, 2H), 7.52-7.46 (m, 3H), 7.44-7.42 (m, 1H), 7.36 (t, *J* = 7.8 Hz, 1H), 6.07 (s, 1H), 5.63 (s, 1H). <sup>13</sup>C NMR (150 MHz, CDCl<sub>3</sub>) δ 188.3, 163.6, 142.1, 137.3, 134.5, 130.9, 130.9, 129.6, 129.1, 127.4, 126.4, 125.3, 91.6. HRMS (ESI) *m/z* calcd. for C<sub>15</sub>H<sub>12</sub>ClNNaO [M+Na]<sup>+</sup> : 280.0500, found : 280.0501

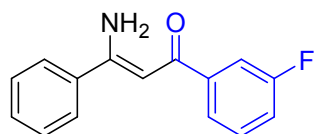

**3aj**

(*Z*)-3-amino-1-(3-fluorophenyl)-3-phenylprop-2-en-1-one (**3aj**), yellow oil, 33.7 mg, 70% yield. <sup>1</sup>H NMR (600 MHz, CDCl<sub>3</sub>) δ 10.43 (s, 1H), 7.71 (d, *J* = 7.7 Hz, 1H), 7.63 (dd, *J* = 9.7, 2.7 Hz, 3H), 7.52-7.46 (m, 3H), 7.39 (td, *J* = 8.0, 5.7 Hz, 1H), 7.16 (ddd, *J* = 10.3, 8.0, 2.3 Hz, 1H), 6.09 (s, 1H), 5.60 (s, 1H). <sup>13</sup>C NMR (150 MHz, CDCl<sub>3</sub>)

$\delta$  188.40 (d,  $J = 1.5$  Hz), 163.52, 162.89 (d,  $J = 244.5$  Hz), 142.67 (d,  $J = 6.0$  Hz), 137.31, 130.91, 129.81 (d,  $J = 7.5$  Hz), 129.11, 126.36, 122.82 (d,  $J = 3.0$  Hz, 1), 117.85 (d,  $J = 22.5$  Hz), 114.15 (d,  $J = 22.5$  Hz), 91.63.  $^{19}\text{F}$  NMR (565 MHz,  $\text{CDCl}_3$ )  $\delta$  -112.89 - -112.94. HRMS (ESI)  $m/z$  calcd. for  $\text{C}_{15}\text{H}_{12}\text{FNNaO}$   $[\text{M}+\text{Na}]^+$  : 264.0795, found: 264.0794.

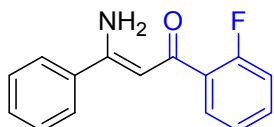

**3ak**

(*Z*)-3-amino-1-(2-fluorophenyl)-3-phenylprop-2-en-1-one (**3ak**), white solid, mp 68-70 °C, 31.3 mg, 65% yield.  $^1\text{H}$  NMR (600 MHz,  $\text{CDCl}_3$ )  $\delta$  10.39 (s, 1H), 7.85 (td,  $J = 7.6, 1.8$  Hz, 1H), 7.64-7.62 (m, 2H), 7.51-7.46 (m, 3H), 7.42-7.38 (m, 1H), 7.21 (td,  $J = 7.7, 0.9$  Hz, 1H), 7.11-7.08 (m, 1H), 6.12 (s, 1H), 5.58 (s, 1H).  $^{13}\text{C}$  NMR (150 MHz,  $\text{CDCl}_3$ )  $\delta$  186.94 (d,  $J = 3.0$  Hz), 162.97, 160.46 (d,  $J = 250.5$  Hz), 137.19, 132.09 (d,  $J = 9.0$  Hz), 130.84, 130.44 (d,  $J = 1.5$  Hz), 129.05, 126.42, 124.18 (d,  $J = 3.0$  Hz), 116.33 (d,  $J = 24.0$  Hz), 96.12 (d,  $J = 9.0$  Hz).  $^{19}\text{F}$  NMR (565 MHz,  $\text{CDCl}_3$ )  $\delta$  -112.22 - -112.26. HRMS (ESI)  $m/z$  calcd. for  $\text{C}_{15}\text{H}_{12}\text{FNNaO}$   $[\text{M}+\text{Na}]^+$  : 264.0795, found : 264.0799.

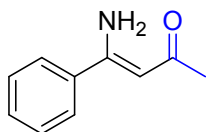

**3al**

(*Z*)-4-amino-4-phenylbut-3-en-2-one (**3al**)<sup>8</sup>, CAS Number: 14088-41-6, white solid, mp 142-144 °C, 13.8 mg, 43% yield.  $^1\text{H}$  NMR (600 MHz,  $\text{CDCl}_3$ )  $\delta$  10.22 (s, 1H), 7.89-7.87 (m, 2H), 7.45-7.39 (m, 3H), 5.74 (s, 1H), 5.17 (s, 1H), 2.06 (s, 3H).  $^{13}\text{C}$  NMR (150 MHz,  $\text{CDCl}_3$ )  $\delta$  189.5, 162.8, 140.2, 130.8, 128.2, 127.1, 92.3, 22.9. HRMS (ESI)  $m/z$  calcd. for  $\text{C}_{10}\text{H}_{11}\text{NNaO}$   $[\text{M}+\text{Na}]^+$  : 184.0738, found : 184.0745.

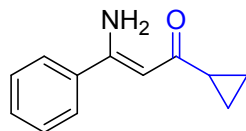

**3am**

(Z)-3-amino-1-cyclopropyl-3-phenylprop-2-en-1-one (**3am**), CAS Number: 1855911-48-6, oil, 13.4 mg, 32% yield.  $^1\text{H}$  NMR (600 MHz,  $\text{CDCl}_3$ )  $\delta$  9.88 (s, 1H), 7.62 – 7.56 (m, 2H), 7.52 – 7.42 (m, 3H), 5.61 (s, 1H), 5.24 (s, 1H), 1.84 (ddd,  $J = 7.9, 4.6, 3.3$  Hz, 1H), 1.08 – 1.03 (m, 2H), 0.82 (dq,  $J = 7.0, 3.6$  Hz, 2H).  $^{13}\text{C}$  NMR (150 MHz,  $\text{CDCl}_3$ )  $\delta$  199.3, 160.1, 137.5, 130.5, 128.9, 126.3, 95.0, 20.9, 9.5. HRMS (ESI)  $m/z$  calcd. for  $\text{C}_{12}\text{H}_{13}\text{NNaO}$   $[\text{M}+\text{Na}]^+$  : 210.0895, found : 210.0901.

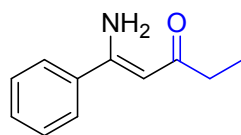

**3an**

(Z)-1-amino-1-phenylpent-1-en-3-one (**3an**), CAS Number: 123433-77-2, oil, 14 mg, 40% yield.  $^1\text{H}$  NMR (600 MHz,  $\text{CDCl}_3$ )  $\delta$  9.94 (s, 1H), 7.62 – 7.53 (m, 2H), 7.53 – 7.40 (m, 3H), 5.47 (d,  $J = 1.1$  Hz, 1H), 5.30 (s, 1H), 2.44 (q,  $J = 7.5$  Hz, 2H), 1.17 (t,  $J = 7.5$  Hz, 3H).  $^{13}\text{C}$  NMR (150 MHz,  $\text{CDCl}_3$ )  $\delta$  201.2, 160.9, 137.4, 130.5, 128.9, 126.3, 94.2, 35.7, 9.8. HRMS (ESI)  $m/z$  calcd. for  $\text{C}_{11}\text{H}_{13}\text{NNaO}$   $[\text{M}+\text{Na}]^+$  : 198.0895, found : 198.0899.

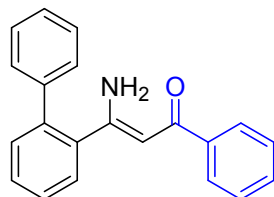

**3ao**

(Z)-3-([1,1'-biphenyl]-2-yl)-3-amino-1-phenylprop-2-en-1-one (**3ao**), yellow oil, 49.3 mg, 82% yield.  $^1\text{H}$  NMR (600 MHz,  $\text{CDCl}_3$ )  $\delta$  10.17 (s, 1H), 7.77-7.75 (m, 2H), 7.58 (td,  $J = 7.5, 1.4$  Hz, 1H), 7.51 (tt,  $J = 3.8, 1.9$  Hz, 1H), 7.48-7.46 (m, 2H), 7.45-7.42 (m, 2H), 7.41-7.37 (m, 4H), 7.36-7.33 (m, 1H), 5.88 (s, 1H), 5.17 (s, 1H).  $^{13}\text{C}$  NMR

(150 MHz, CDCl<sub>3</sub>)  $\delta$  189.6, 163.7, 140.2, 140.1, 140.1, 136.5, 131.0, 130.9, 130.0, 129.0, 128.7, 128.6, 128.2, 127.7, 127.6, 127.2, 94.9. HRMS (ESI)  $m/z$  calcd. for C<sub>21</sub>H<sub>18</sub>NO [M+H]<sup>+</sup> : 300.1388, found : 300.1403.

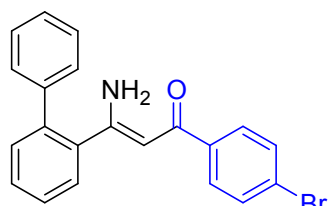

**3ap**

(Z)-3-([1,1'-biphenyl]-2-yl)-3-amino-1-(4-bromophenyl)prop-2-en-1-one (**3ap**), white solid, mp 165-166 °C, 59.6 mg, 719% yield. <sup>1</sup>H NMR (600 MHz, CDCl<sub>3</sub>)  $\delta$  10.16 (s, 1H), 7.57 (ddd,  $J$  = 6.3, 4.2, 1.5 Hz, 3H), 7.53-7.48 (m, 3H), 7.46-7.41 (m, 4H), 7.39 (dd,  $J$  = 10.2, 4.8 Hz, 2H), 7.35-7.32 (m, 1H), 5.77 (s, 1H), 5.29 (s, 1H). <sup>13</sup>C NMR (150 MHz, CDCl<sub>3</sub>)  $\delta$  188.2, 164.1, 140.2, 140.0, 139.0, 136.3, 131.4, 131.0, 130.1, 128.9, 128.8, 128.7, 128.6, 127.7, 127.7, 125.6, 94.7. HRMS (ESI)  $m/z$  calcd. for C<sub>21</sub>H<sub>17</sub>BrNO [M+H]<sup>+</sup> : 378.0494, found: 378.0508.

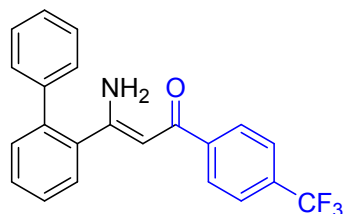

**3aq**

(Z)-3-([1,1'-biphenyl]-2-yl)-3-amino-1-(4-(trifluoromethyl)phenyl)prop-2-en-1-one (**3aq**)<sup>6</sup>, white solid, mp 110-112 °C, 52.1 mg, 76% yield. <sup>1</sup>H NMR (600 MHz, CDCl<sub>3</sub>)  $\delta$  10.25 (s, 1H), 7.79 (d,  $J$  = 8.1 Hz, 2H), 7.62 (d,  $J$  = 8.2 Hz, 2H), 7.58 (d,  $J$  = 7.6 Hz, 1H), 7.53 (td,  $J$  = 7.6, 1.0 Hz, 1H), 7.47-7.44 (m, 4H), 7.40 (t,  $J$  = 7.4 Hz, 2H), 7.35 (t,  $J$  = 7.2 Hz, 1H), 5.80 (s, 1H), 5.31 (s, 1H). <sup>13</sup>C NMR (150 MHz, CDCl<sub>3</sub>)  $\delta$  187.95, 164.54, 143.28, 140.26, 136.08, 132.31 (q,  $J$  = 31.5 Hz), 131.07, 130.21, 128.73, 127.72 (q,  $J$  = 7.5 Hz), 127.46, 125.19 (q,  $J$  = 3.0 Hz), 123.99 (q,  $J$  = 271.5.0 Hz), 95.01. <sup>19</sup>F NMR (565 MHz, CDCl<sub>3</sub>)  $\delta$  -62.72. HRMS (ESI)  $m/z$  calcd. for C<sub>22</sub>H<sub>17</sub>F<sub>3</sub>NO [M+H]<sup>+</sup> : 368.1262, found: 368.1288.

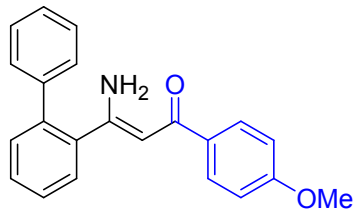

**3ar**

(*Z*)-3-([1,1'-biphenyl]-2-yl)-3-amino-1-(4-methoxyphenyl)prop-2-en-1-one (**3ar**), white solid, mp 132-134 °C, 50.0 mg, 76% yield. <sup>1</sup>H NMR (600 MHz, CDCl<sub>3</sub>) δ 10.07 (s, 1H), 7.76-7.73 (m, 2H), 7.58 (dd, *J* = 7.6, 1.1 Hz, 1H), 7.52-7.49 (m, 1H), 7.47-7.41 (m, 3H), 7.42 (dd, *J* = 7.5, 1.3 Hz, 1H), 7.39-7.37 (m, 2H), 7.34-7.31 (m, 1H), 6.89-6.86 (m, 2H), 5.83 (s, 1H), 5.02 (s, 1H), 3.83 (s, 3H). <sup>13</sup>C NMR (150 MHz, CDCl<sub>3</sub>) δ 188.7, 163.0, 162.0, 140.1, 140.1, 136.7, 133.0, 130.9, 129.8, 129.1, 129.0, 128.7, 128.5, 127.6, 127.6, 113.4, 94.6, 55.3. HRMS (ESI) *m/z* calcd. for C<sub>22</sub>H<sub>20</sub>NO<sub>2</sub> [M+H]<sup>+</sup>: 330.1494, found : 330.1404.

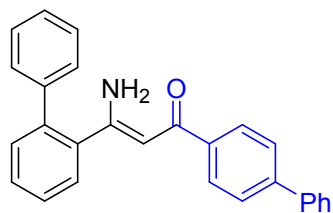

**3as**

(*Z*)-3-([1,1'-biphenyl]-2-yl)-1-([1,1'-biphenyl]-4-yl)-3-aminoprop-2-en-1-one (**3as**), yellow oil, 65.3 mg, 87% yield. <sup>1</sup>H NMR (600 MHz, CDCl<sub>3</sub>) δ 10.25 (s, 1H), 8.18 (s, 1H), 7.91-7.89 (m, 2H), 7.86-7.84 (m, 2H), 7.64 (dd, *J* = 7.6, 1.1 Hz, 1H), 7.55-7.50 (m, 6H), 7.49 - 7.47 (m, 2H), 7.45-7.42 (m, 3H), 7.38-7.35 (m, 1H), 6.01 (s, 1H), 5.20 (s, 1H). <sup>13</sup>C NMR (150 MHz, CDCl<sub>3</sub>) δ 189.6, 163.5, 140.3, 140.2, 137.6, 136.5, 134.7, 132.8, 131.0, 130.03, 129.3, 129.0, 128.8, 128.6, 127.9, 127.7, 127.7, 127.7, 127.3, 126.3, 124.2, 95.4. HRMS (ESI) *m/z* calcd. for C<sub>27</sub>H<sub>22</sub>NO [M+H]<sup>+</sup>: 376.1701, found : 376.1713.

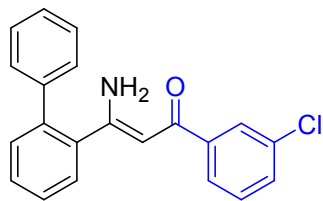

**3at**

(*Z*)-3-([1,1'-biphenyl]-2-yl)-3-amino-1-(3-chlorophenyl)prop-2-en-1-one (**3at**), yellow oil, 48.6 mg, 73% yield.  $^1\text{H}$  NMR (600 MHz,  $\text{CDCl}_3$ )  $\delta$  10.17 (s, 1H), 7.66 (t,  $J = 1.8$  Hz, 1H), 7.60-7.56 (m, 2H), 7.54-7.51 (m, 1H), 7.46-7.42 (m, 4H), 7.39- (m, 3H), 7.36-7.34 (m, 1H), 7.29 (dd,  $J = 10.0, 5.7$  Hz, 1H), 5.77 (s, 1H), 5.27 (s, 1H).  $^{13}\text{C}$  NMR (150 MHz,  $\text{CDCl}_3$ )  $\delta$  187.9, 164.2, 142.0, 140.2, 140.0, 136.2, 134.3, 131.0, 130.8, 130.1, 129.5, 128.9, 128.7, 128.6, 127.7, 127.4, 125.3, 94.8. HRMS (ESI)  $m/z$  calcd. for  $\text{C}_{21}\text{H}_{17}\text{ClNO}$   $[\text{M}+\text{H}]^+$ : 334.0999, found : 334.1012.

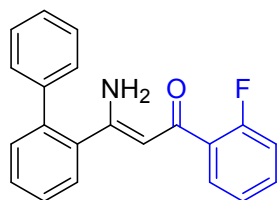

**3au**

(*Z*)-3-([1,1'-biphenyl]-2-yl)-3-amino-1-(2-fluorophenyl)prop-2-en-1-one (**3au**), white solid, mp 147-149  $^\circ\text{C}$ , 43.7 mg, 69% yield.  $^1\text{H}$  NMR (600 MHz,  $\text{CDCl}_3$ )  $\delta$  7.70 (td,  $J = 7.7, 1.8$  Hz, 1H), 7.57 (dd,  $J = 7.6, 1.1$  Hz, 1H), 7.50 (td,  $J = 7.6, 1.3$  Hz, 1H), 7.47-7.45 (m, 2H), 7.44-7.42 (m, 1H), 7.41-7.39 (m, 2H), 7.38-7.34 (m, 3H), 7.16 (td,  $J = 7.6, 1.0$  Hz, 1H), 7.05 (ddd,  $J = 11.0, 8.3, 0.8$  Hz, 1H), 5.89 (s, 1H), 5.21 (s, 1H).  $^{13}\text{C}$  NMR (150 MHz,  $\text{CDCl}_3$ )  $\delta$  186.46 (d,  $J = 3.0$  Hz), 160.47 (d,  $J = 250.6$  Hz), 161.30, 159.63, 140.00 (d,  $J = 22.5$  Hz), 136.23, 132.00 (d,  $J = 9.0$  Hz), 130.94, 130.41 (d,  $J = 3.0$  Hz), 130.00, 129.13, 128.88 (d,  $J = 12.0$  Hz), 128.67 (d,  $J = 19.5$  Hz), 127.64 (d,  $J = 1.5$  Hz), 124.04 (d,  $J = 3.0$  Hz), 116.23 (d,  $J = 2.4$  Hz), 98.81 (d,  $J = 9.0$  Hz).  $^{19}\text{F}$  NMR (565 MHz,  $\text{CDCl}_3$ )  $\delta$  -112.20 - -112.24. HRMS (ESI)  $m/z$  calcd. for  $\text{C}_{21}\text{H}_{17}\text{FNO}$   $[\text{M}+\text{H}]^+$ : 318.1294, found : 318.1308.

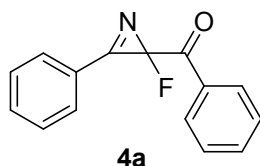

**4a**

(2-fluoro-3-phenyl-2H-azirin-2-yl)(phenyl)methanone (**4a**)<sup>9</sup>, CAS Number: 2222482-03-1, 43.7 mg, 67% yield.  $^1\text{H}$  NMR (600 MHz,  $\text{CDCl}_3$ )  $\delta$  8.21 (dt,  $J = 8.5, 1.6$  Hz, 2H), 8.07 – 7.96 (m, 2H), 7.78 – 7.73 (m, 1H), 7.67 (dt,  $J = 15.7, 7.6$  Hz, 3H), 7.57 (t,  $J = 7.8$  Hz, 2H).  $^{13}\text{C}$  NMR (150 MHz,  $\text{CDCl}_3$ )  $\delta$  192.9 (d,  $J = 38.3$  Hz), 167.2 (d,  $J =$



12.0 Hz), 135.0, 134.0, 130.8, 129.8, 129.8, 129.6, 128.7, 120.8, 85.0 (d,  $J = 273.5$  Hz).  $^{19}\text{F}$  NMR (565 MHz,  $\text{CDCl}_3$ )  $\delta$  -144.60.

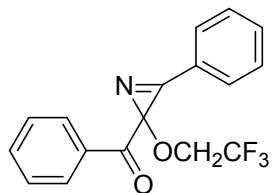

**4b**

phenyl(3-phenyl-2-(2,2,2-trifluoroethoxy)-2H-azirin-2-yl)methanone (**4b**)<sup>10</sup>, CAS Number: 1488363-00-3, white solid, mp 85-87 °C, 43.7 mg, 77% yield.  $^1\text{H}$  NMR (600 MHz,  $\text{CDCl}_3$ )  $\delta$  8.11 (d,  $J = 7.0$  Hz, 2H), 7.96 (d,  $J = 8.0$  Hz, 2H), 7.67 (t,  $J = 7.0$  Hz, 1H), 7.60 (t,  $J = 8.0$  Hz, 3H), 7.48 (t,  $J = 8.0$  Hz, 2H), 3.99-3.97 (m, 2H).  $^{13}\text{C}$  NMR (150 MHz,  $\text{CDCl}_3$ )  $\delta$  194.7, 165.3, 135.4, 134.6, 133.5, 130.5, 129.6, 129.5, 128.6, 123.1 ( $J_{\text{F-C}} = 276$  Hz), 121.6, 73.9, 63.9 ( $J_{\text{F-C}} = 36$  Hz).  $^{19}\text{F}$  NMR (566 MHz,  $\text{CDCl}_3$ )  $\delta$  -74.1 (s, 3F).

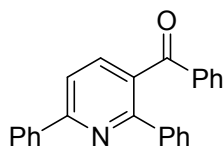

**4c**

(2,6-diphenylpyridin-3-yl)(phenyl)methanone (**4c**)<sup>11</sup>, CAS Number: 1415664-29-7, 51.6 mg, 77% yield.  $^1\text{H}$  NMR (600 MHz,  $\text{CDCl}_3$ )  $\delta$  8.27 – 8.19 (m, 2H), 7.98 (d,  $J = 8.0$  Hz, 1H), 7.88 (d,  $J = 8.0$  Hz, 1H), 7.78 – 7.71 (m, 2H), 7.69 – 7.63 (m, 2H), 7.56 (t,  $J = 7.4$  Hz, 2H), 7.54 – 7.50 (m, 1H), 7.49 – 7.46 (m, 1H), 7.34 (t,  $J = 7.7$  Hz, 2H), 7.32 – 7.24 (m, 3H).  $^{13}\text{C}$  NMR (150 MHz,  $\text{CDCl}_3$ )  $\delta$  197.6, 158.1, 157.3, 139.5, 138.5, 138.3, 136.9, 133.3, 132.6, 129.9, 129.7, 129.5, 128.9, 128.9, 128.4, 128.3, 127.3, 117.9.

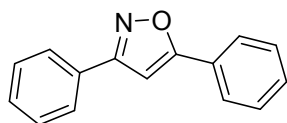

**4d**

3,5-diphenylisoxazole (**4d**)<sup>5</sup>, CAS Number: 2039-49-8, 43.7 mg, 89% yield. <sup>1</sup>H NMR (600 MHz, CDCl<sub>3</sub>) δ 7.93 – 7.89 (m, 2H), 7.89 – 7.84 (m, 2H), 7.51 (tdt, *J* = 10.9, 7.1, 3.7 Hz, 6H), 6.86 (s, 1H). <sup>13</sup>C NMR (150 MHz, CDCl<sub>3</sub>) δ 170.4, 163.0, 130.3, 130.1, 129.1, 129.0, 129.0, 127.5, 126.8, 125.9, 97.5.

## 5. References

- [1] W. Kuldeep, C. Yang, P. R. West, K. C. Deming, C. S. R., R. R. E., *Synth Commun.*, **2008**, 38, 4434.
- [2] A. Hassner; L. Levy, *J. Am. Chem. Soc.* **1965**, 87, 4203-4204.
- [3] Z. Zhu, X. Tang, J. Li, X. Li, W. Wu, G. Deng and H. Jiang, *Chem. Commun.*, **2017**, 53, 3228-3231.
- [4] X. Zeng, C. Liu, W. Yang, Y. Weng, X. Wang, and Y. Hu, *J. Org. Chem.*, **2019**, 84, 3656–3661
- [5] Y. Ning, X. Zhao, Y. Wu, and X. Bi, *Org. Lett.*, **2017**, 19, 6240–6243
- [6] H. S. P. Rao and N. Muthanna, *Eur. J. Org. Chem.*, **2015**, 1525
- [7] Cosford, Nicholas David Peter., *PCT Int. Appl.*, 2015191630, 17 Dec 2015.
- [8] S. Petr, B. Valerio, V. P. Marketa, M. Vladimir and L. Antonin, *Org. Biomol. Chem.*, **2005**, 3, 1217
- [9] Y. Zhang, X. Zhao, C. Zhuang, S. Wang, D. Zhang-Negrerie and Y. Du, *Adv. Synth. Catal.*, **2018**, 360, 2107
- [10] X. Sun, Y. Lyu, D. Zhang-Negrerie, Y. Du and K. Zhao, *Org. Lett.*, **2013**, 15, 6222.
- [11] G. Chen, Z. Wang, X. Zhang and X. Fan, *J. Org. Chem.*, **2017**, 82, 11230.

## 6. Copies of NMR spectra

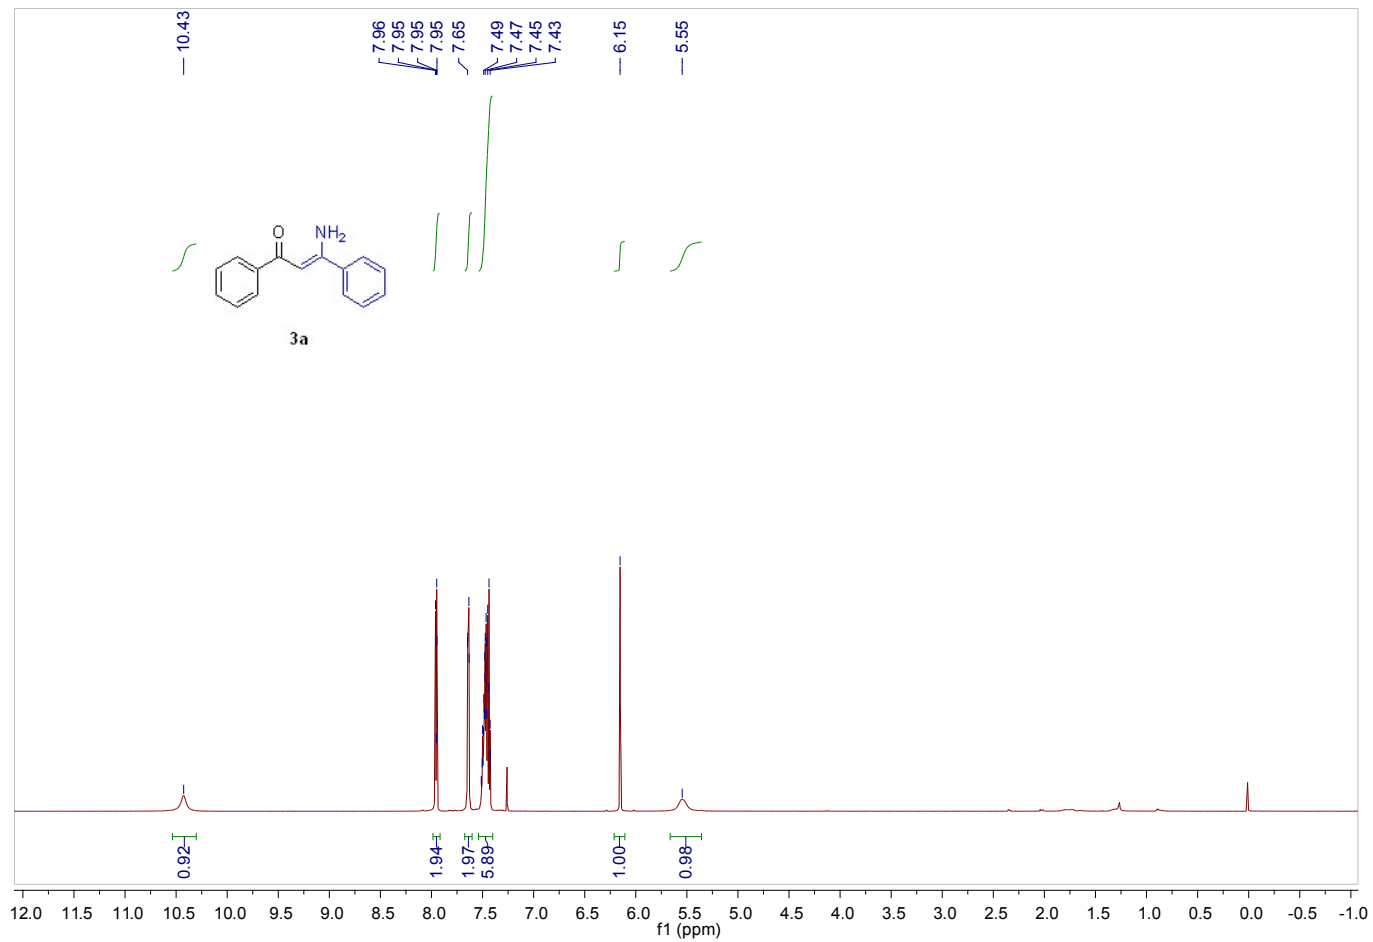

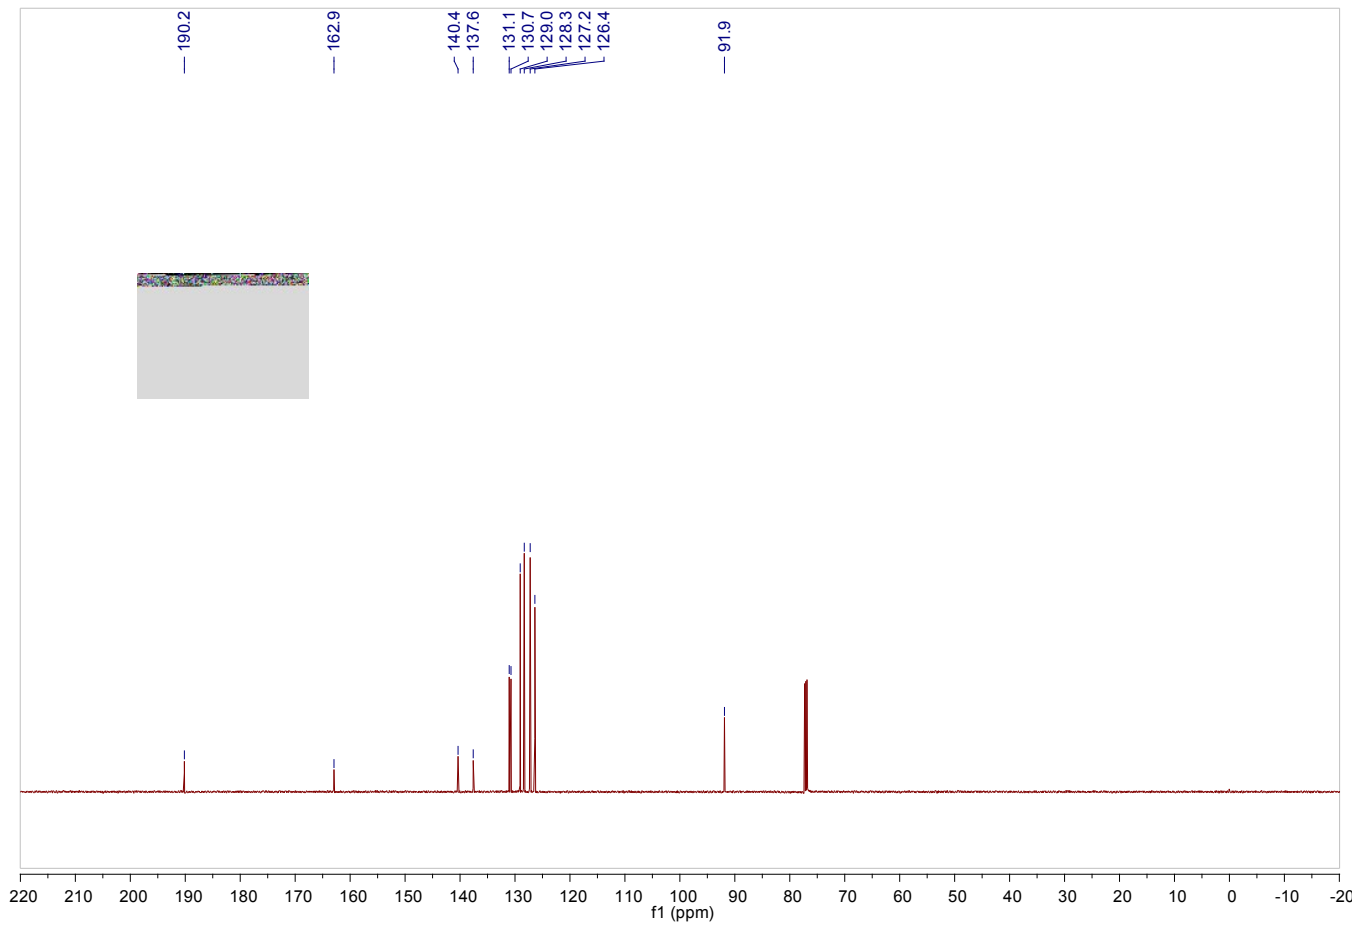

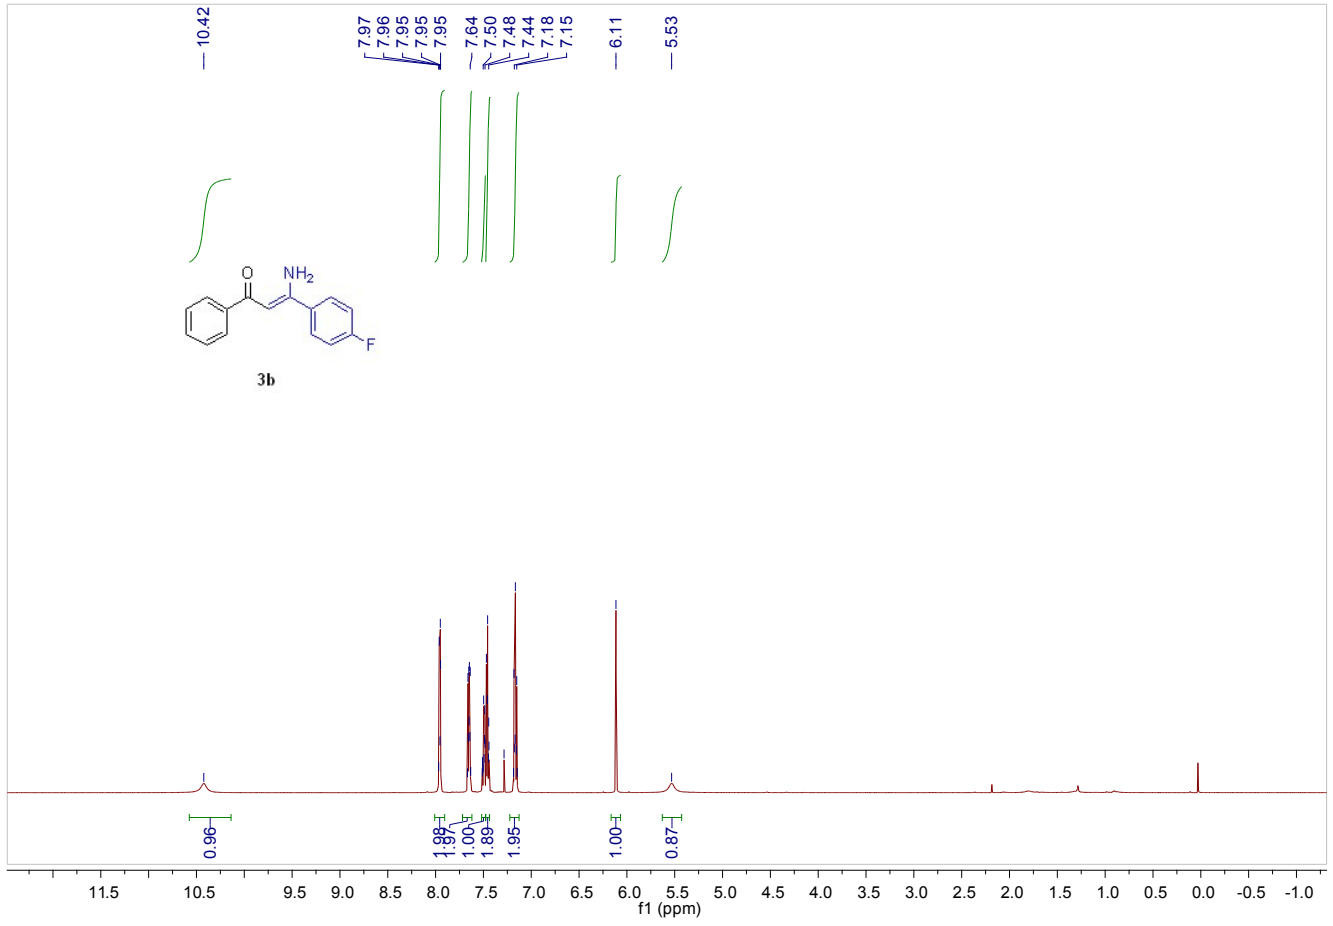

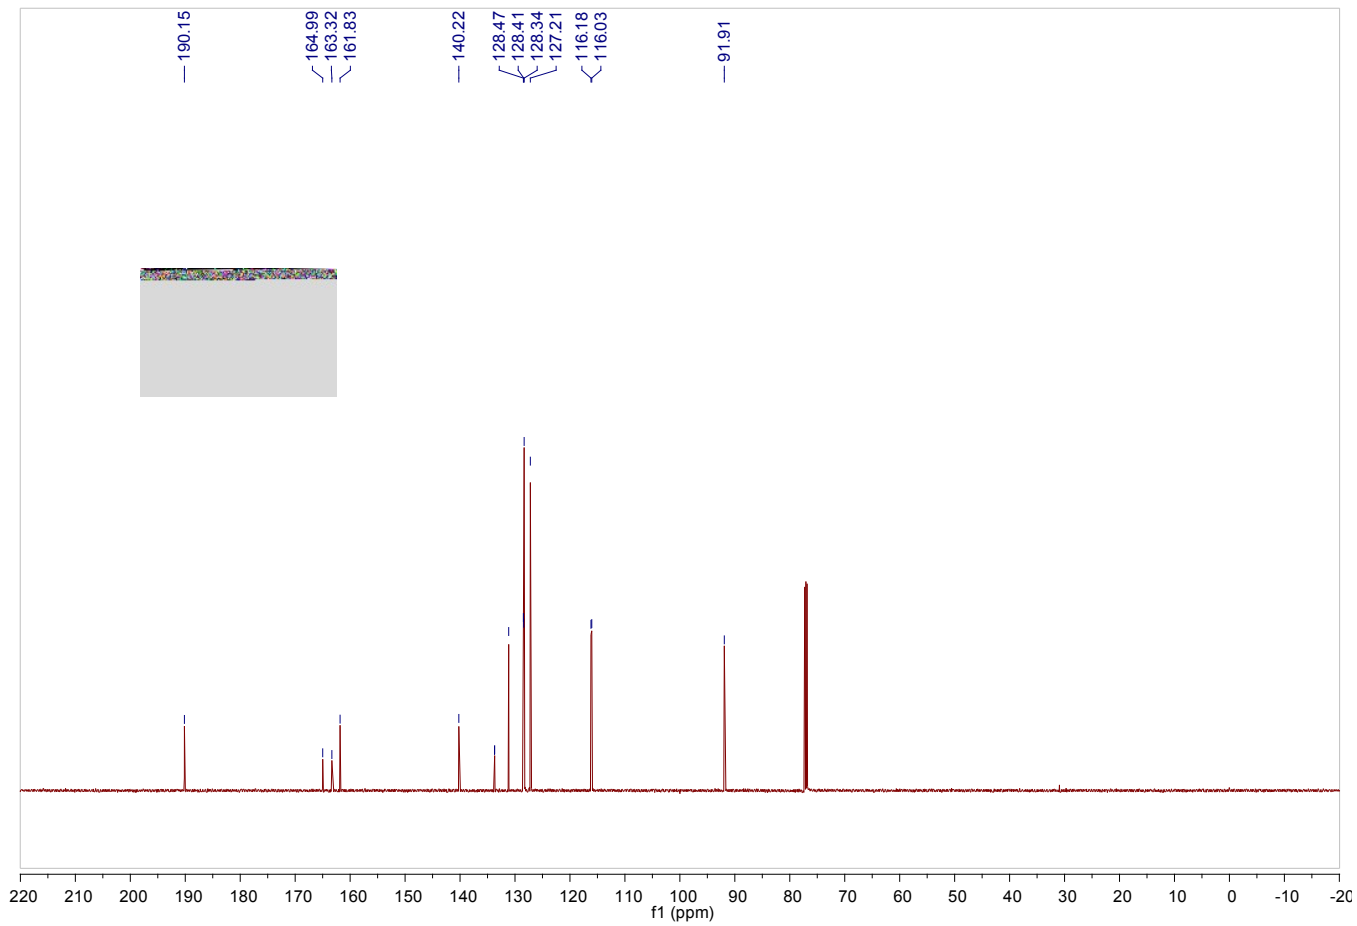

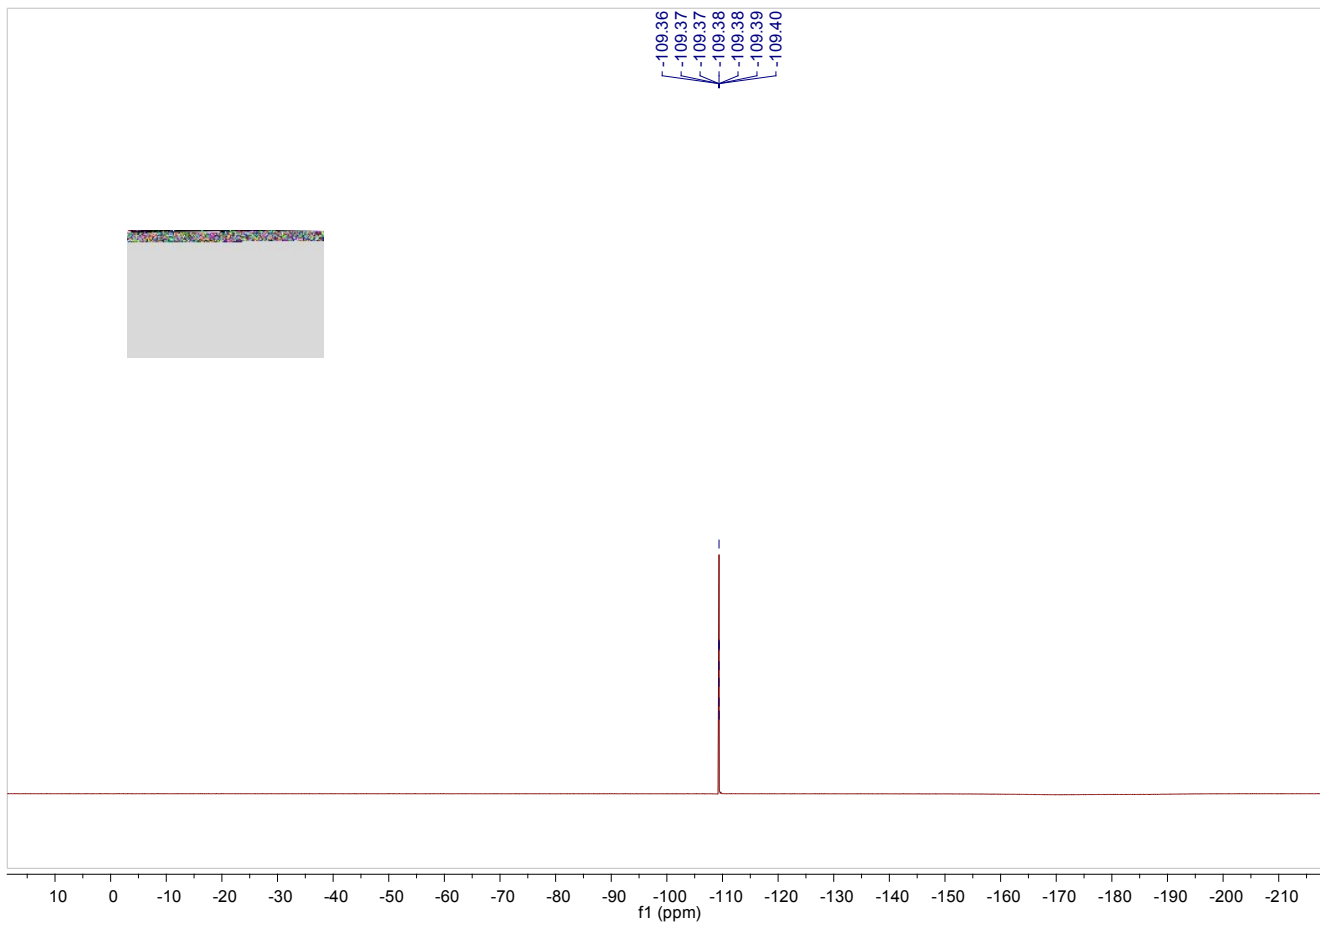

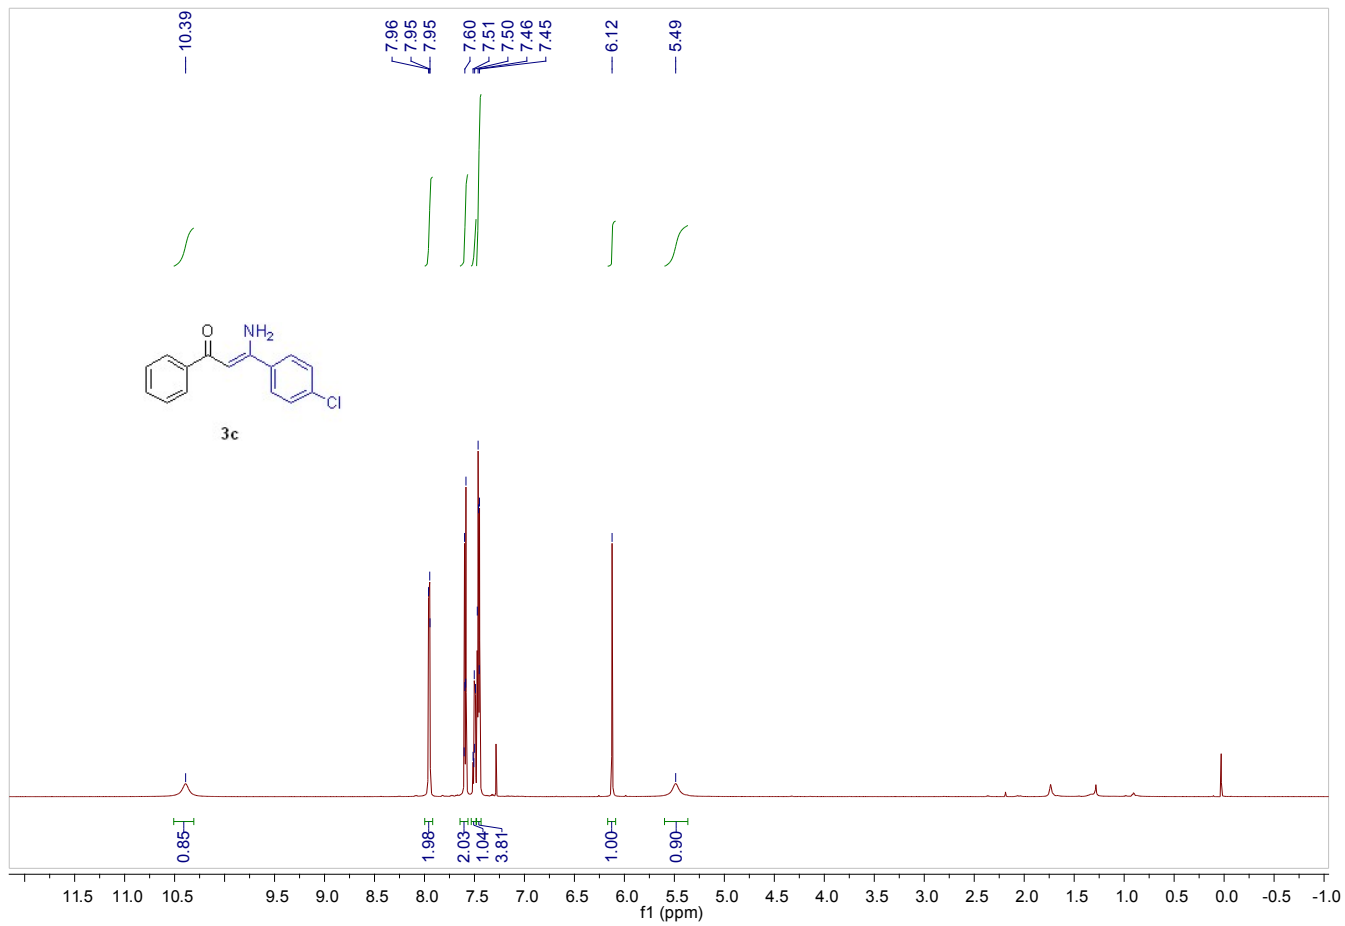



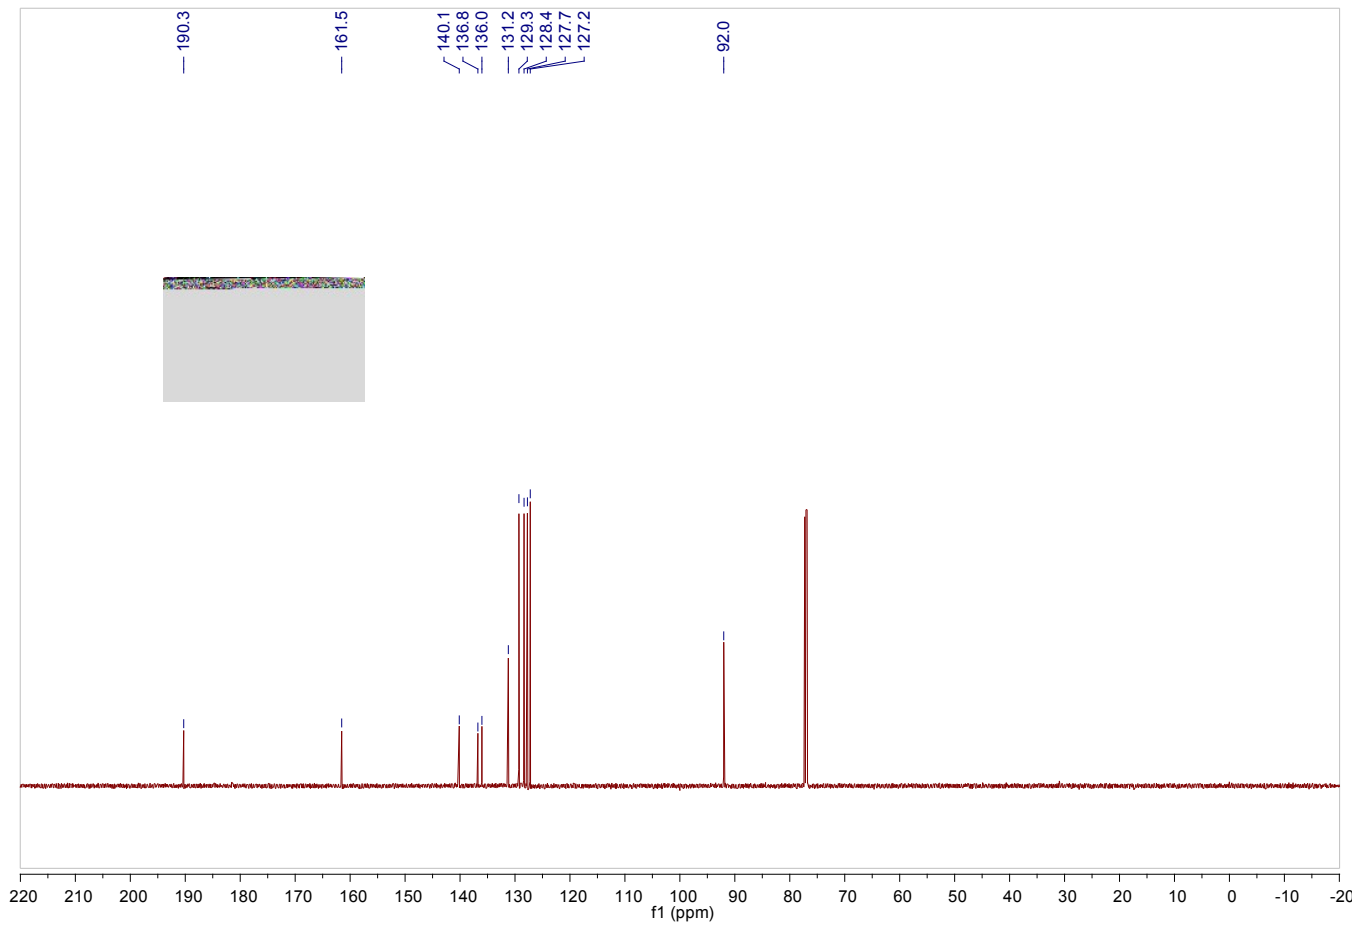

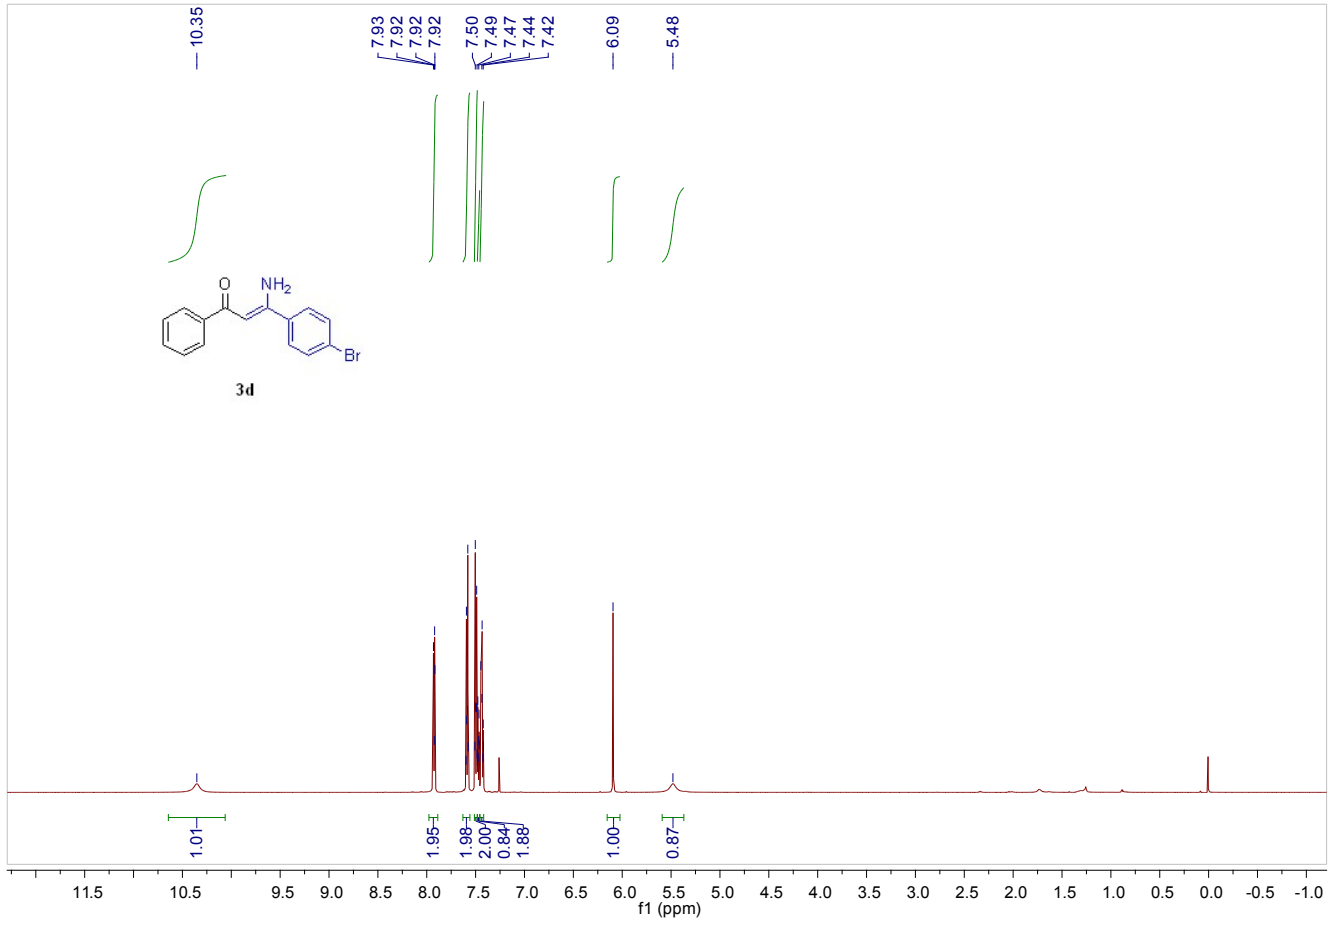

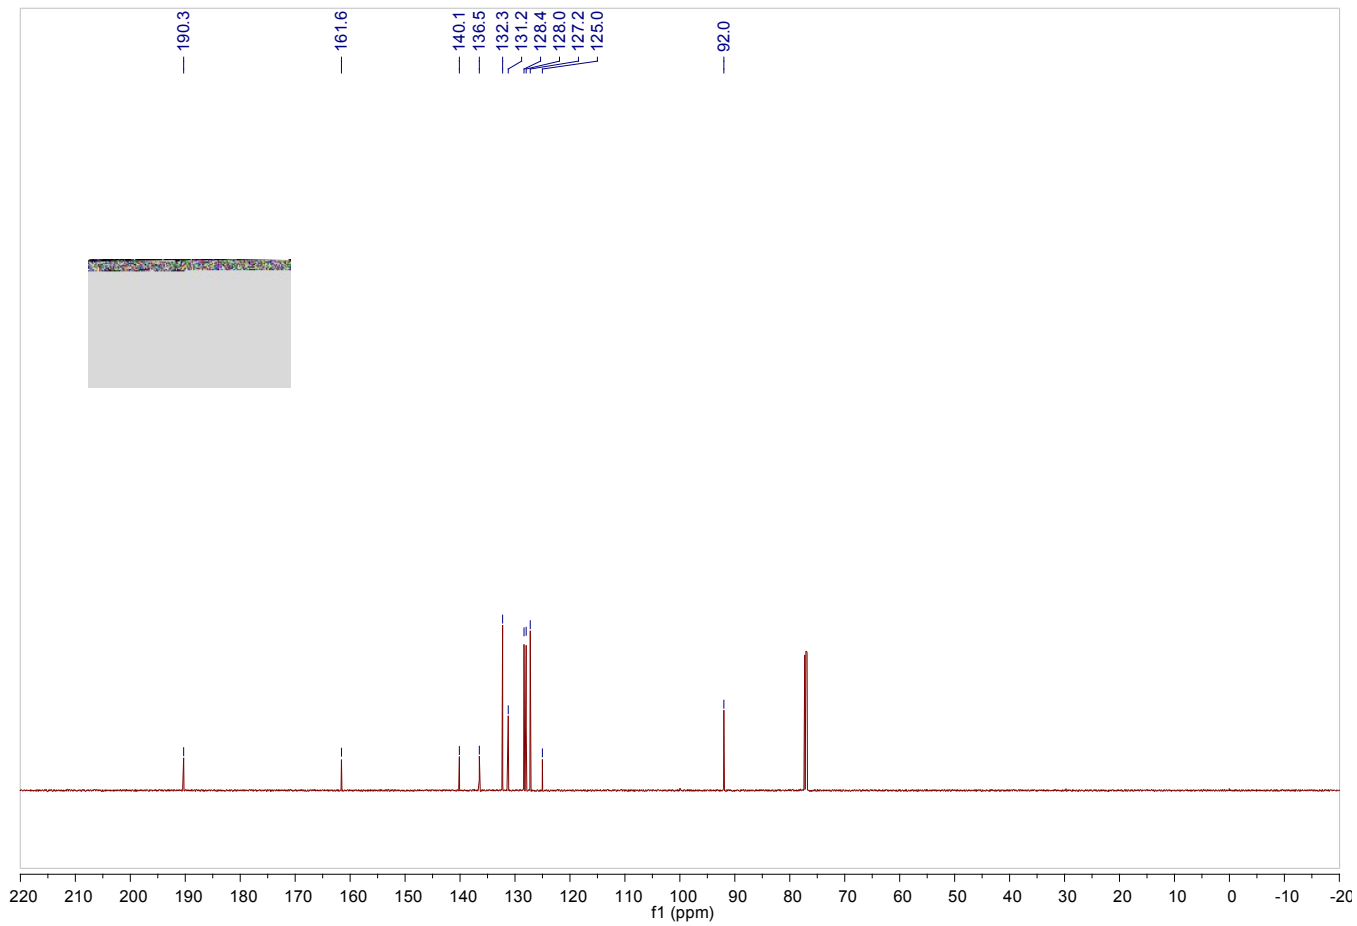



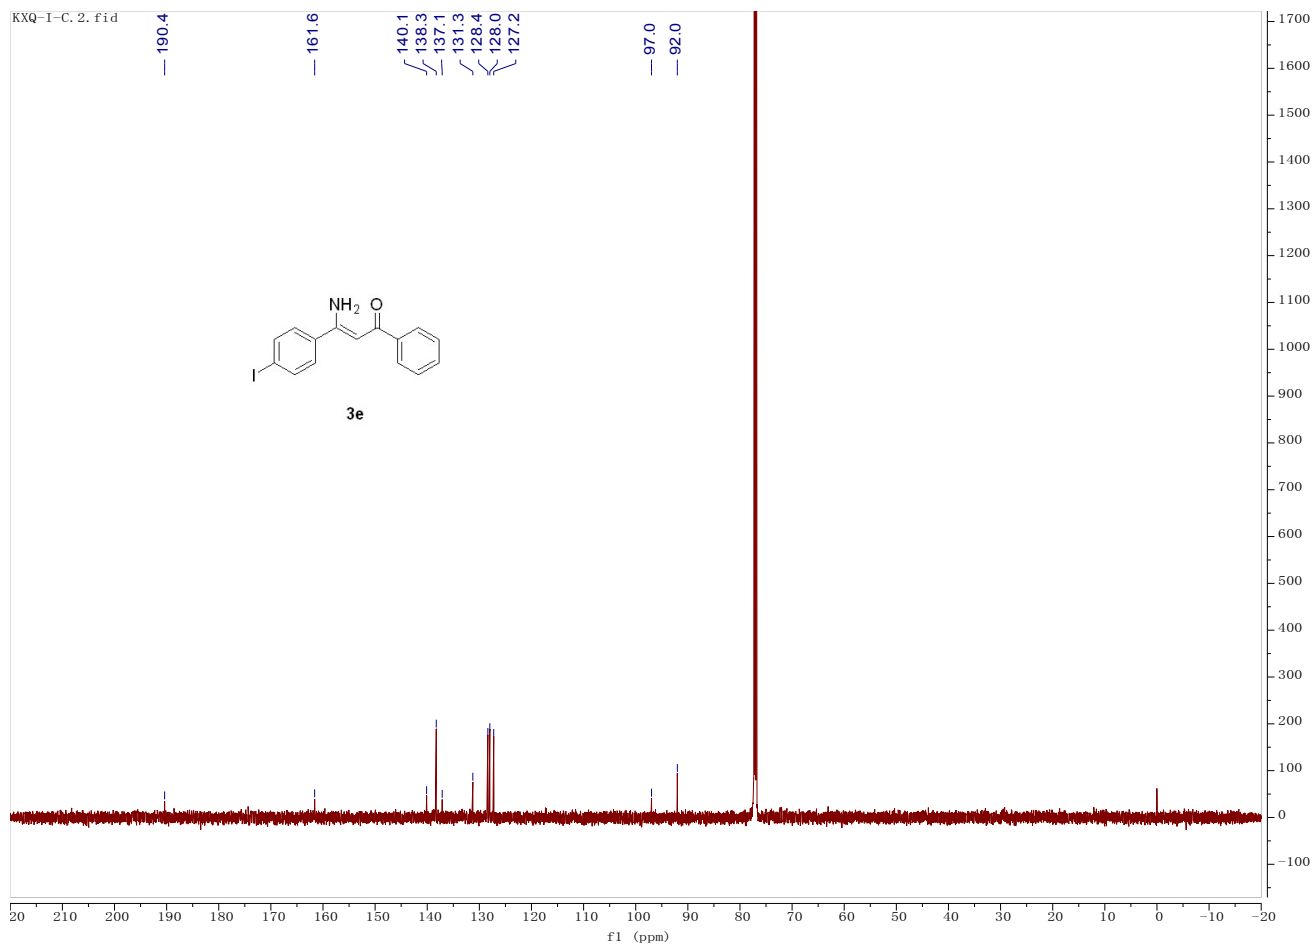

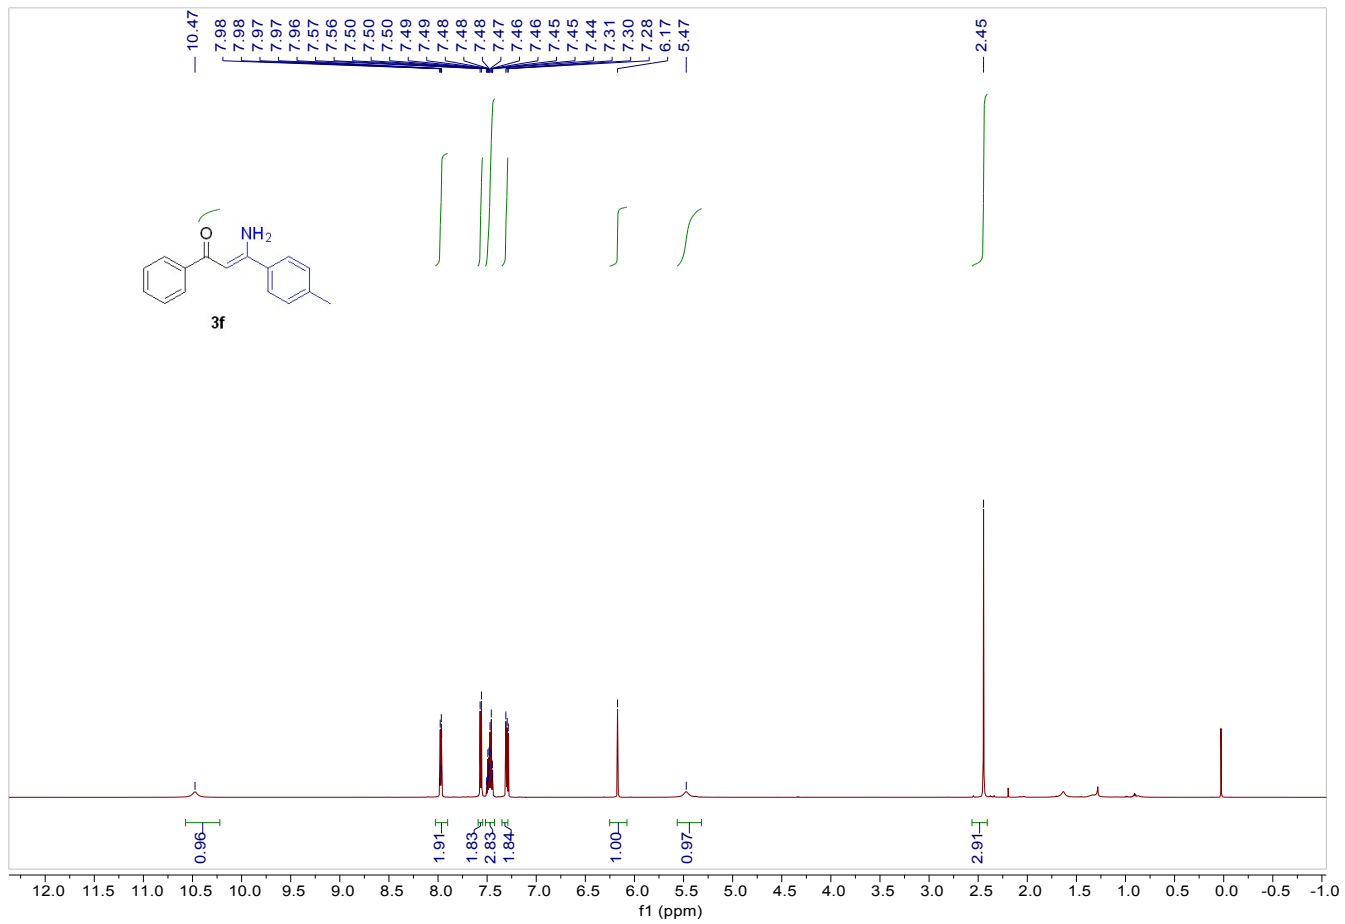

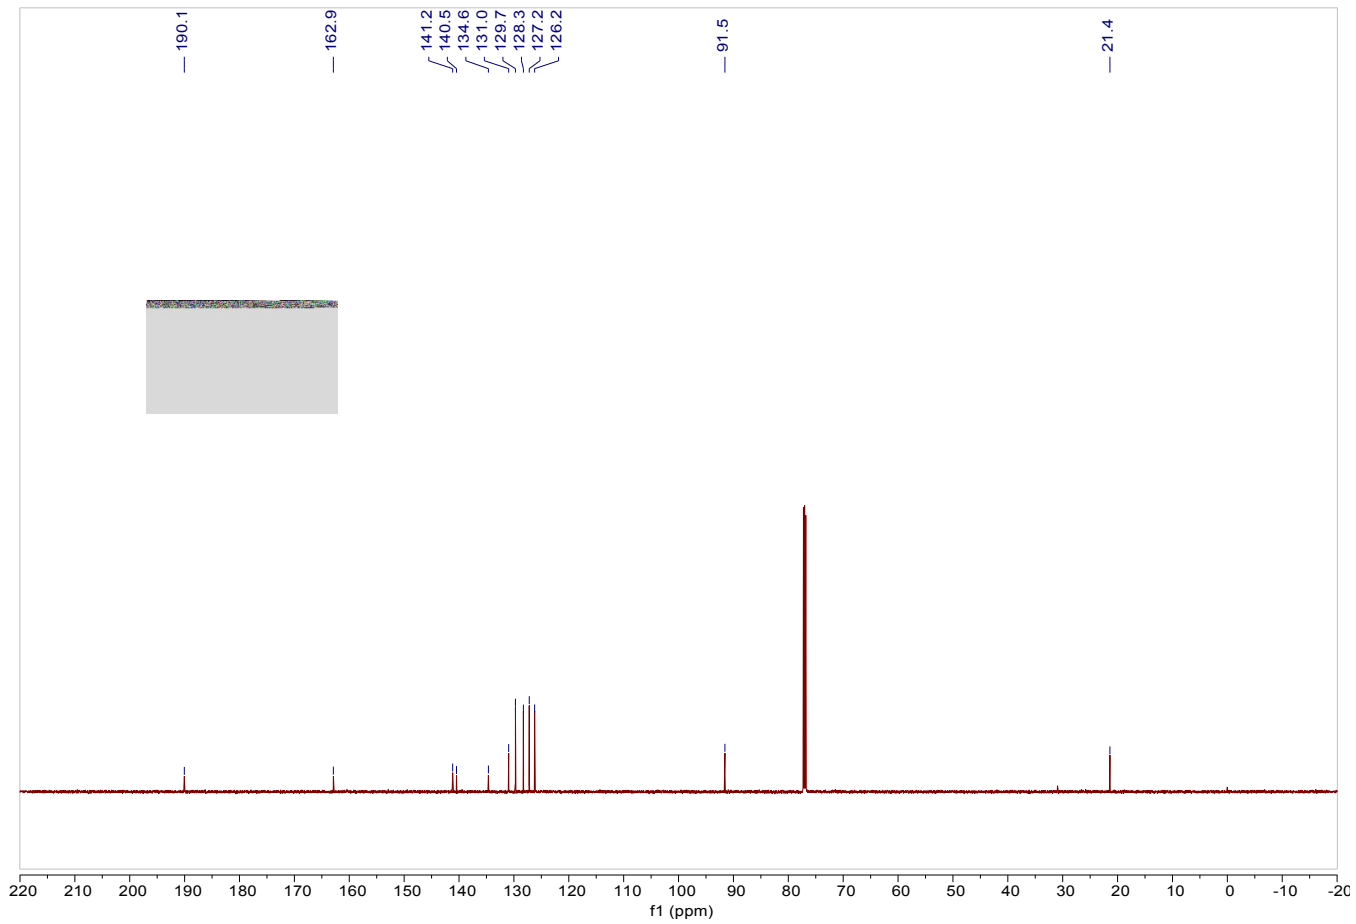

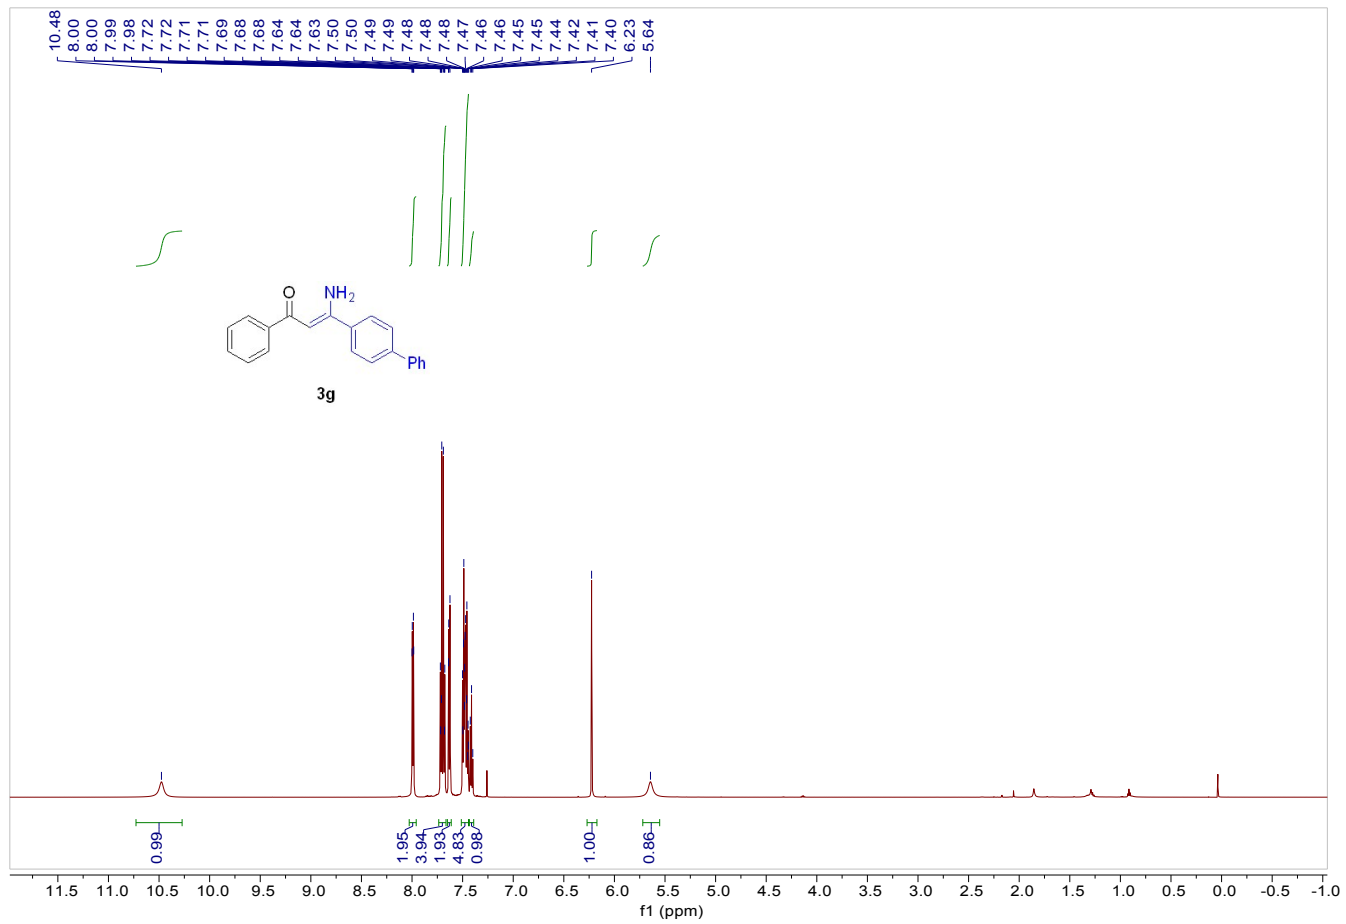



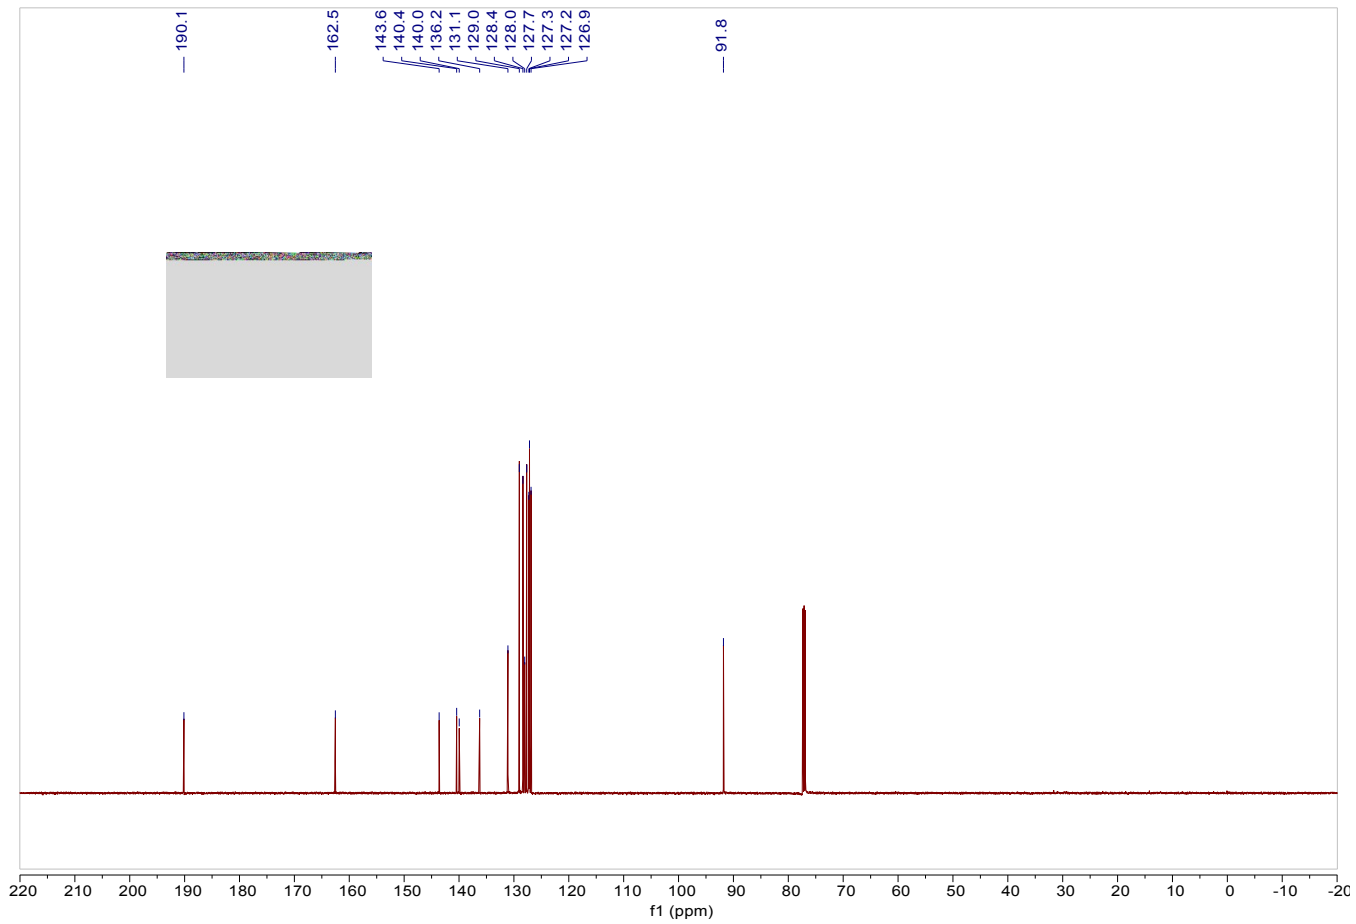

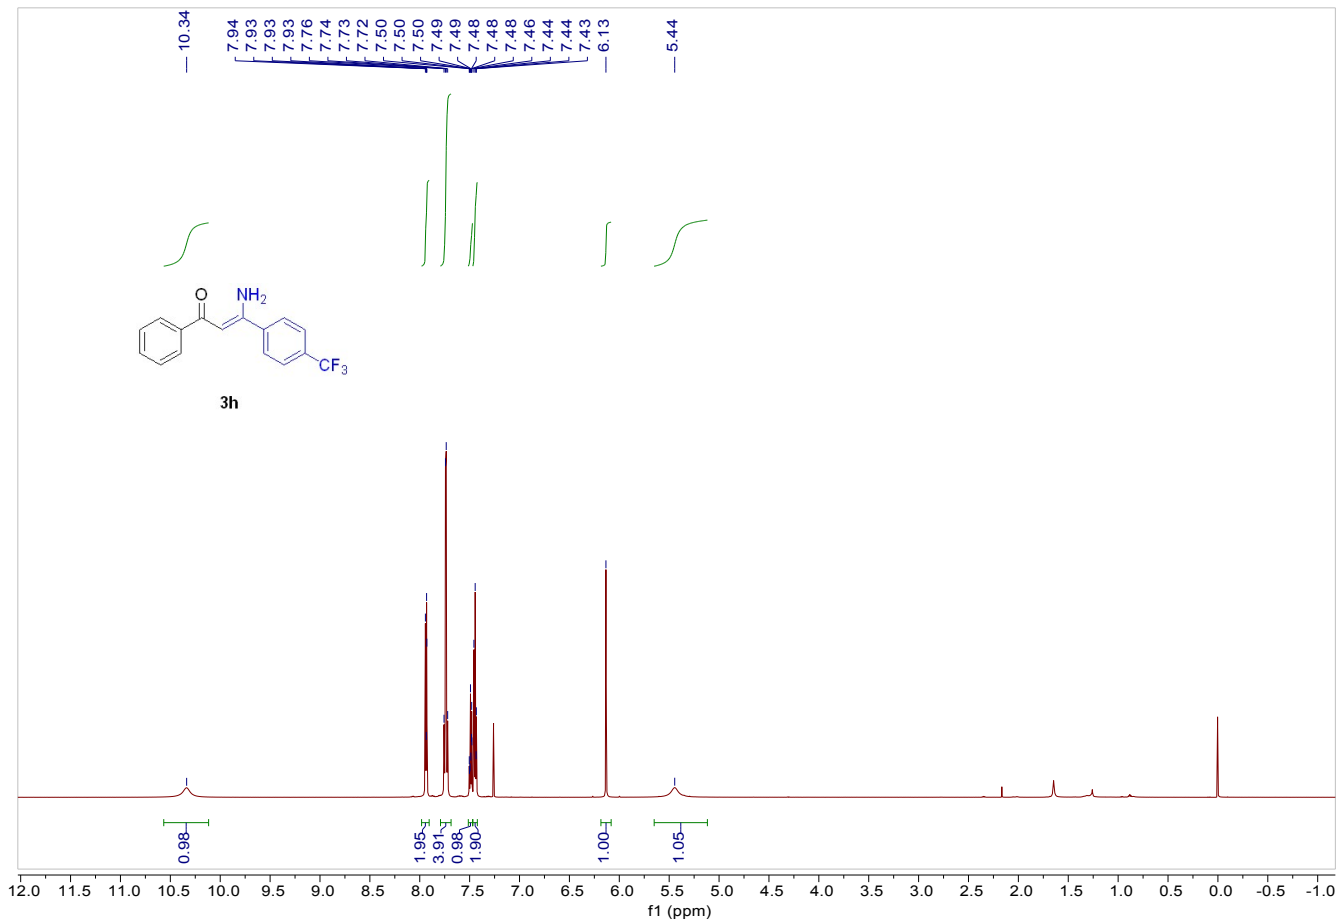

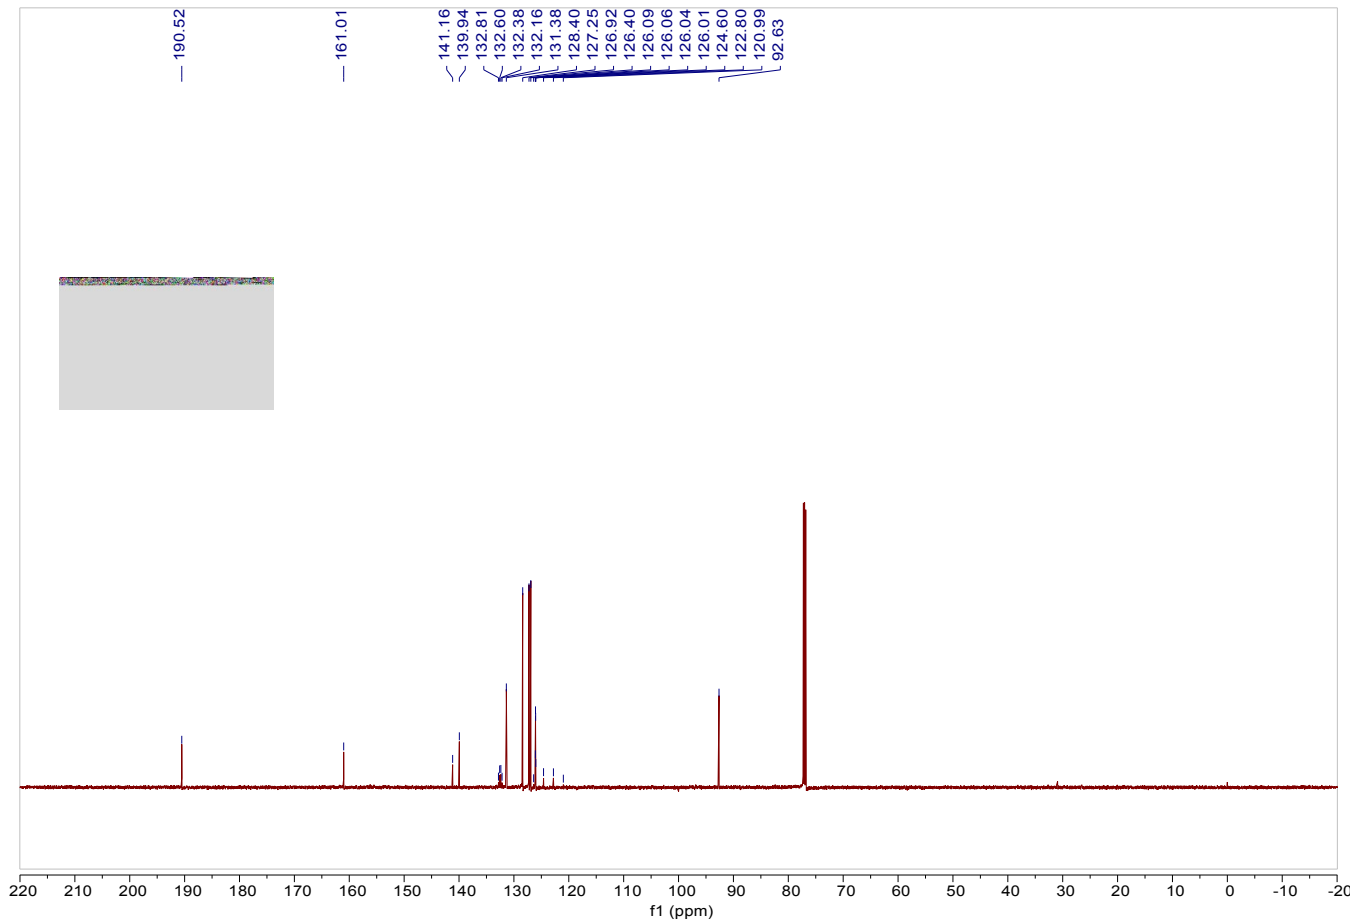

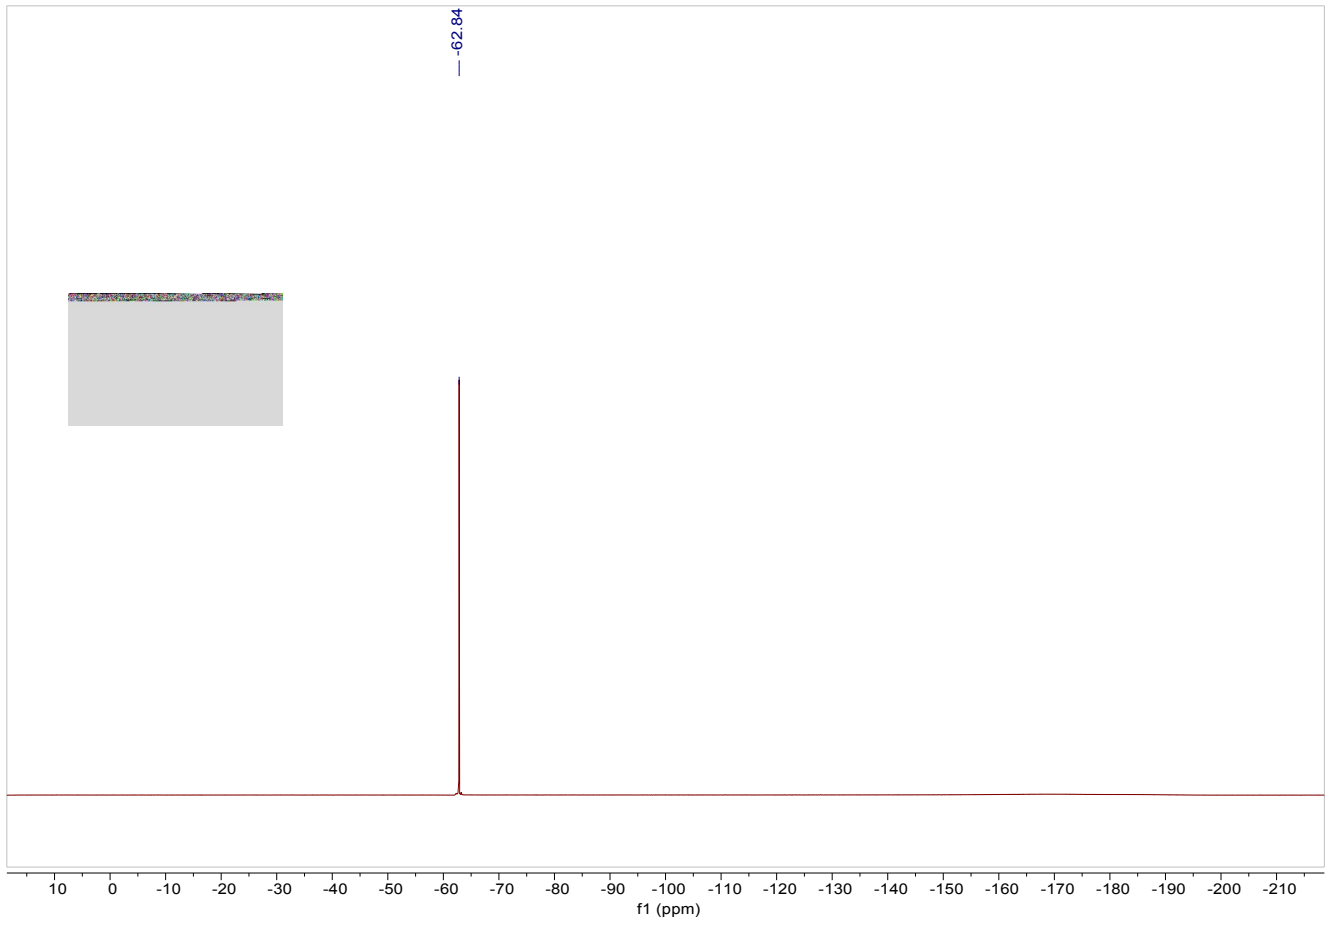

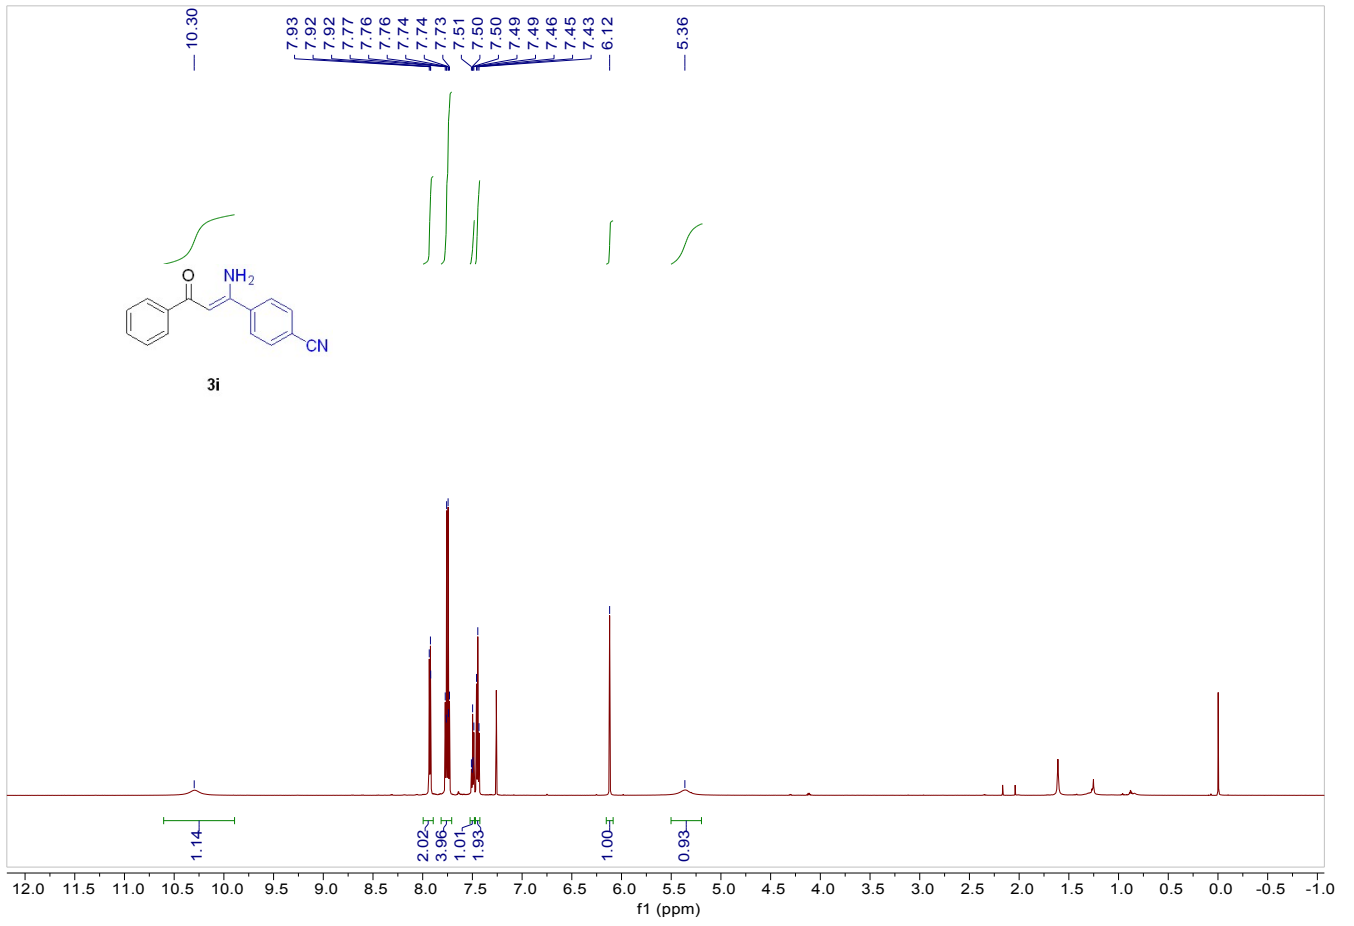

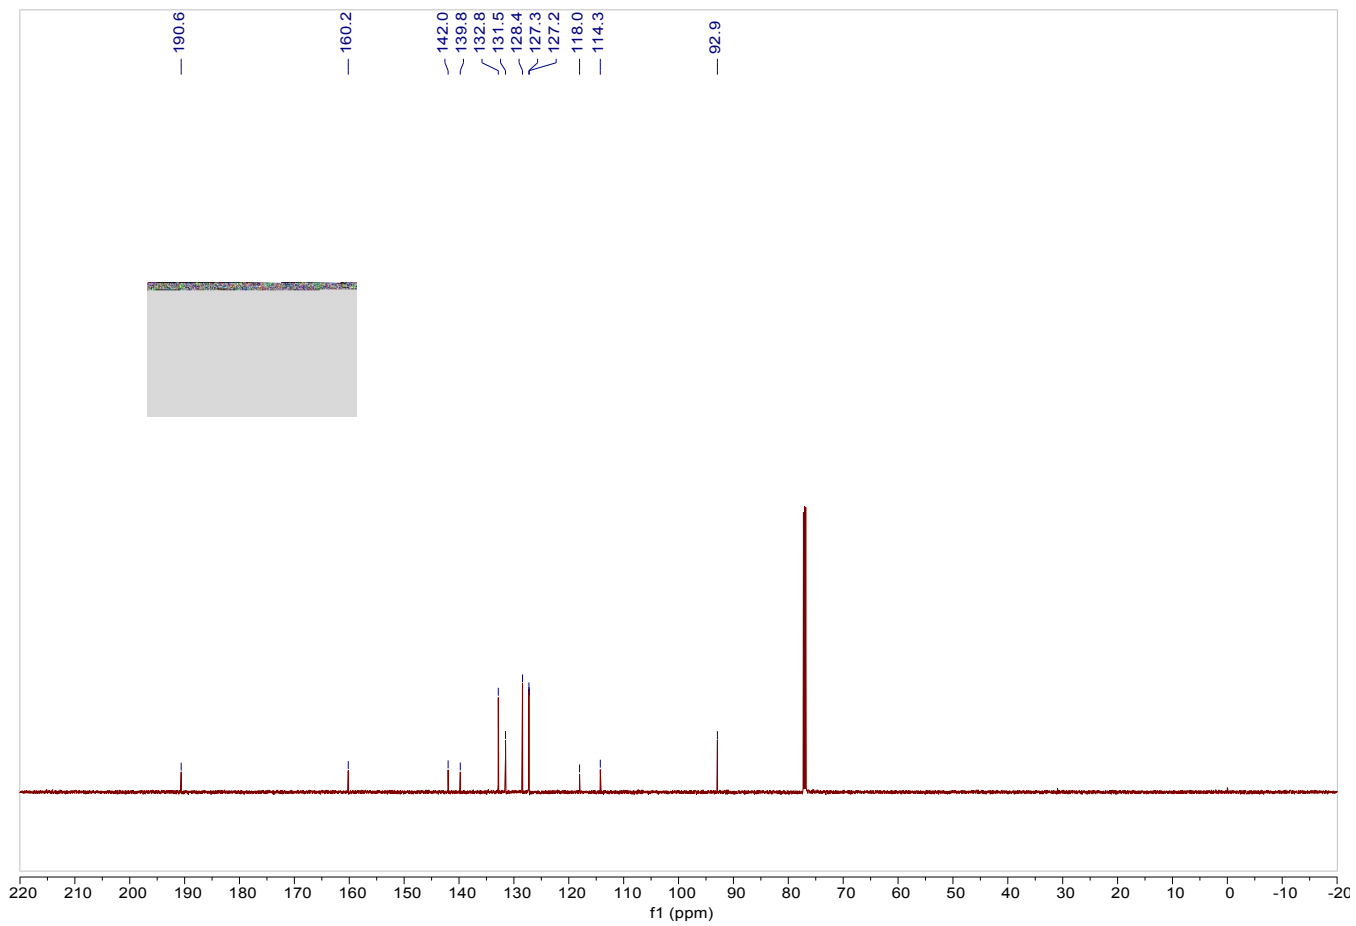

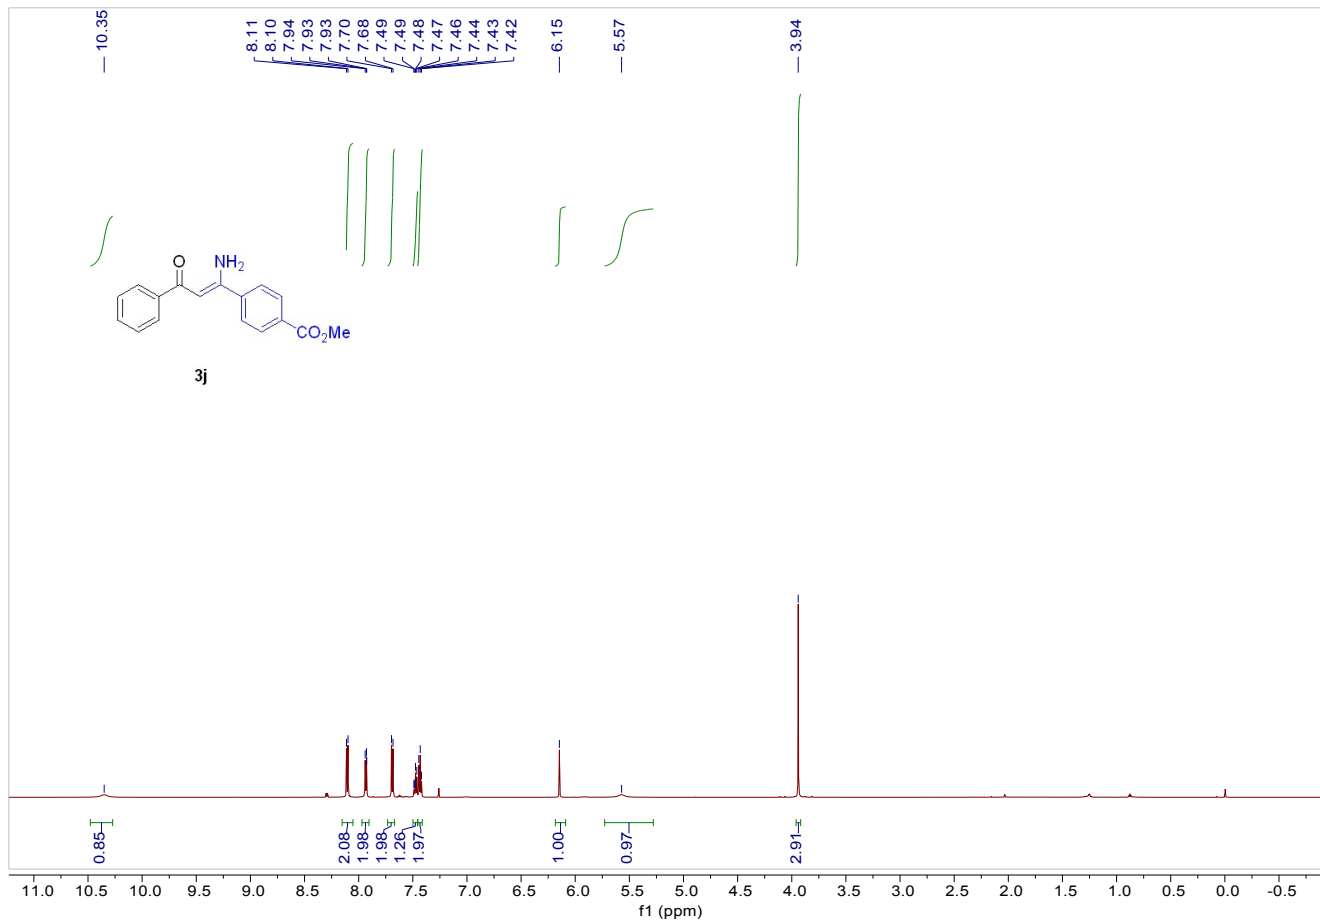

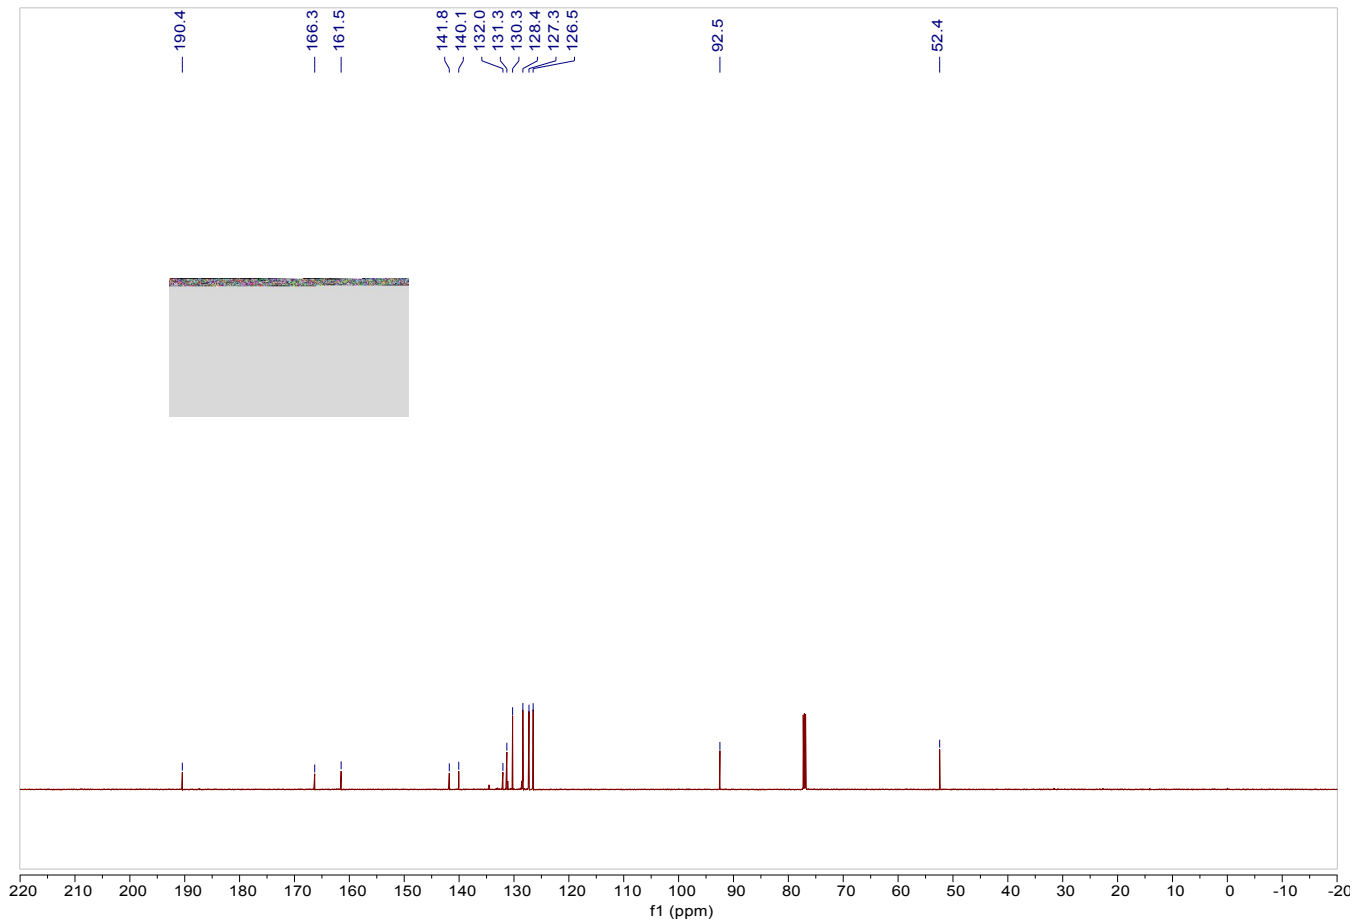



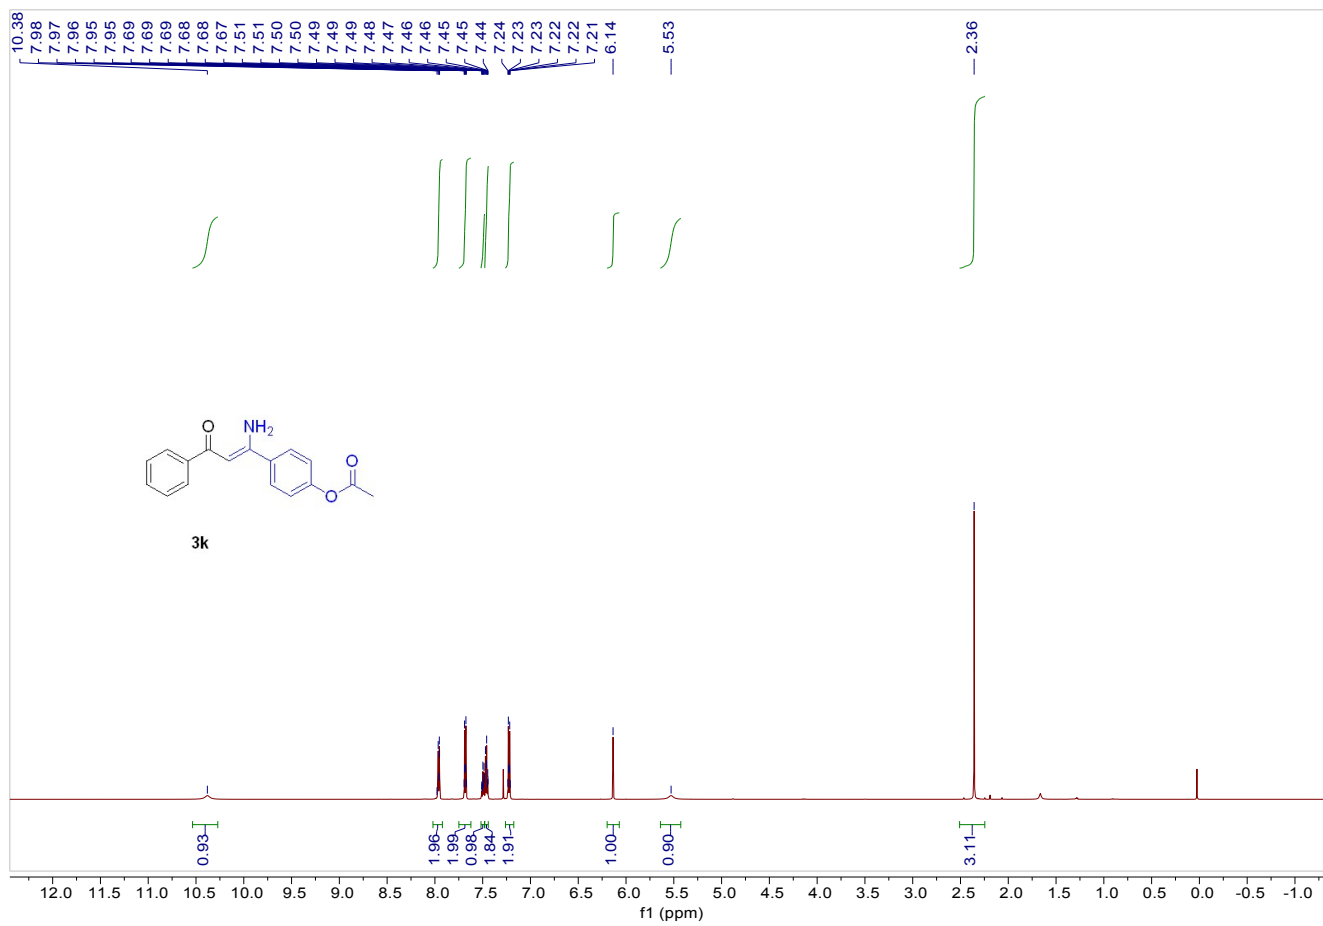

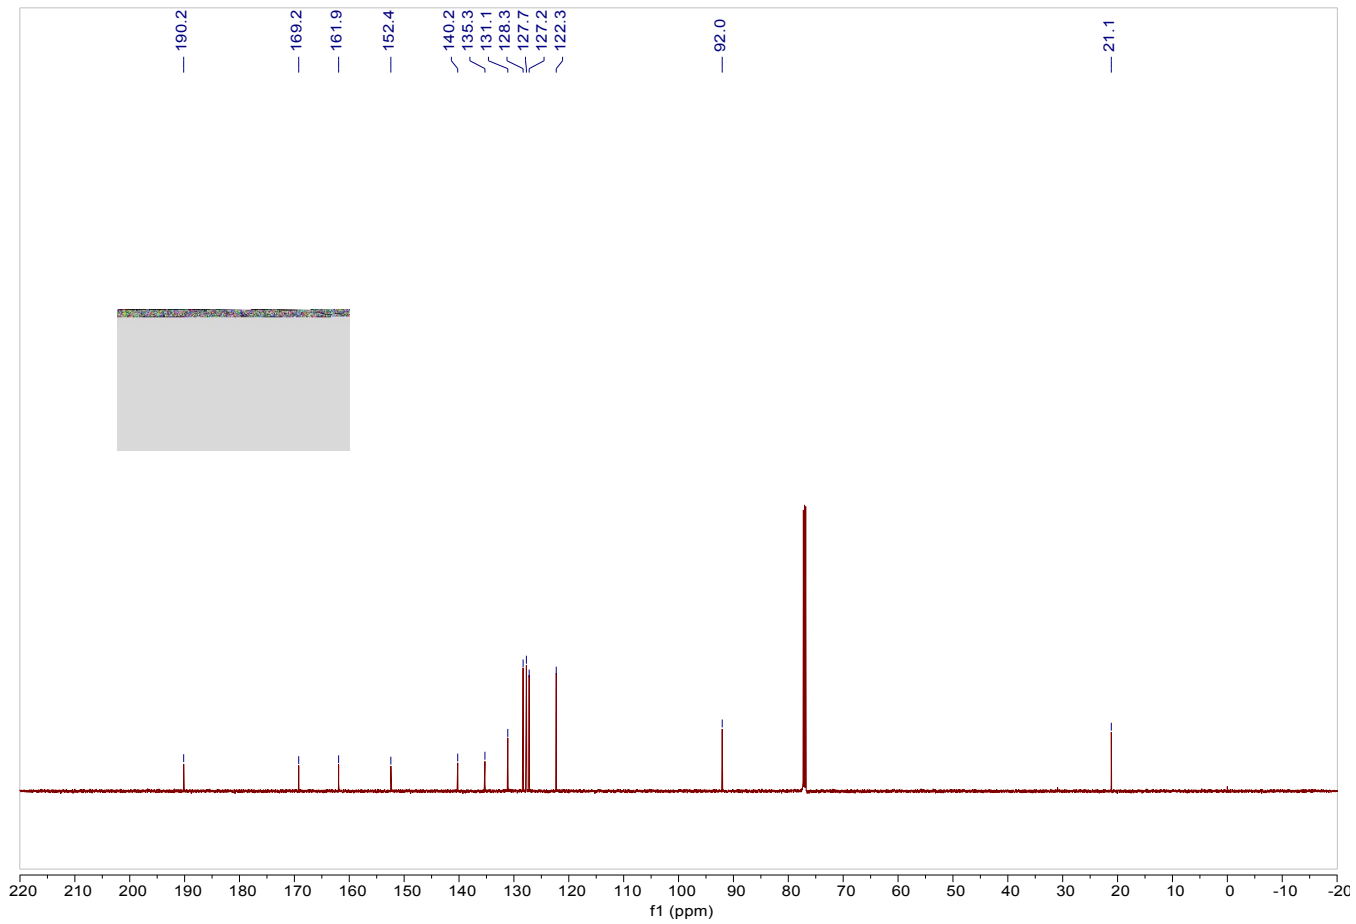

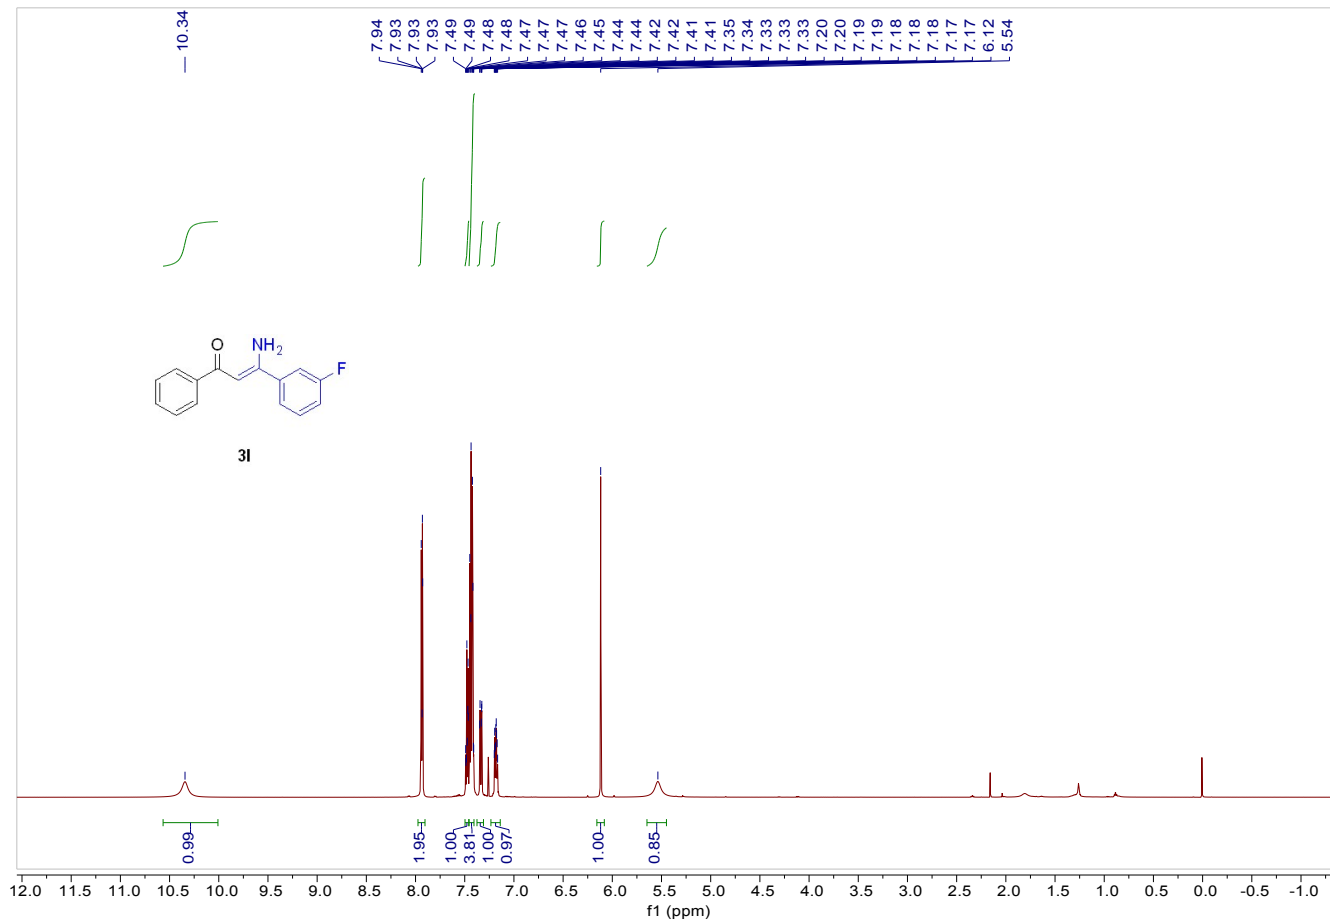

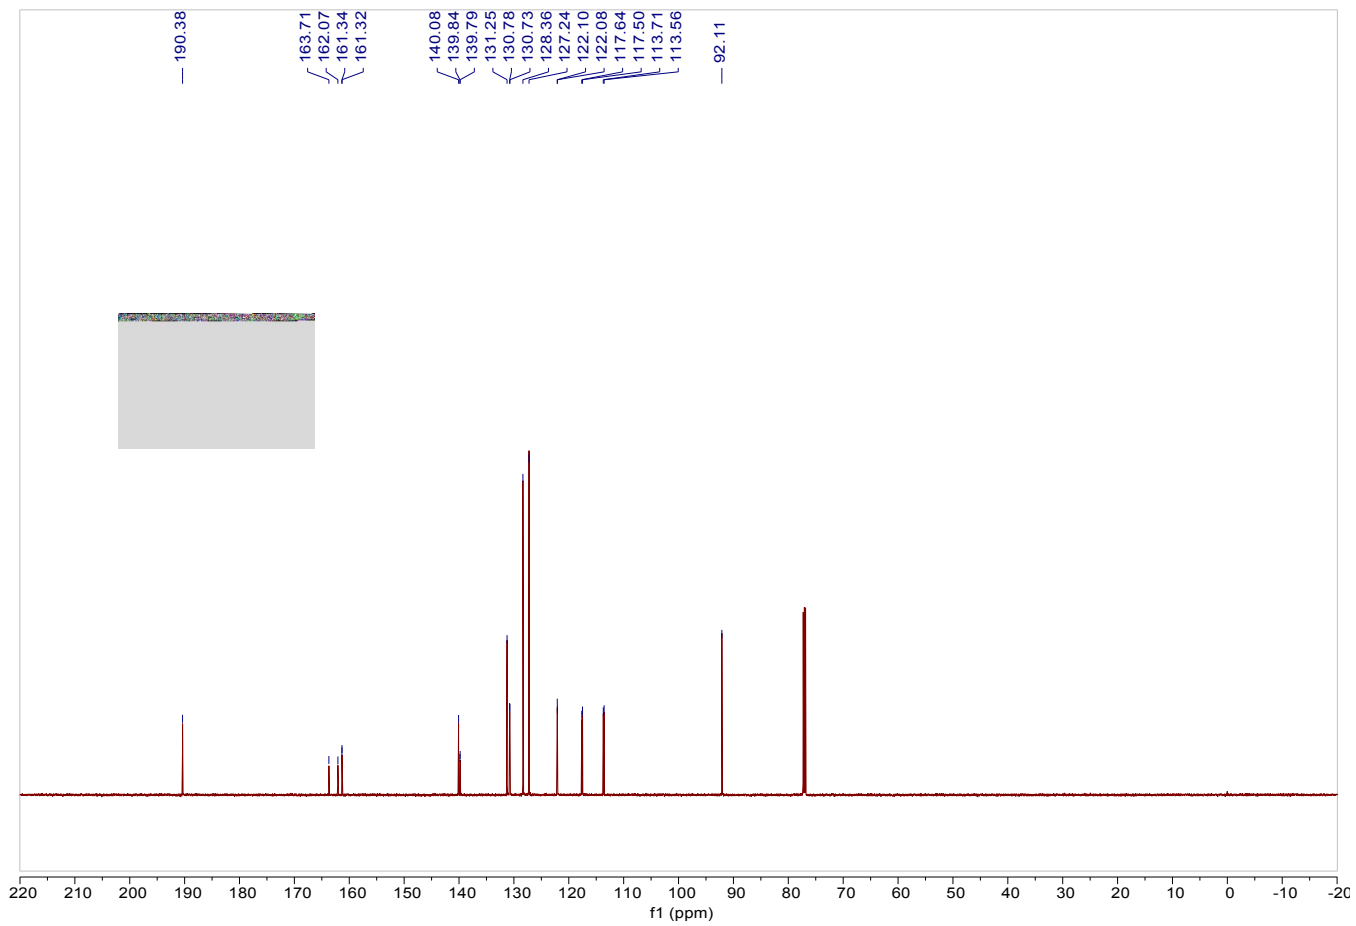

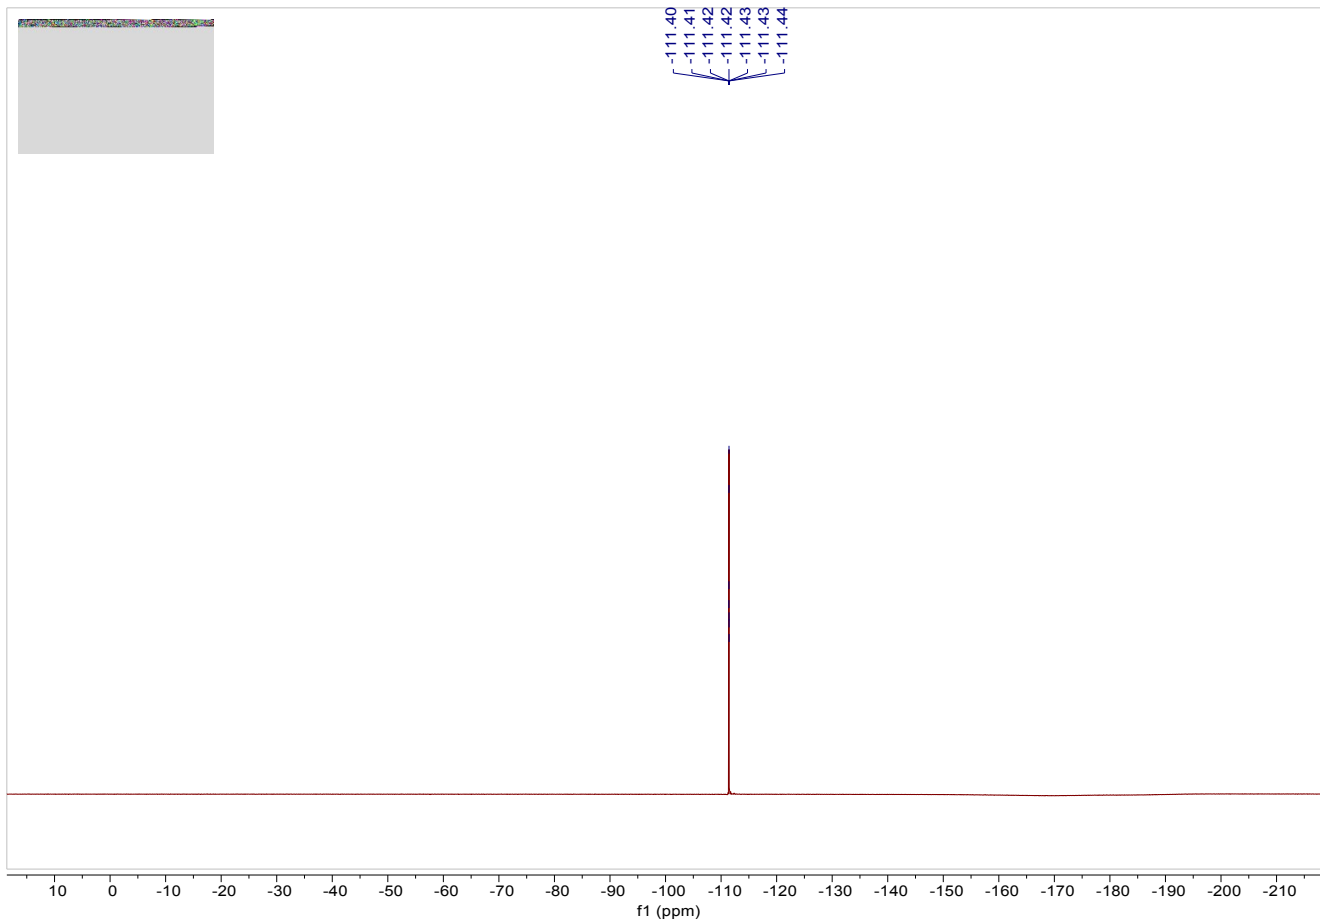

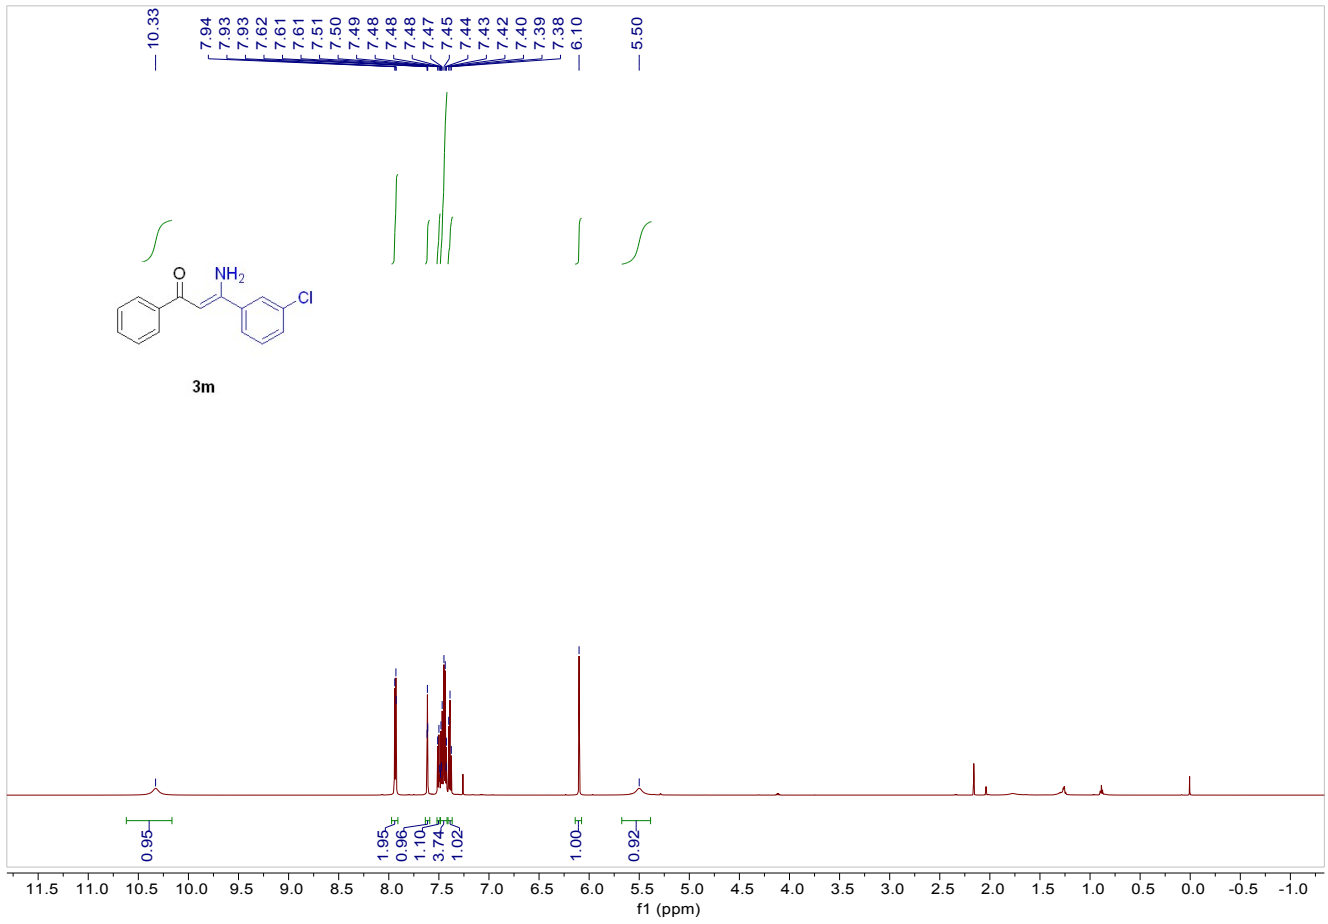

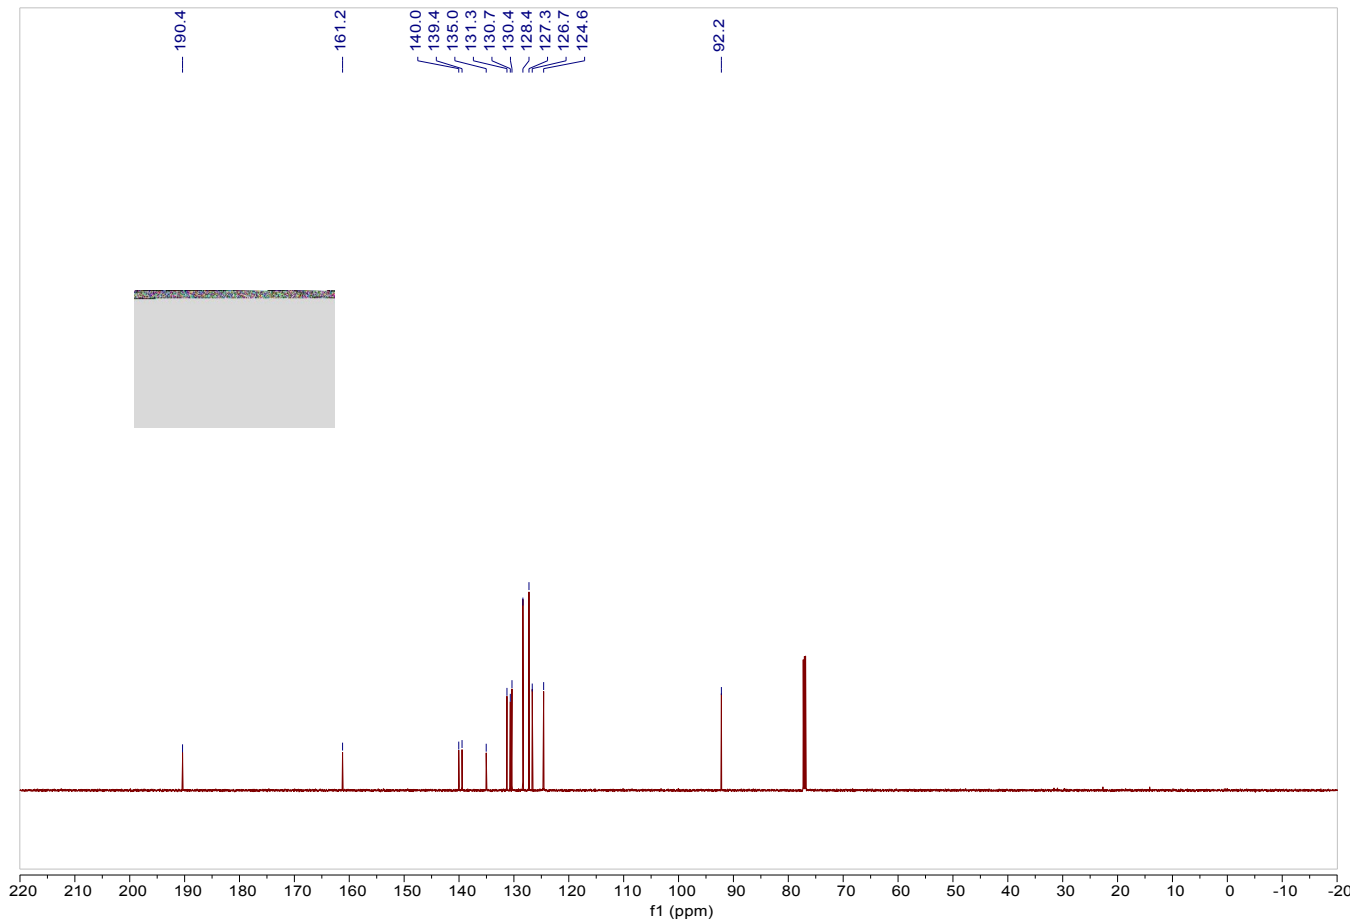

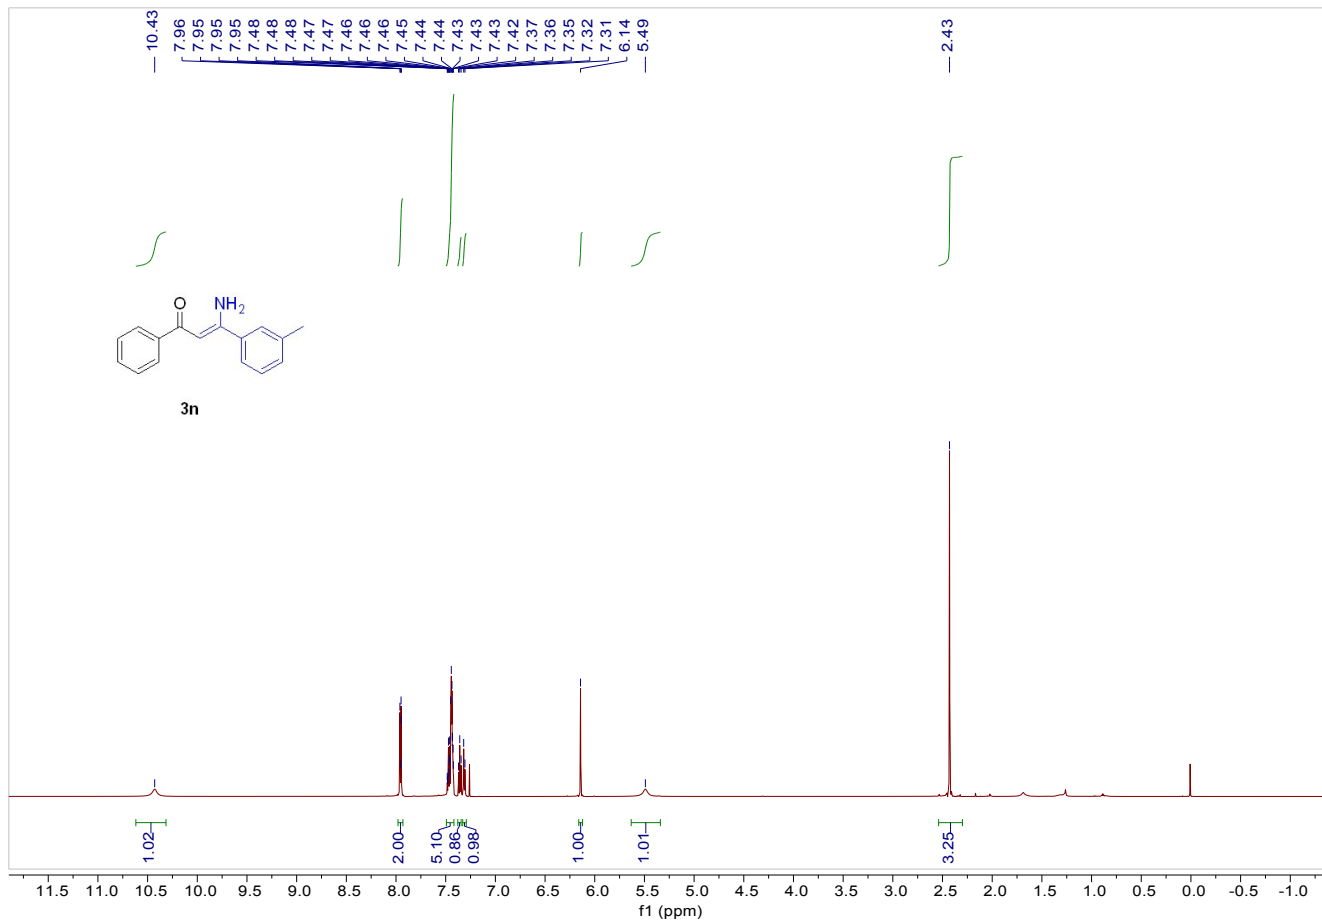



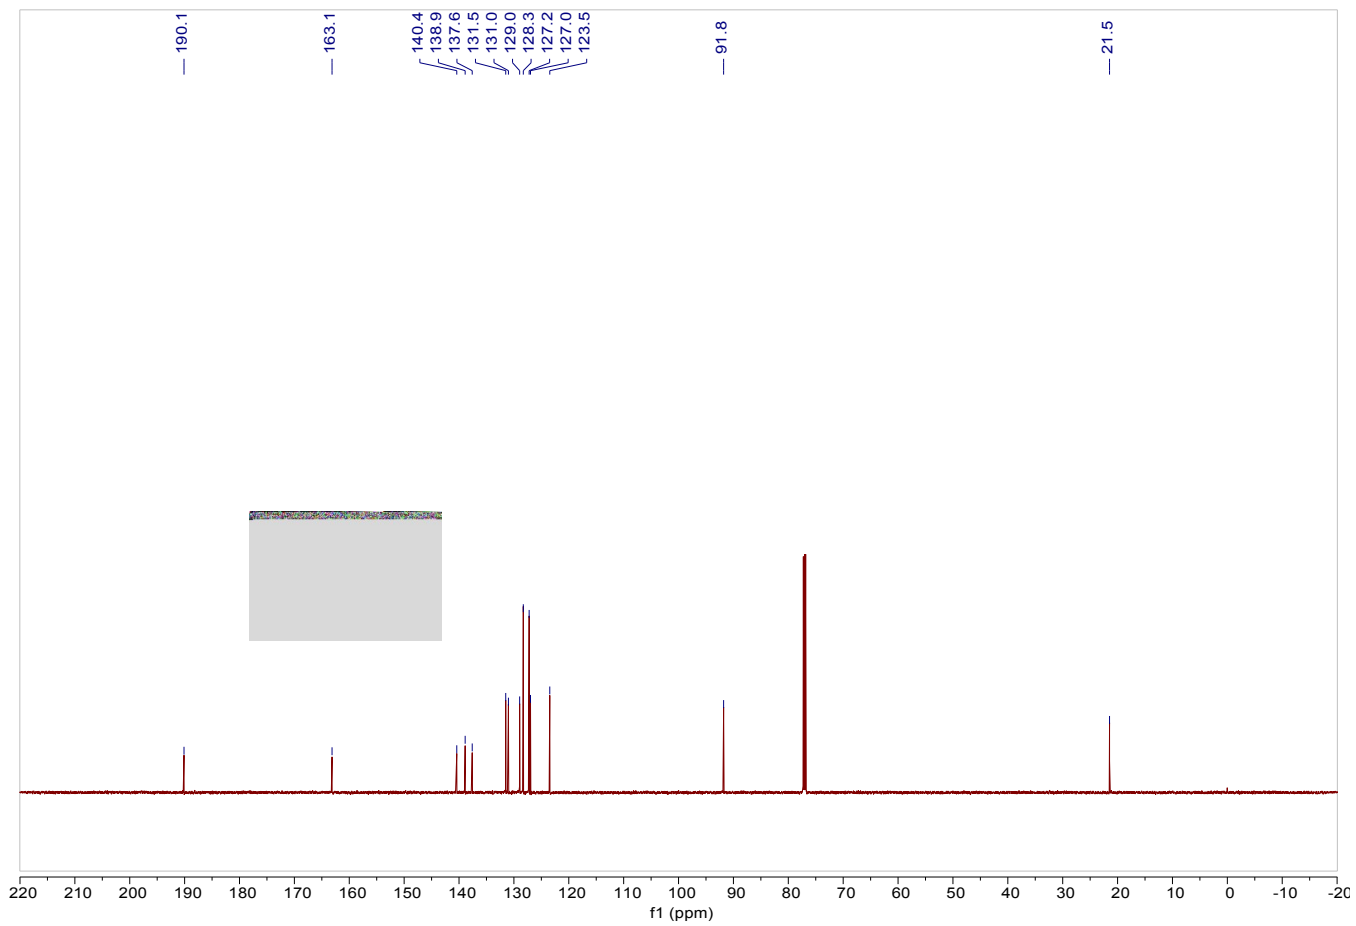

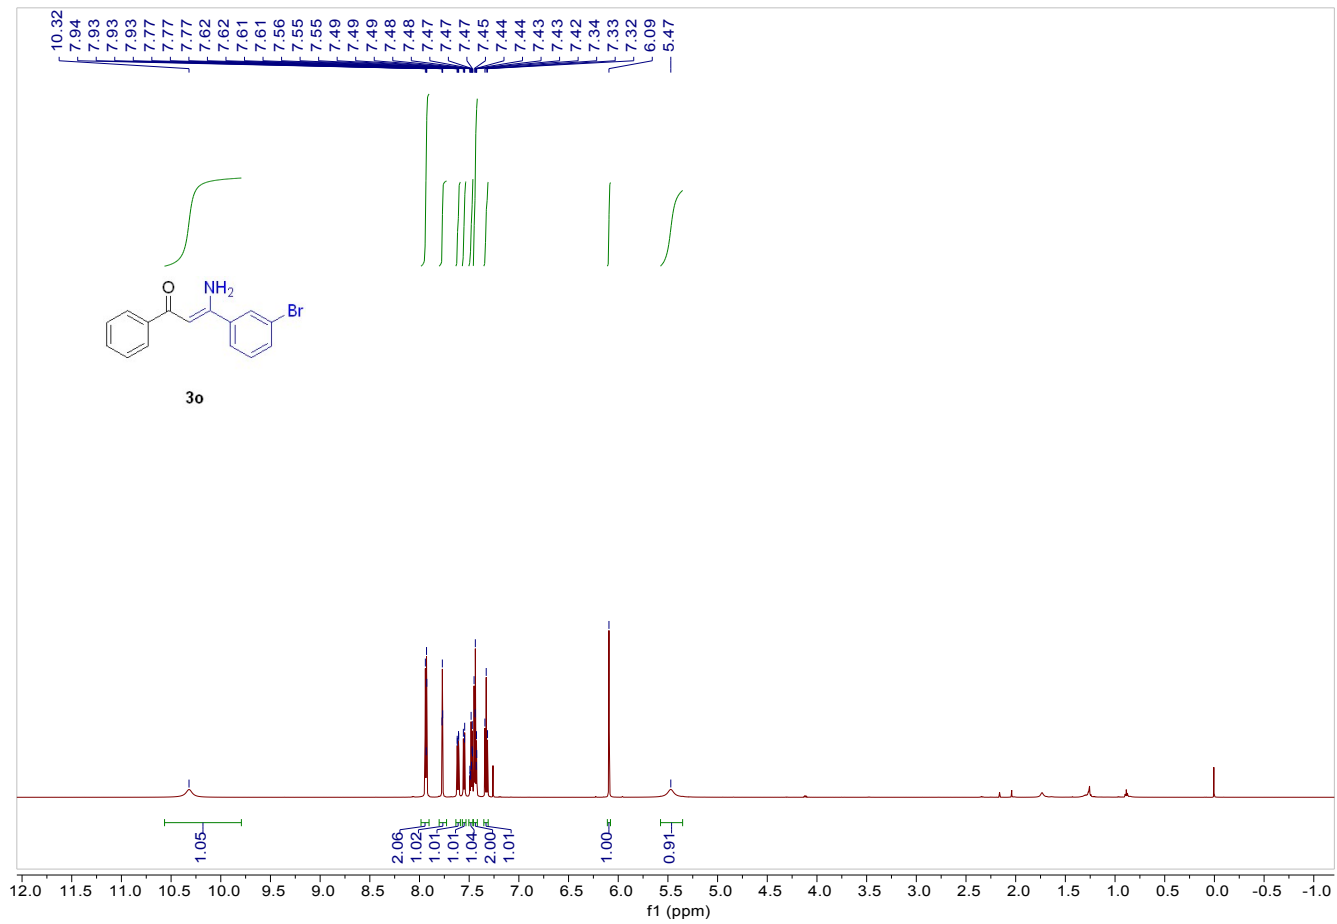

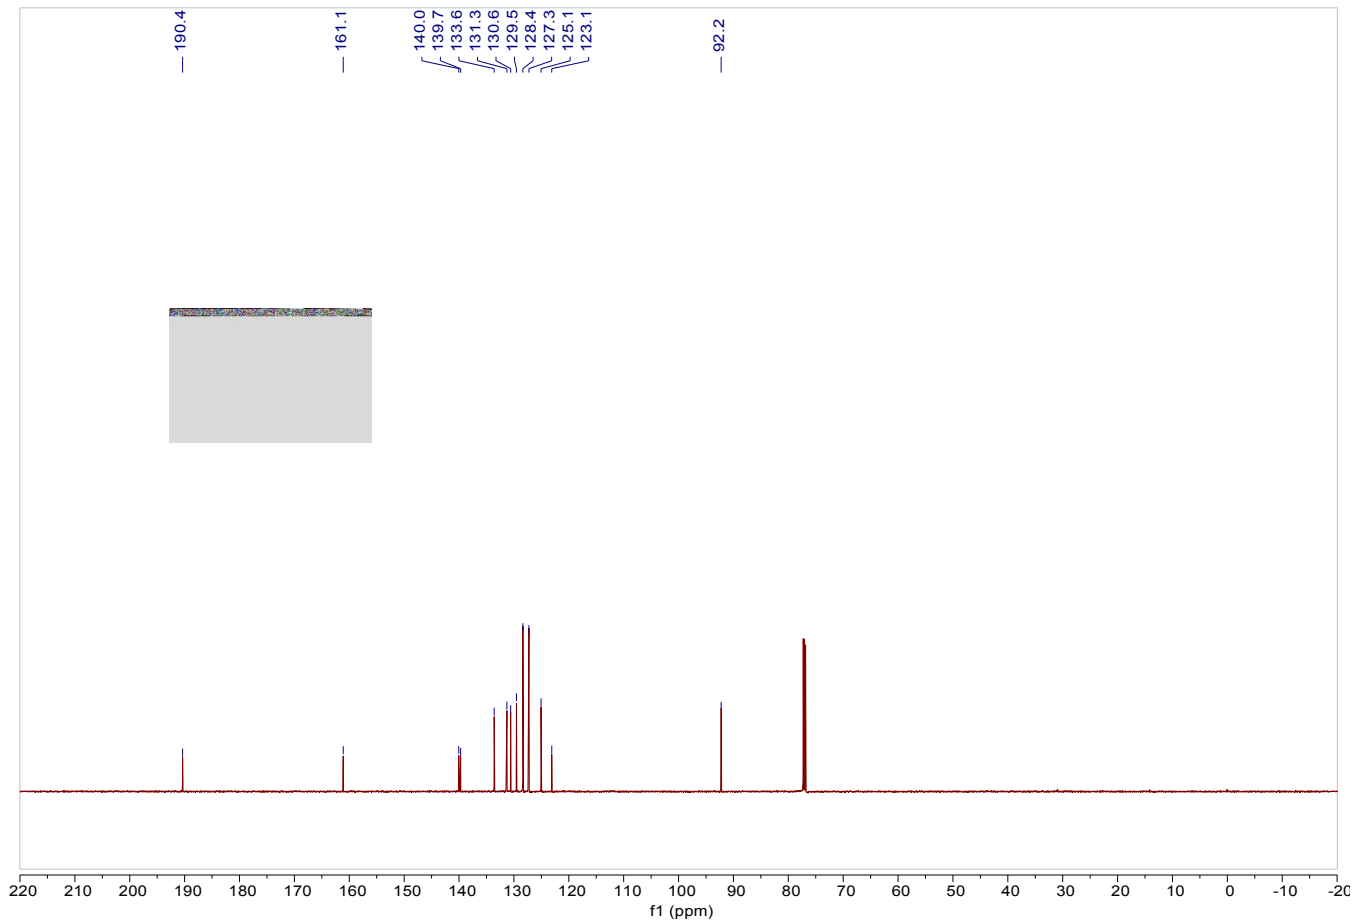

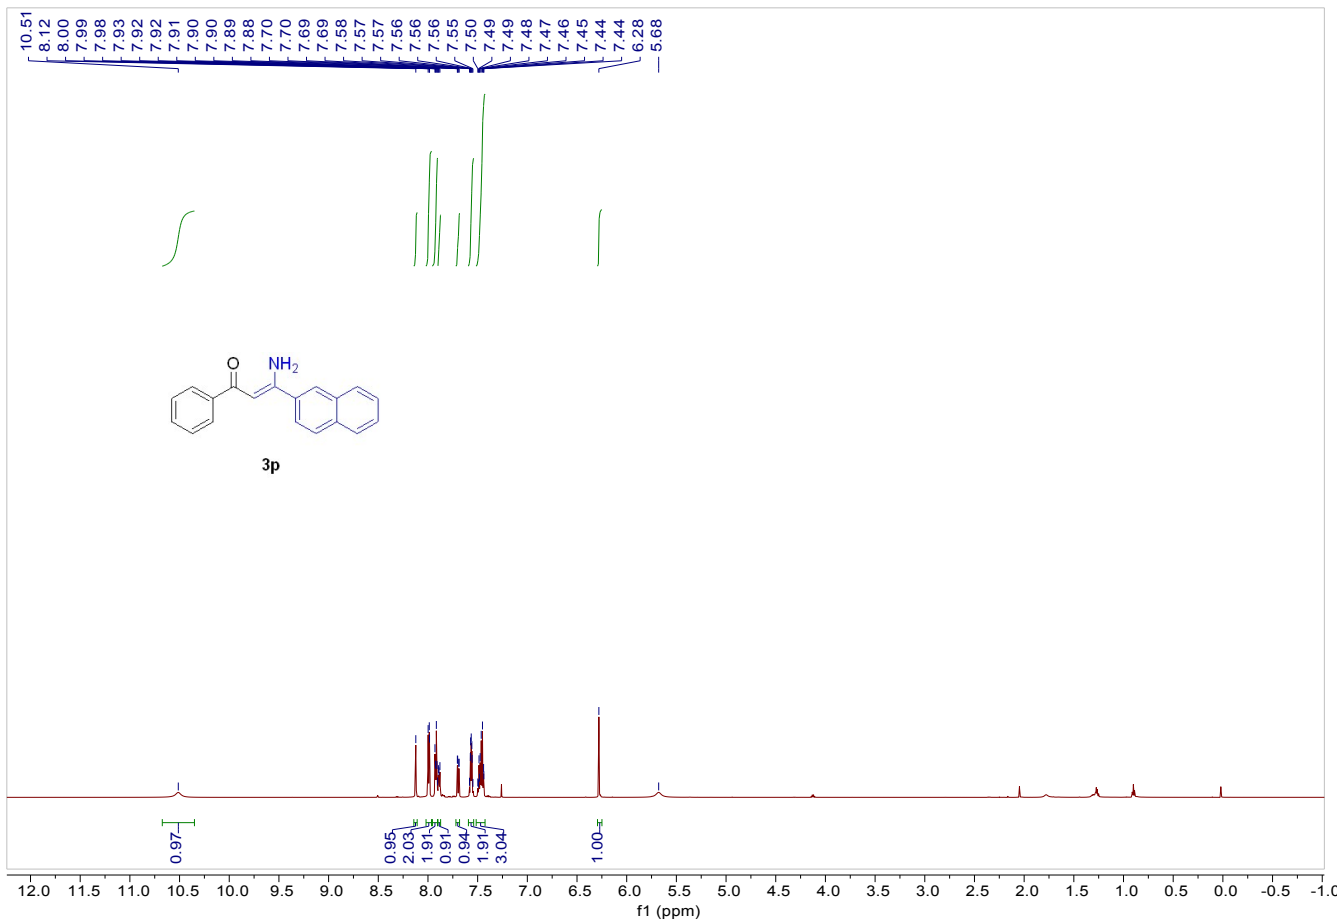

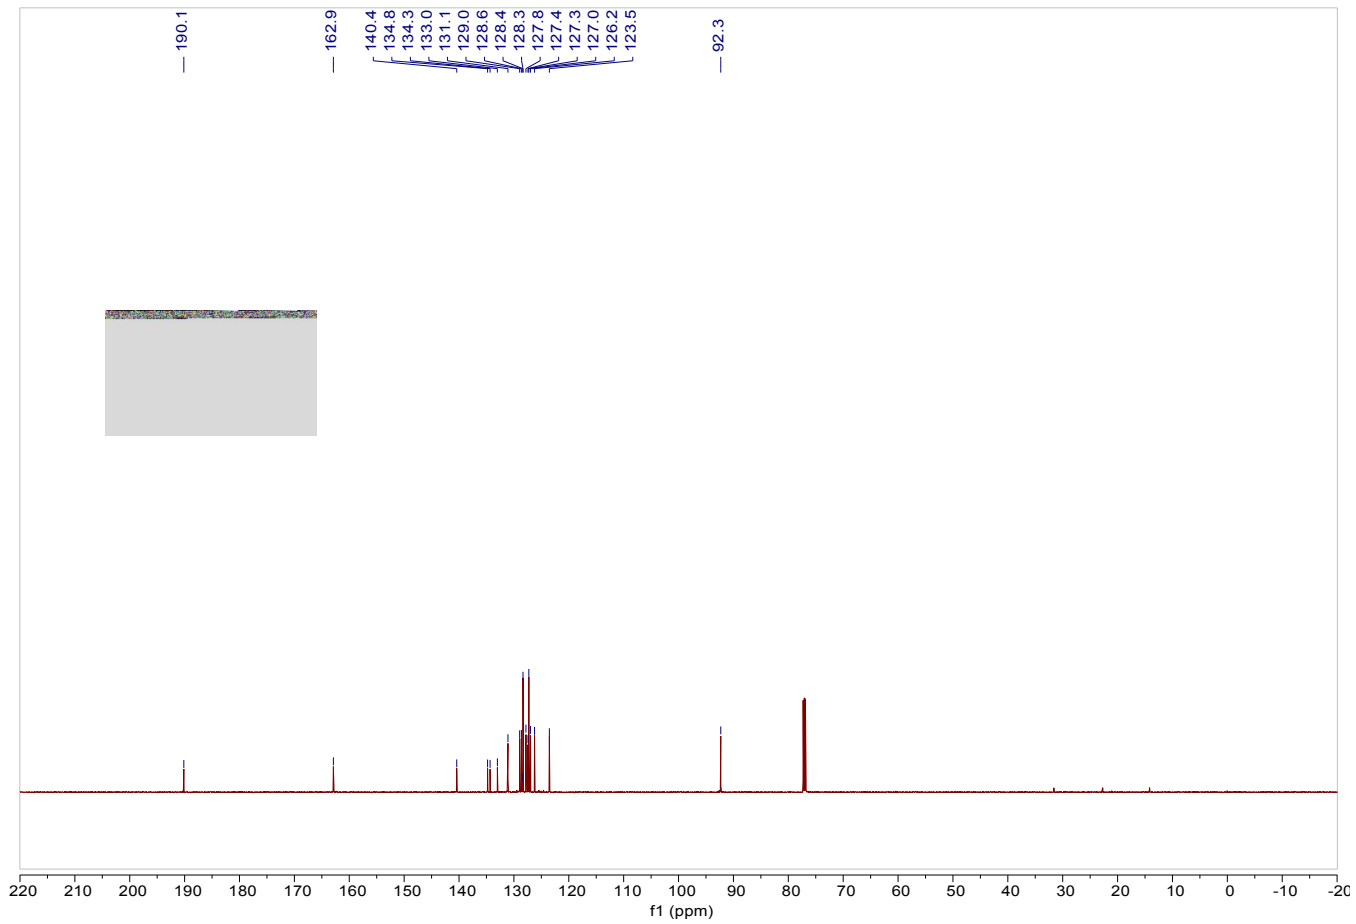

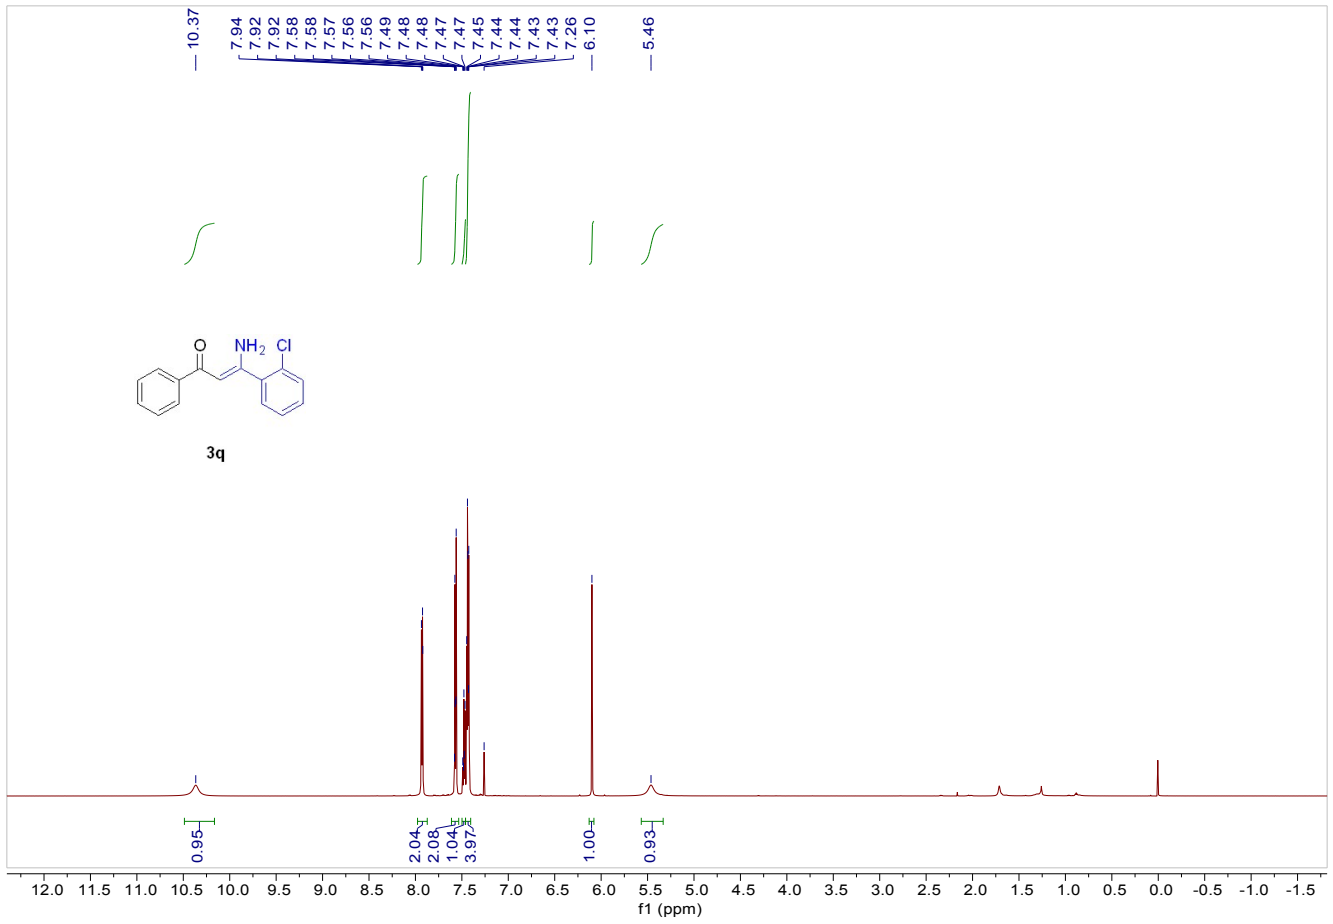

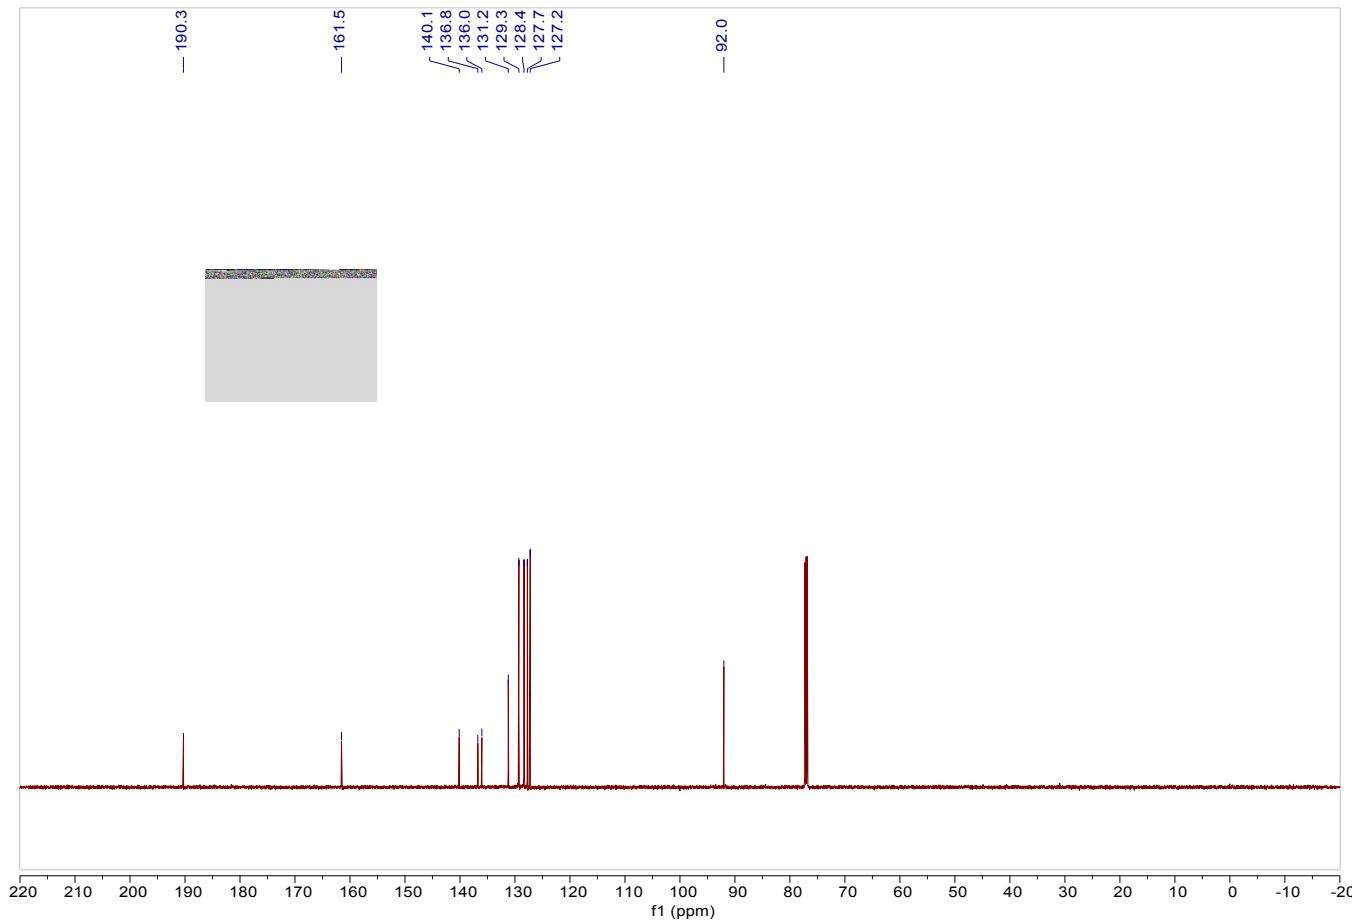





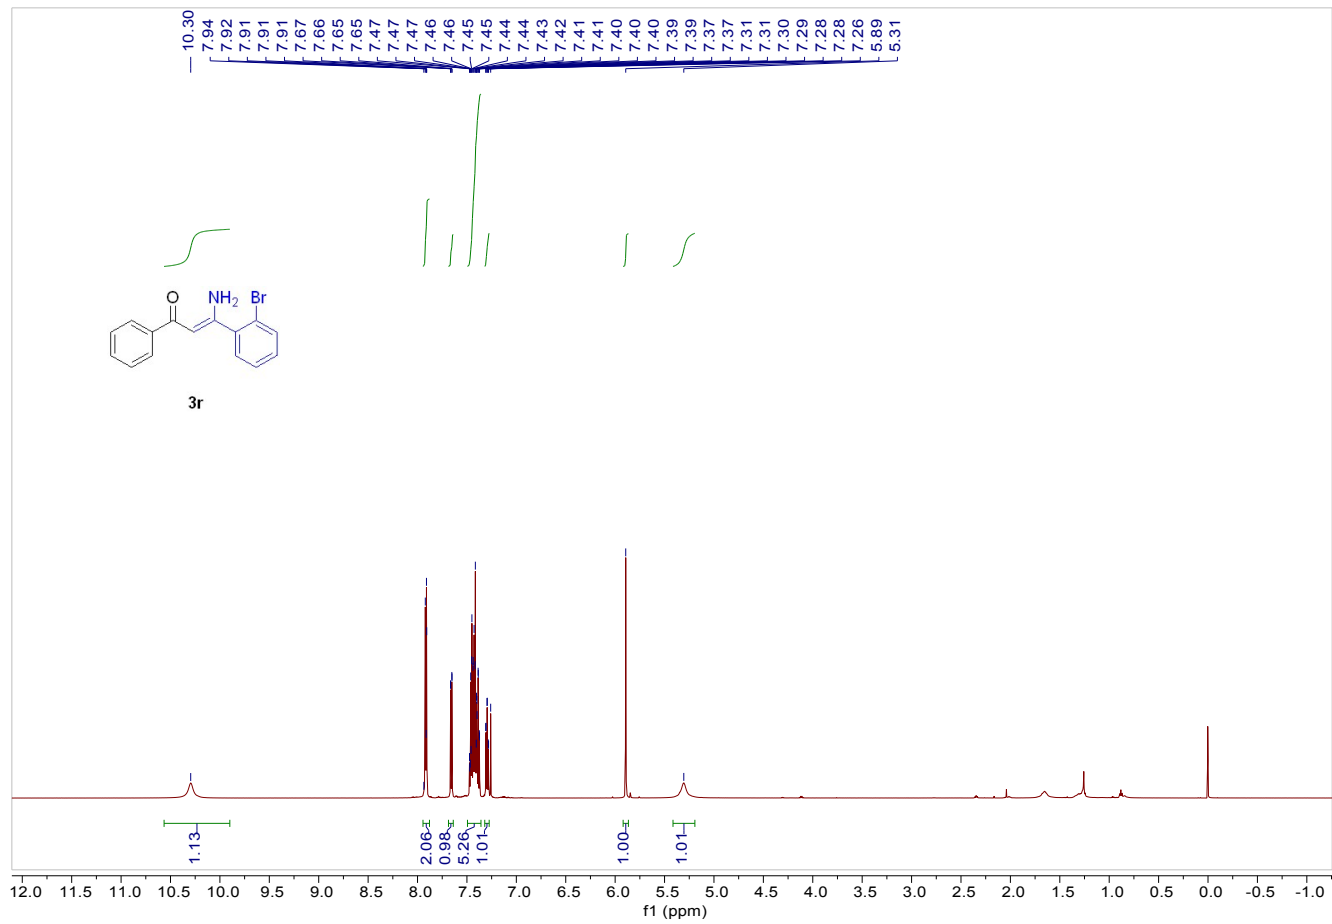

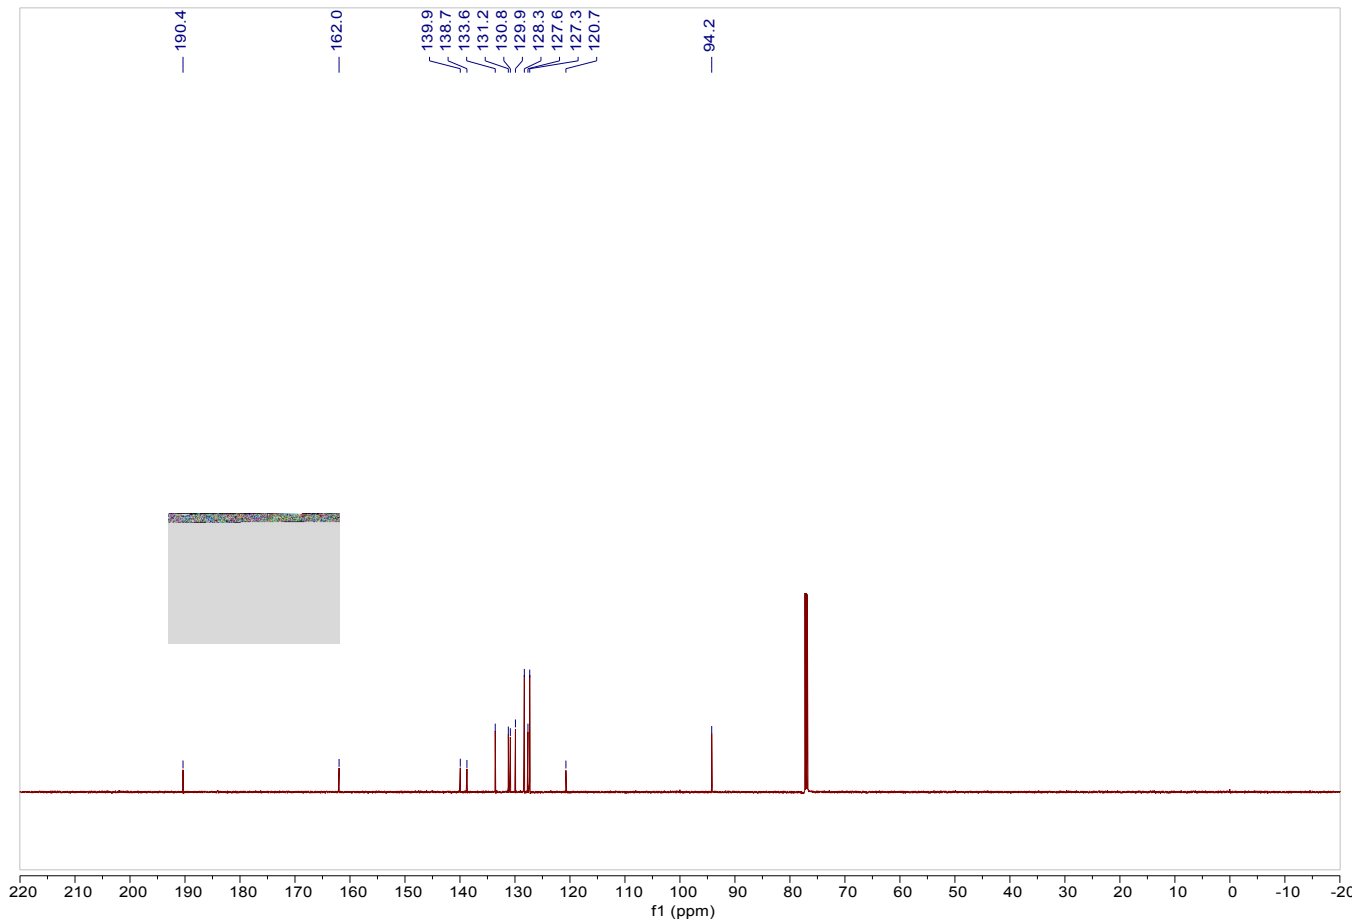

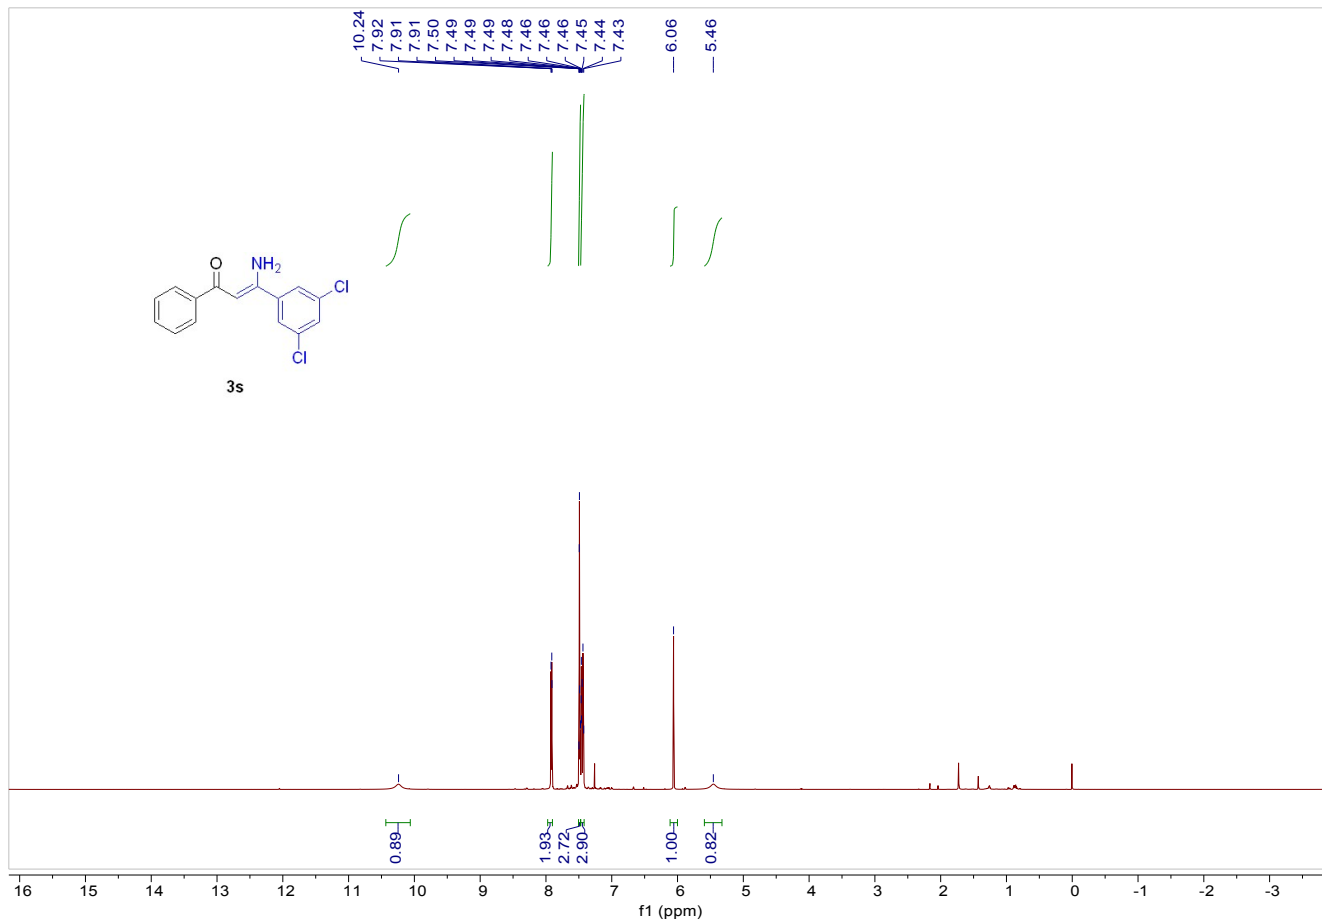

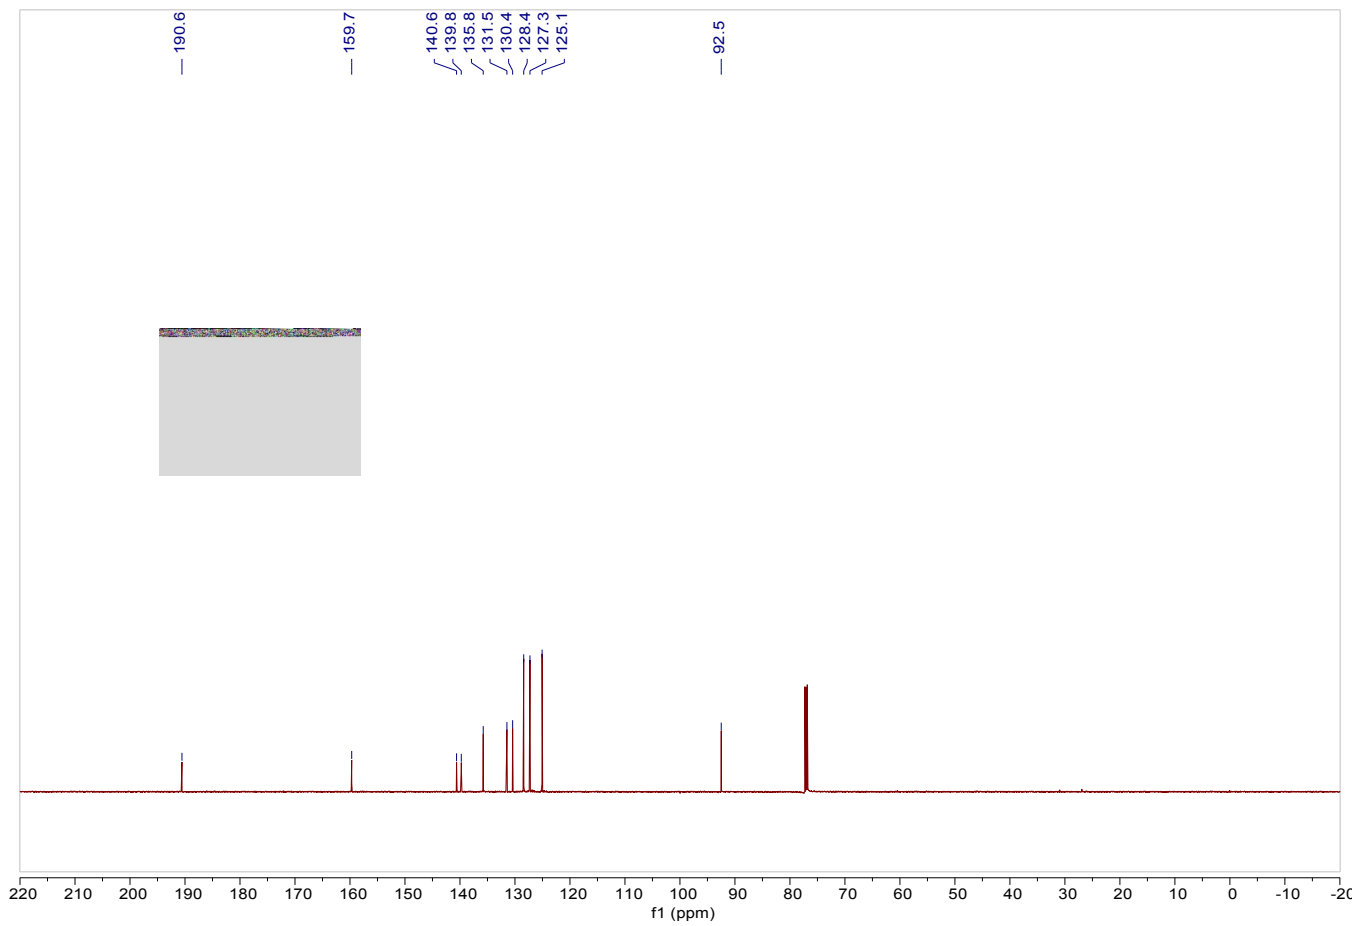

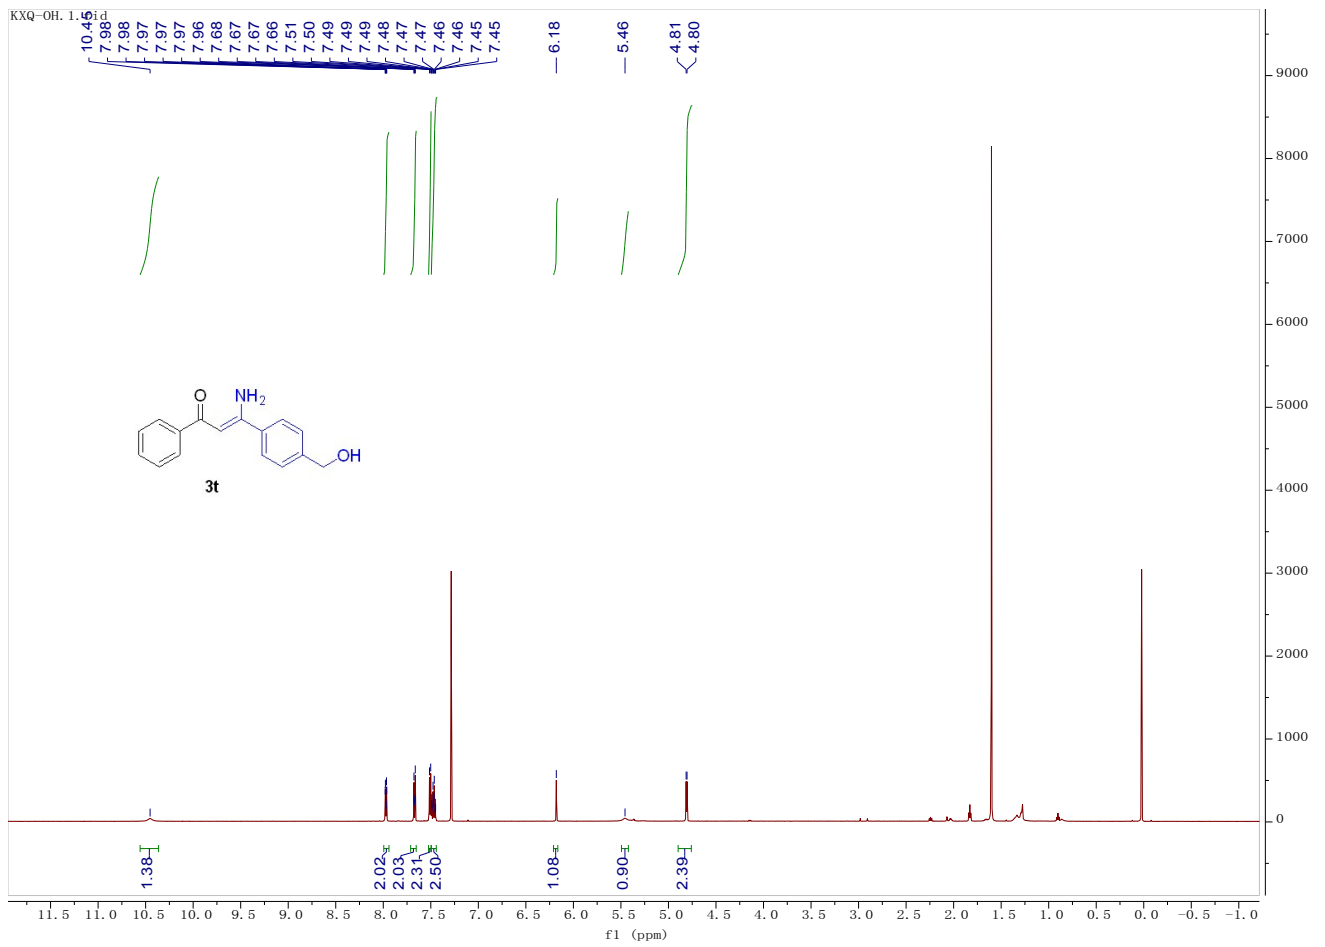

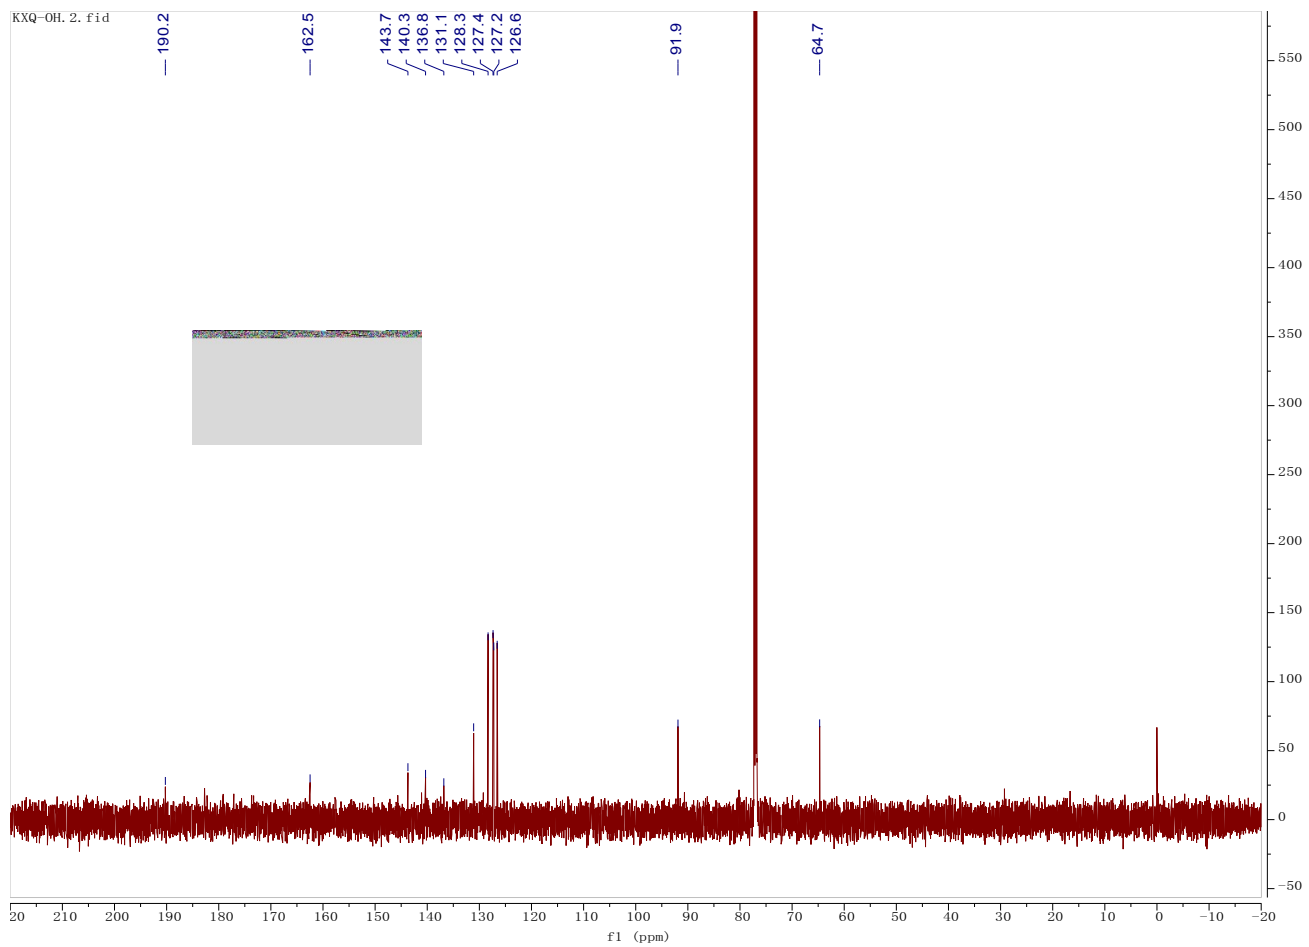

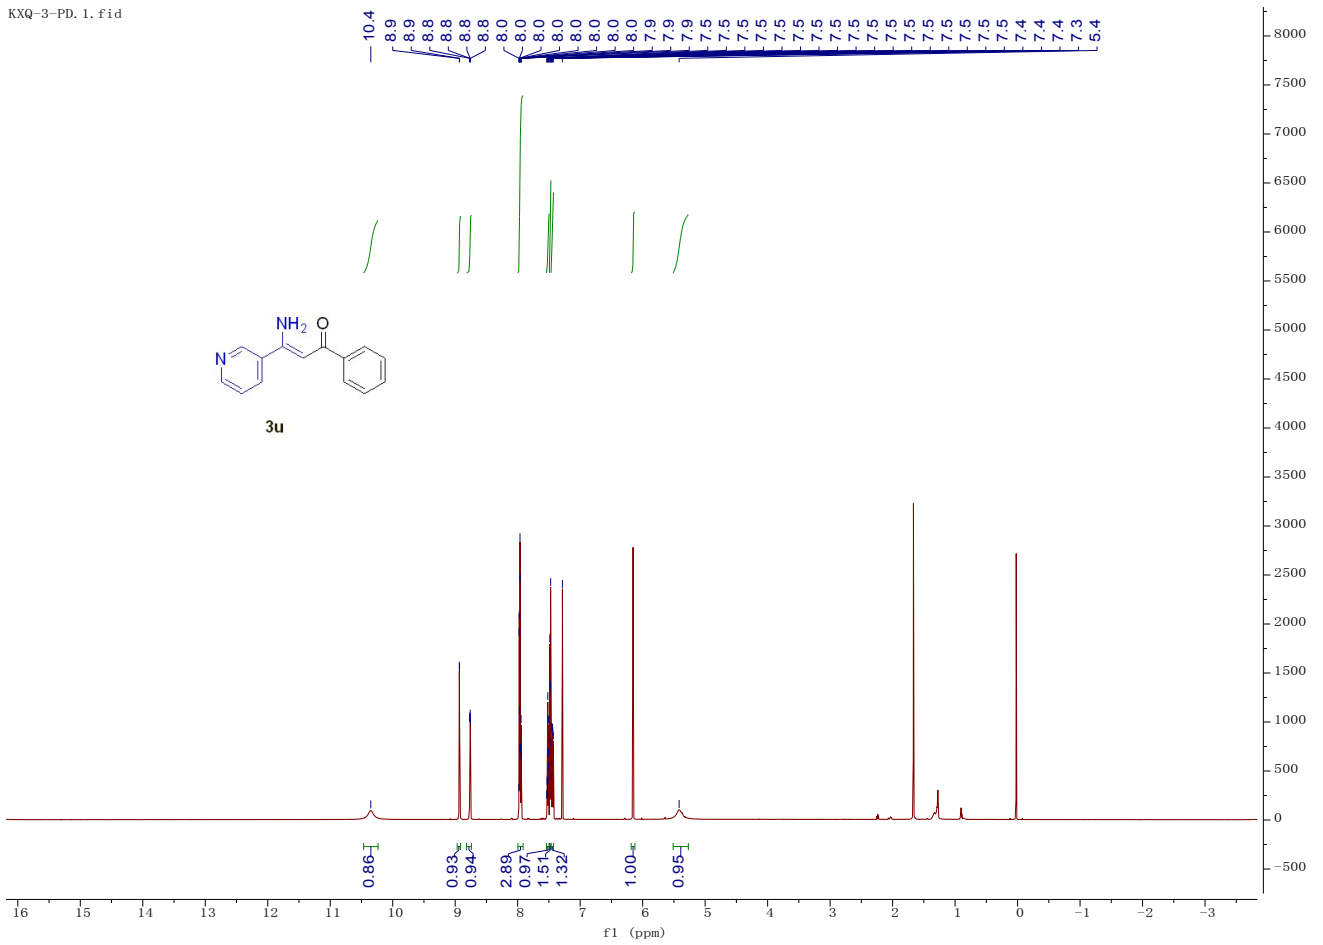

KXQ-3-PD, 2. fid

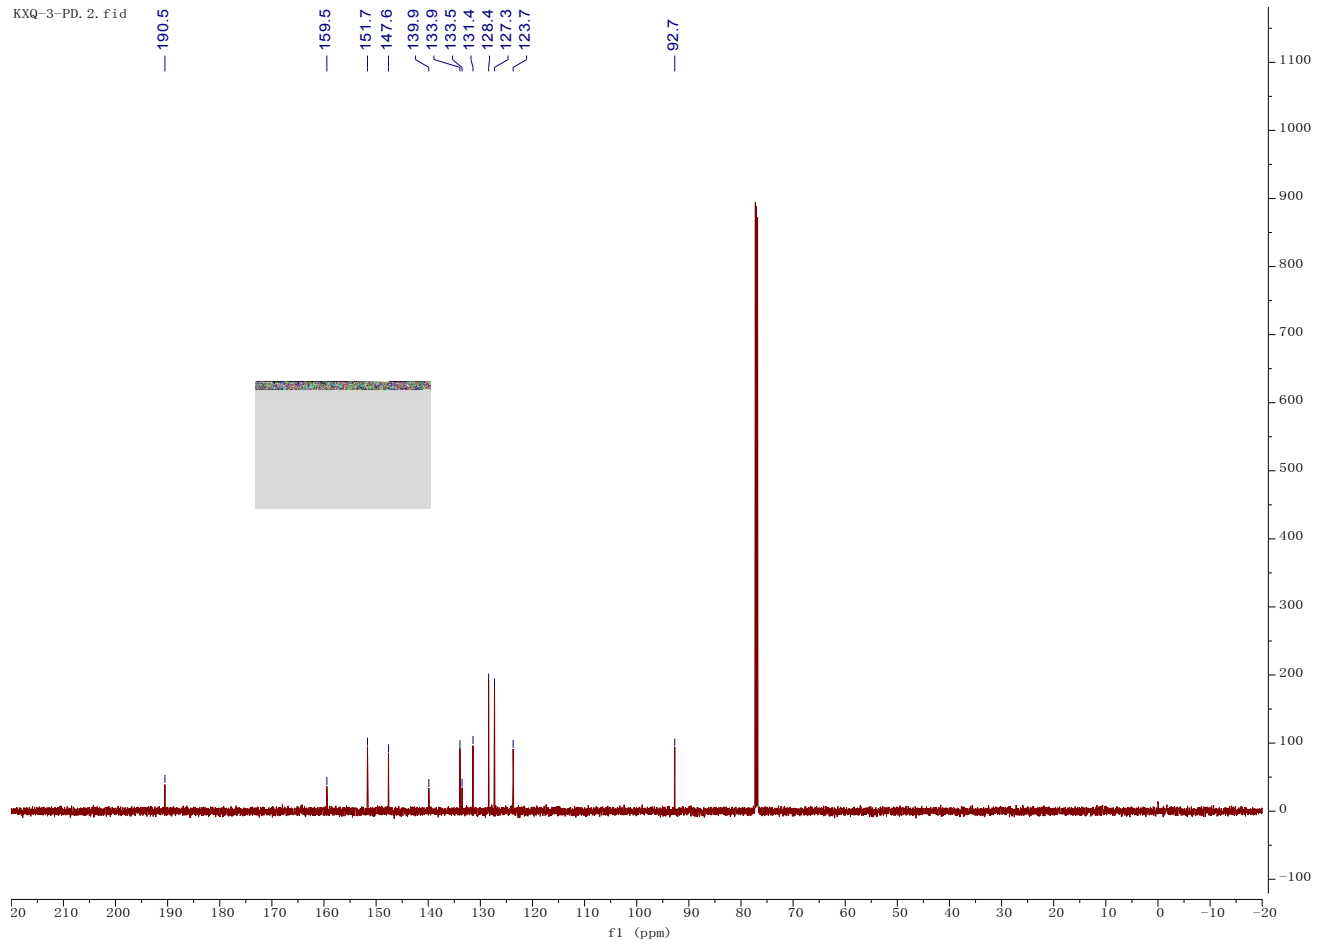



KXQ-NN-1.1.fid

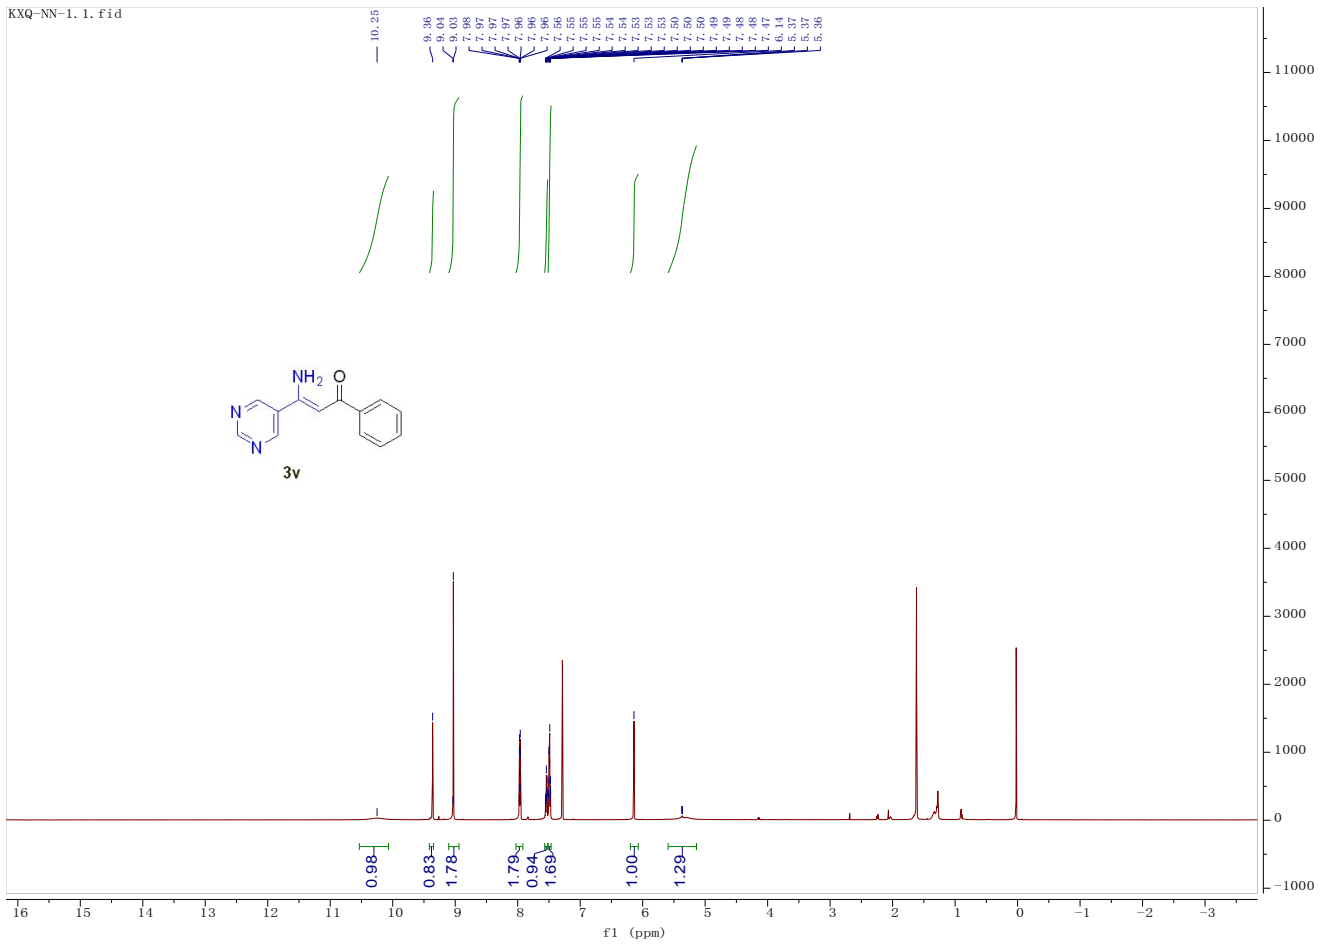

KXQ-NN-1-C.1.fid

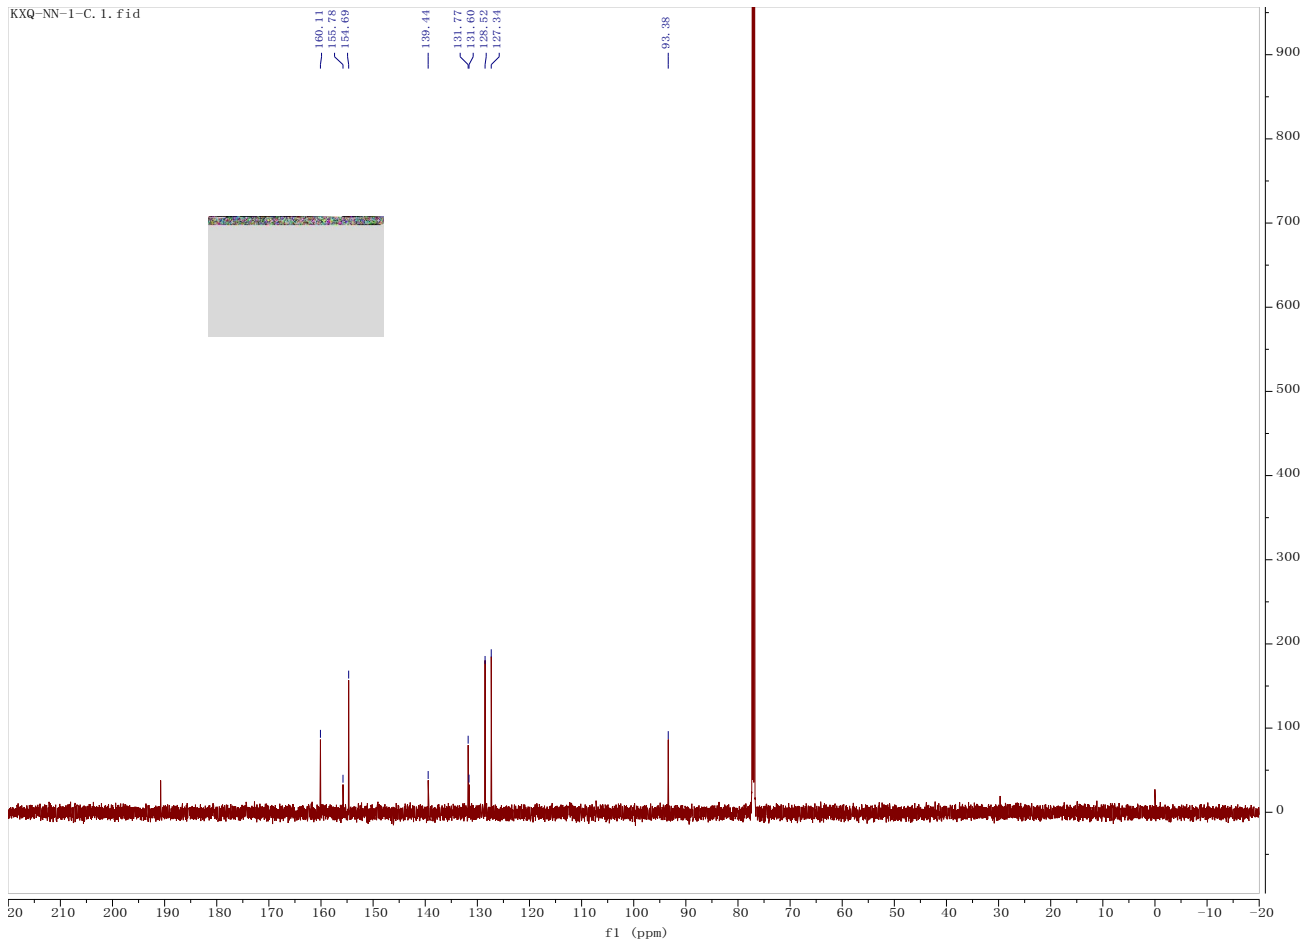



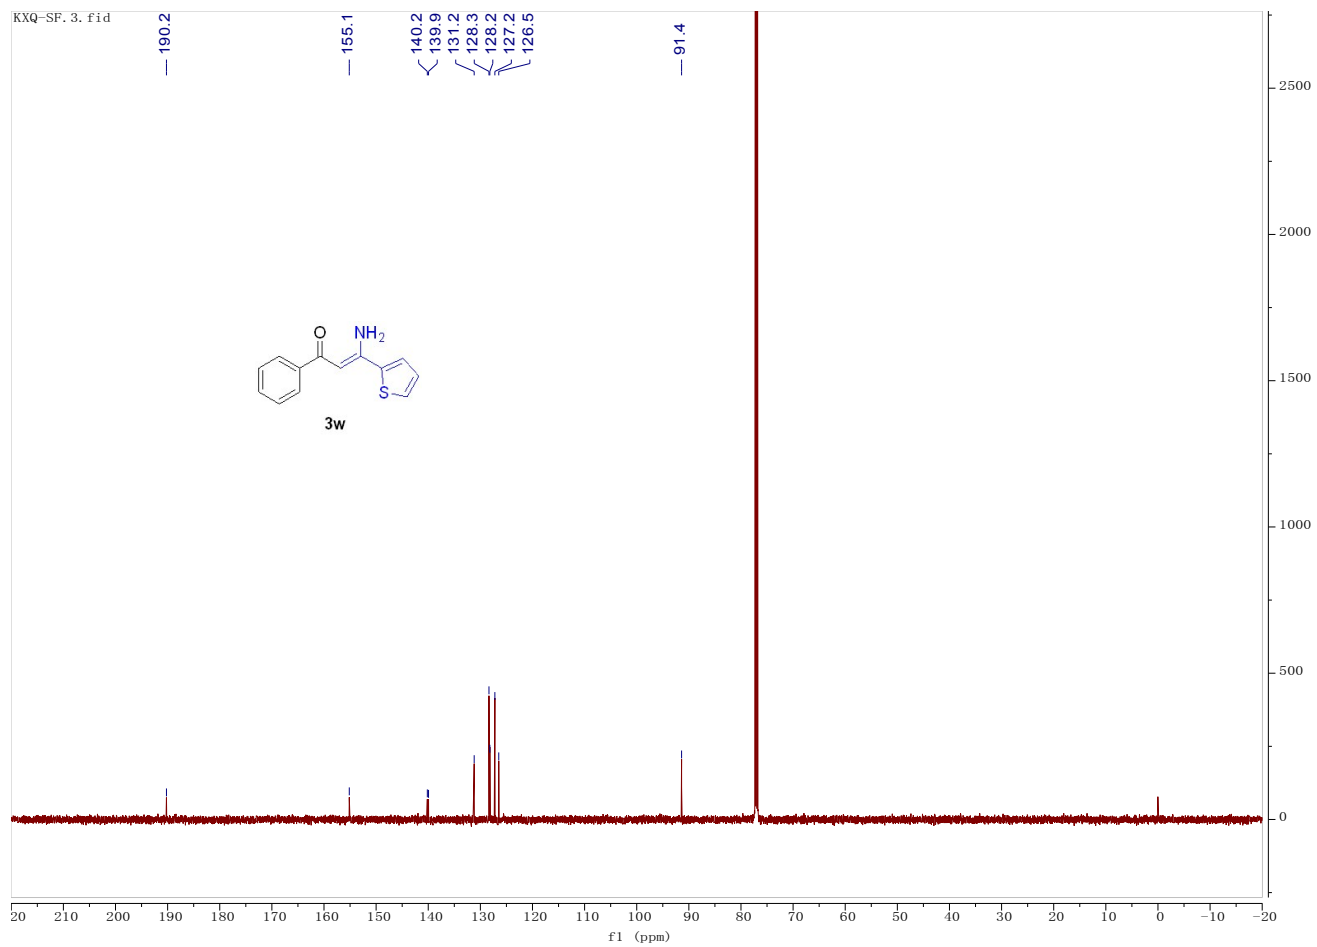

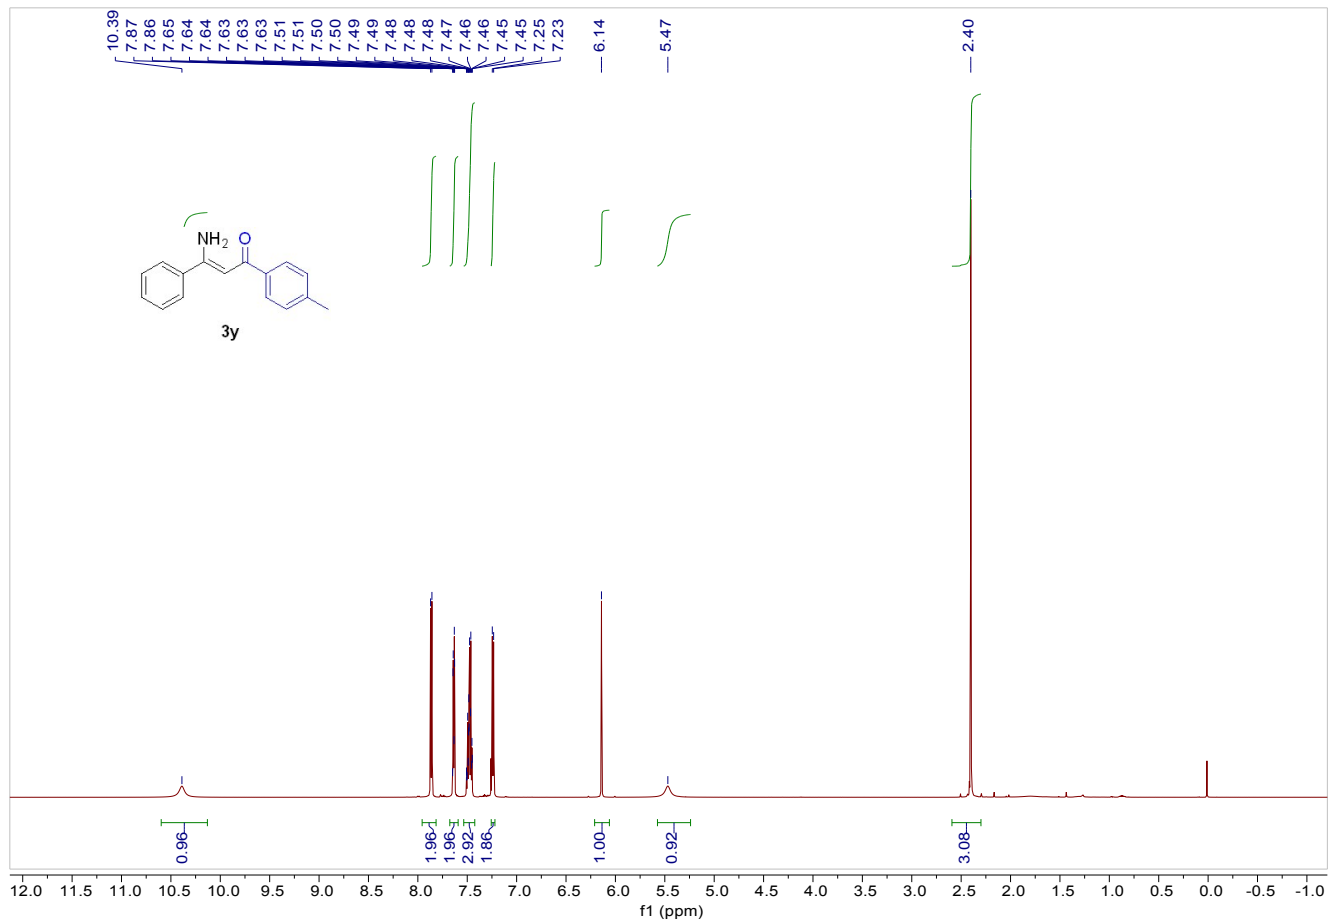

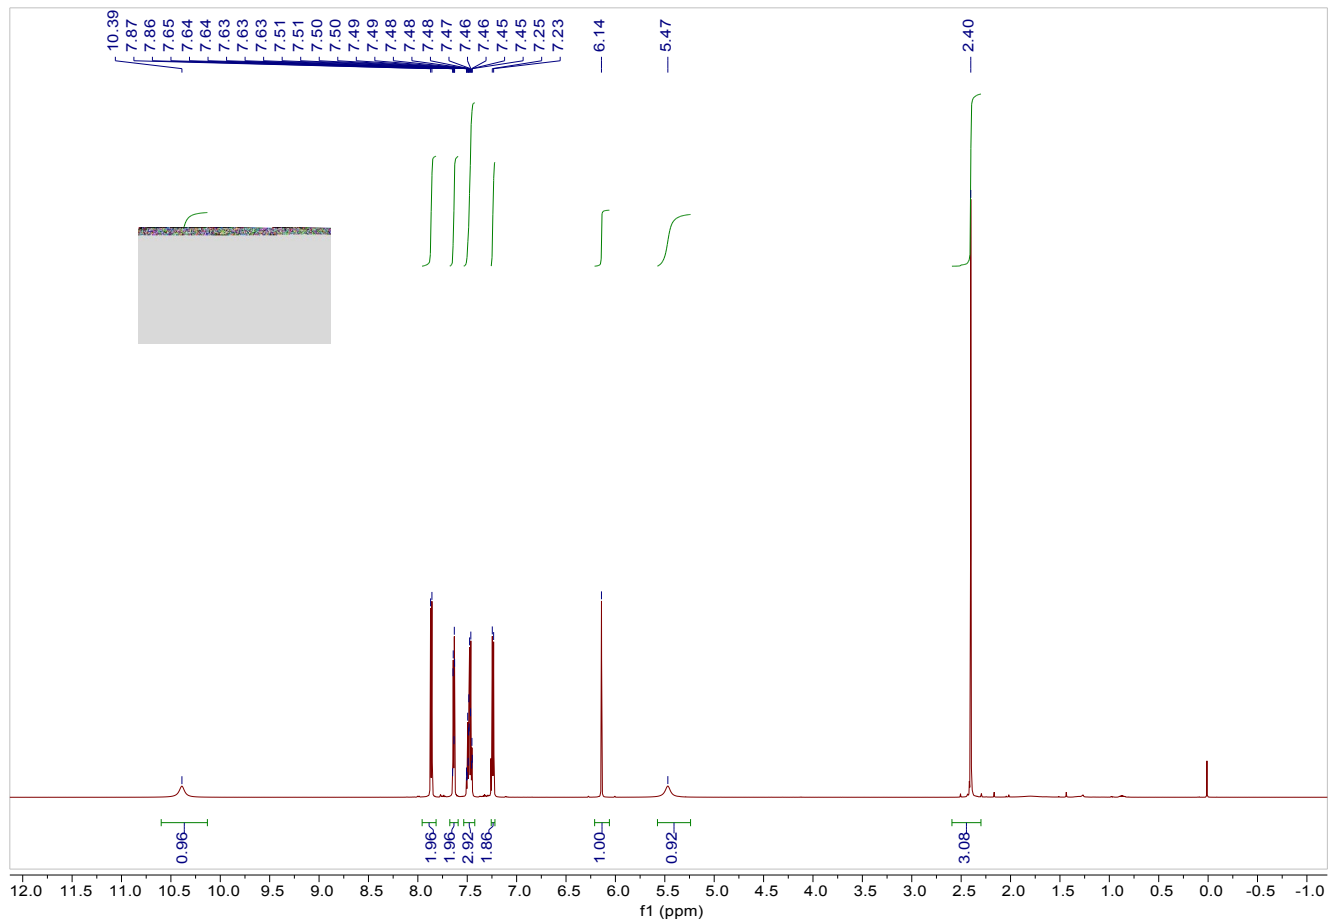

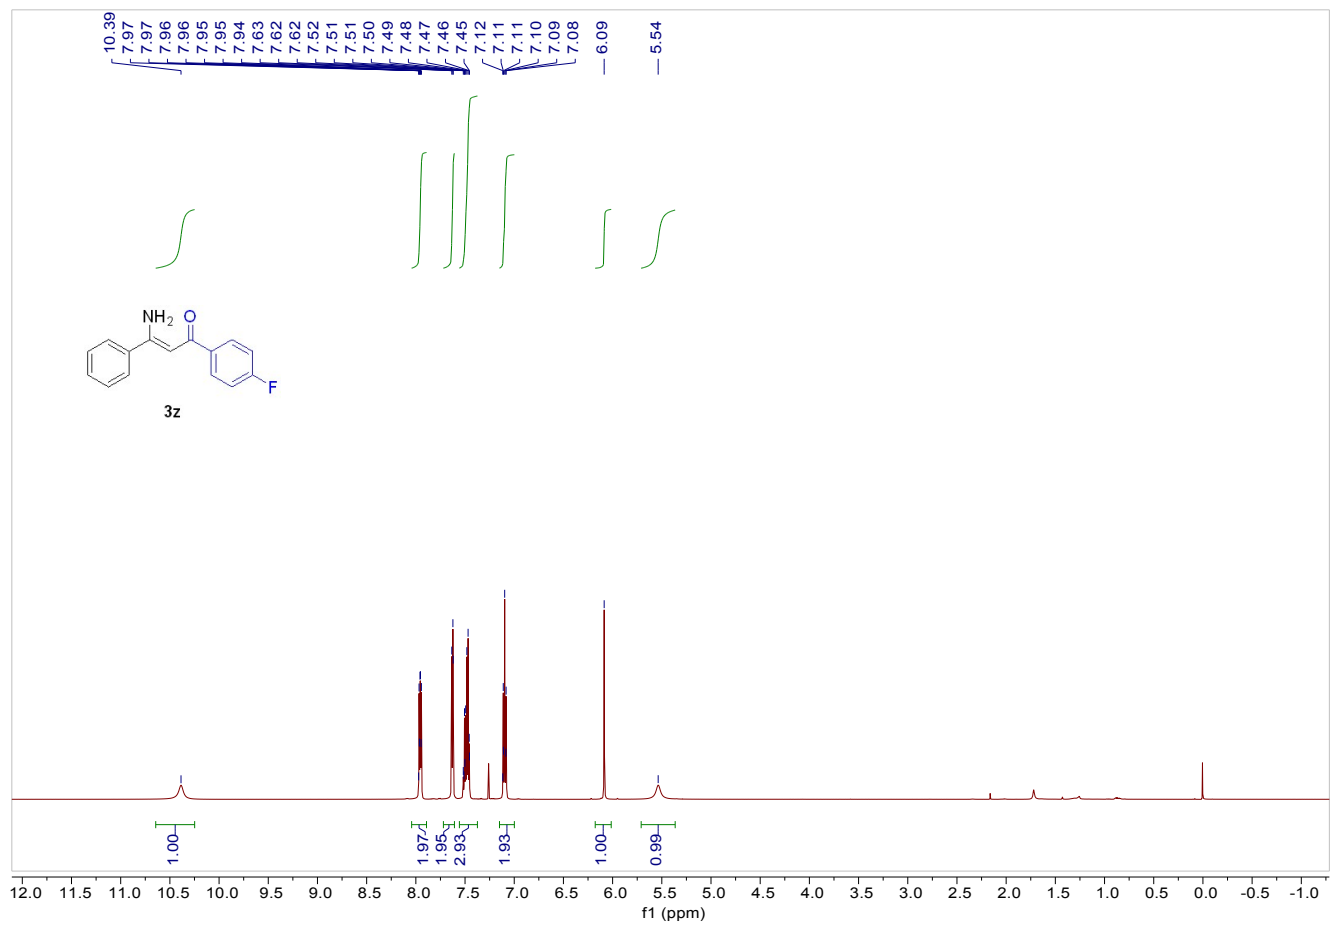

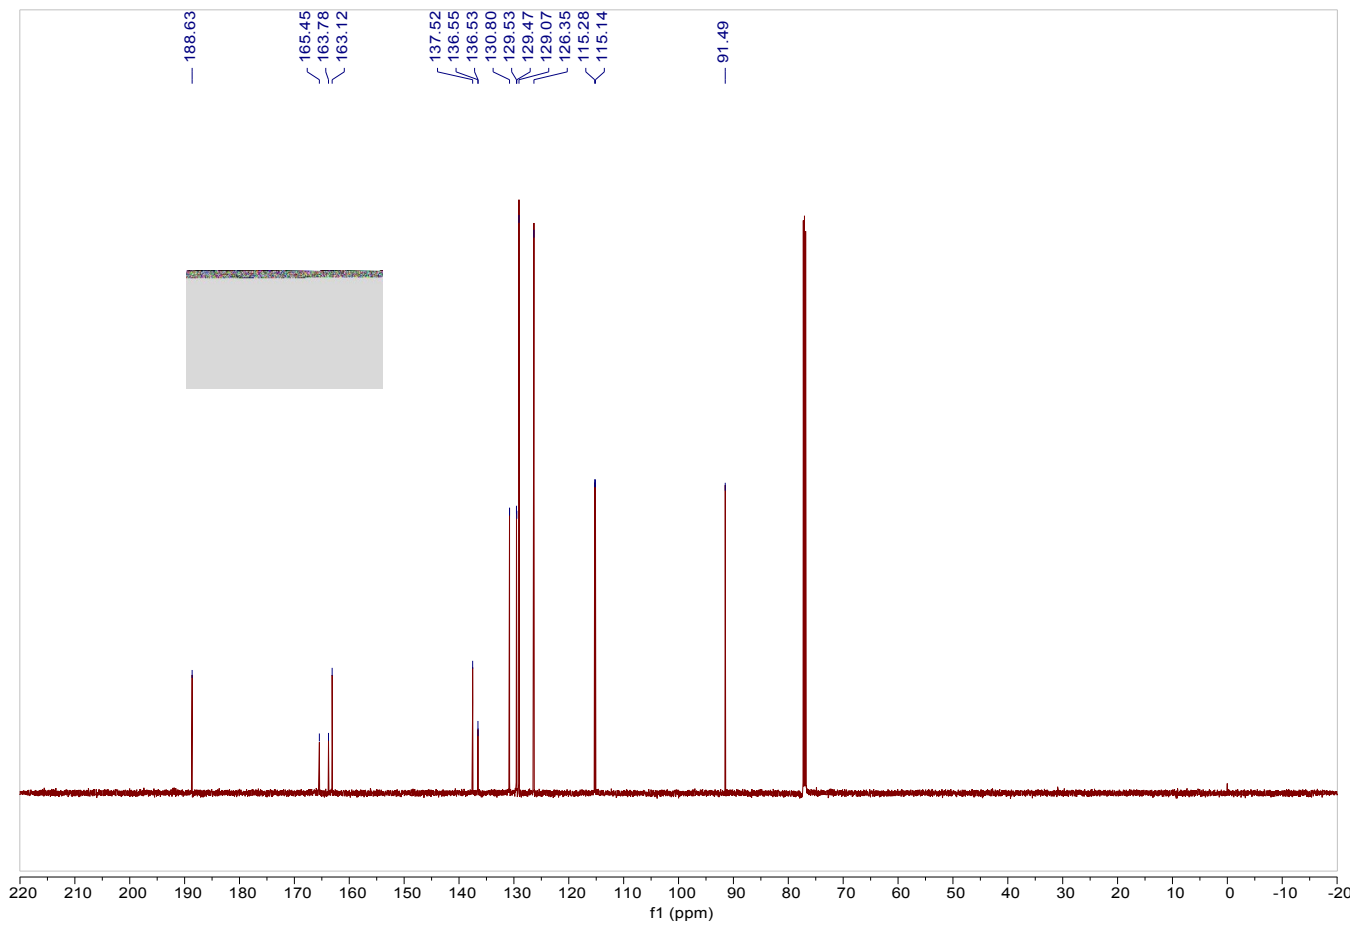



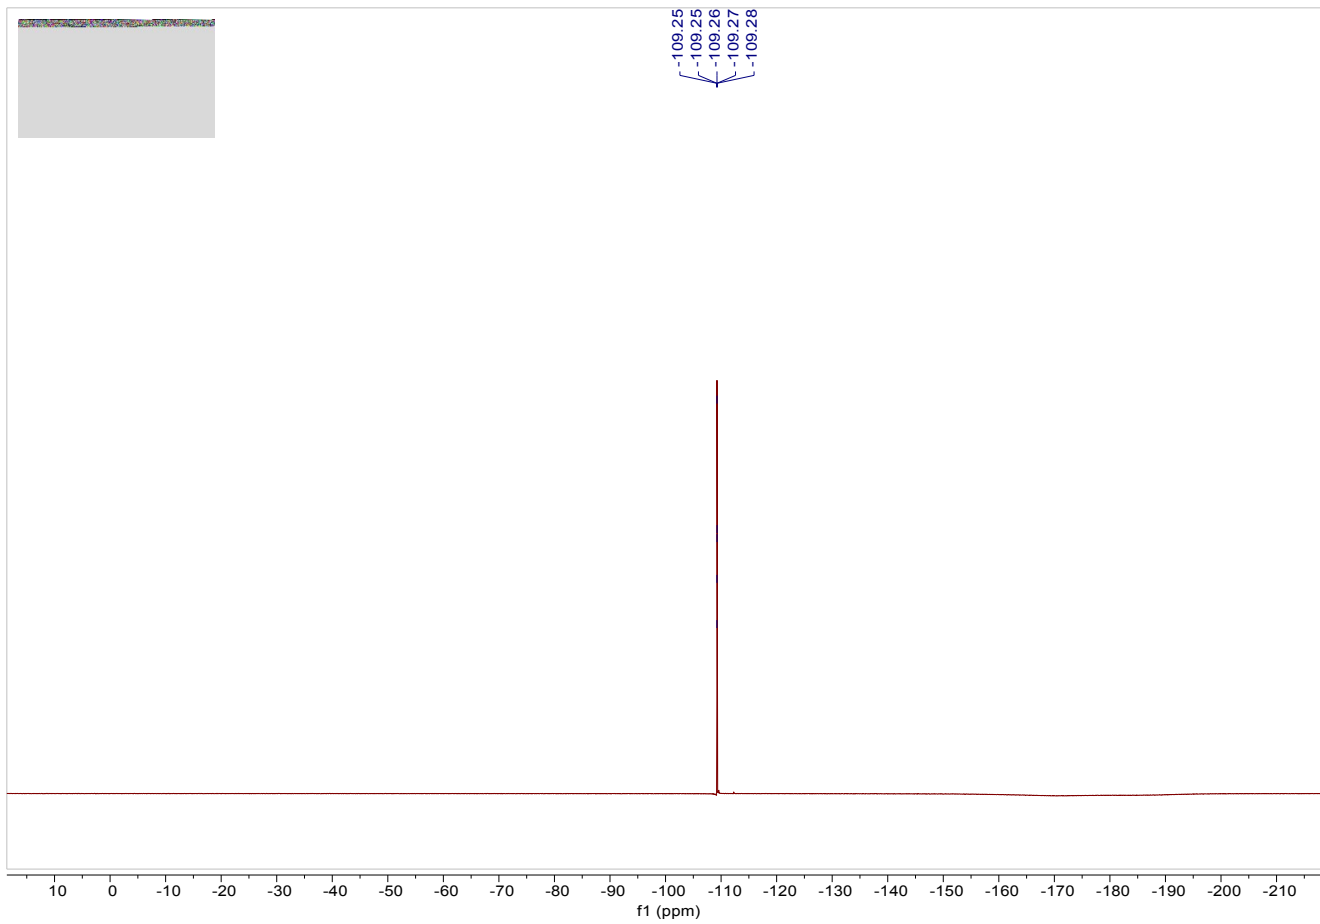

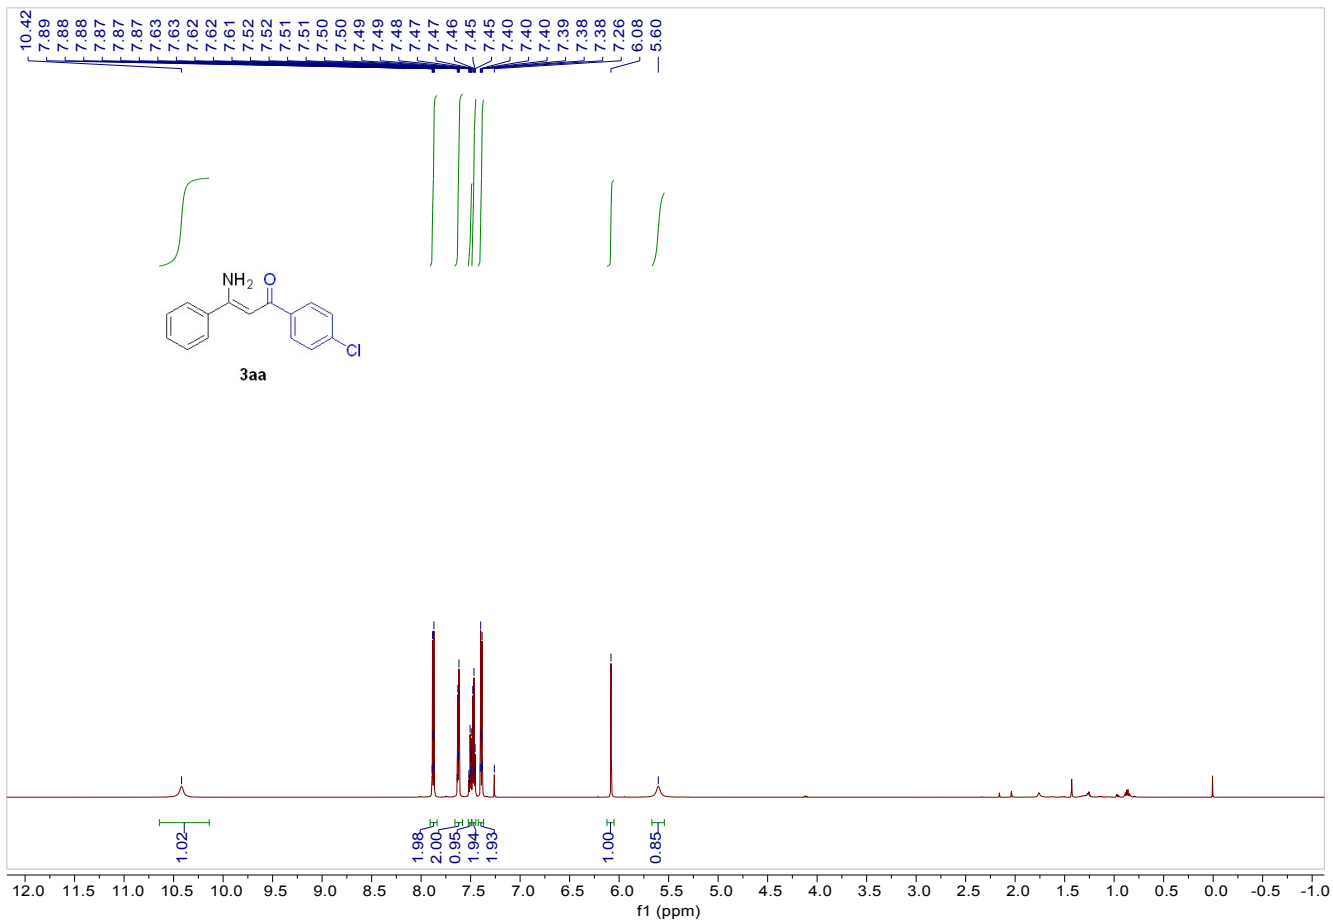

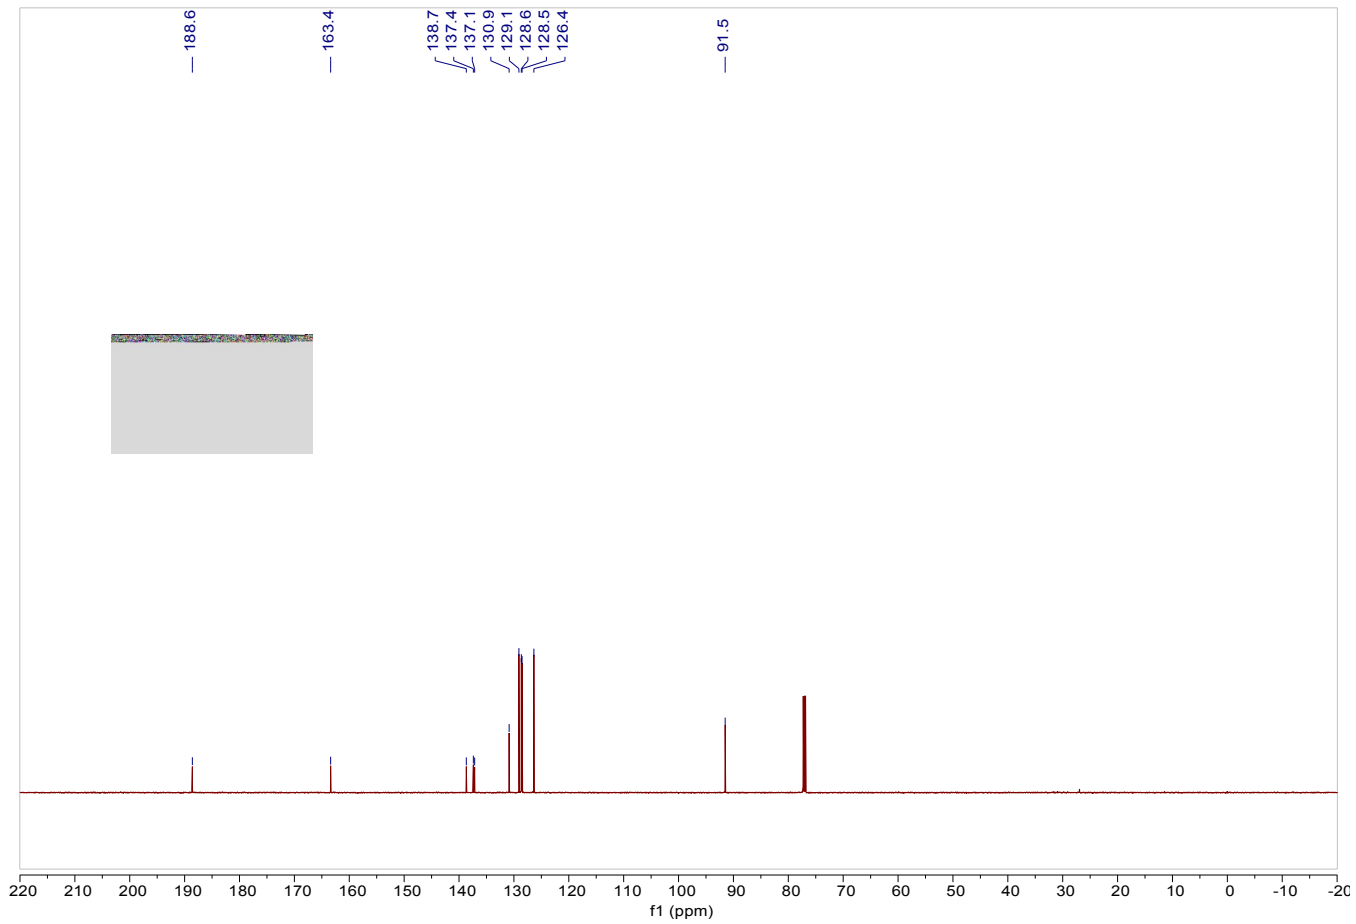

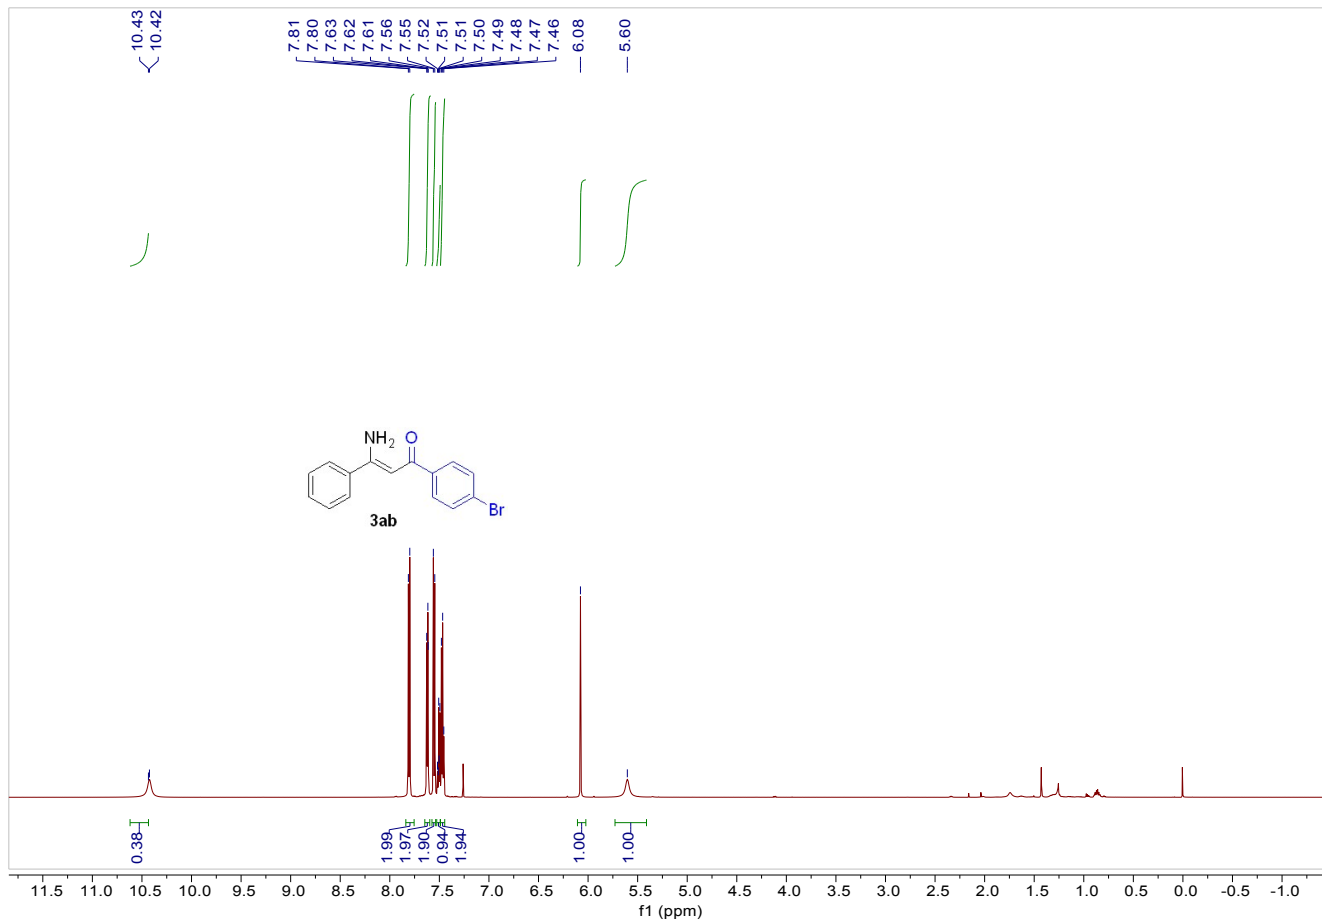

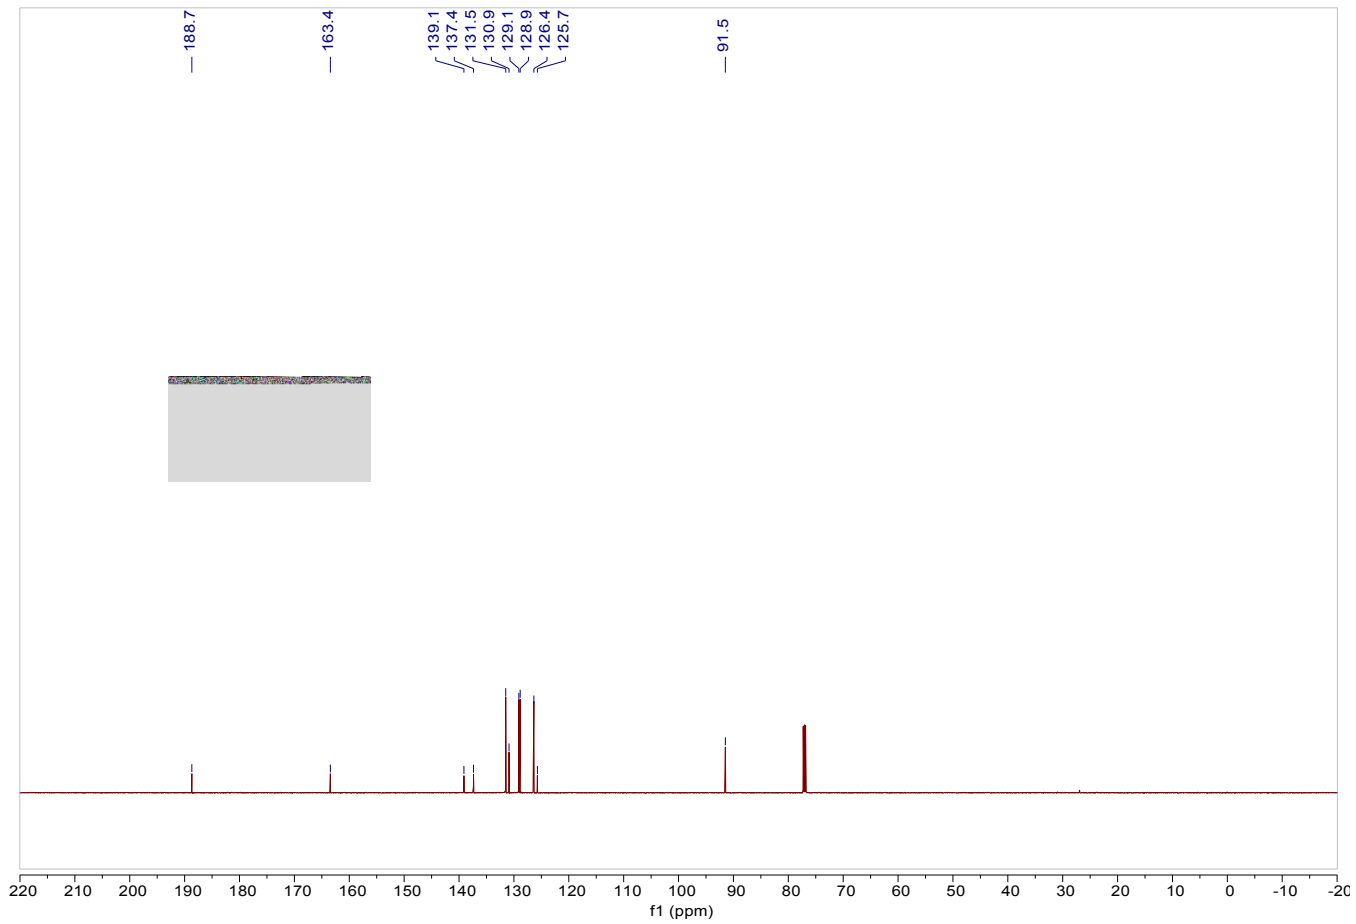

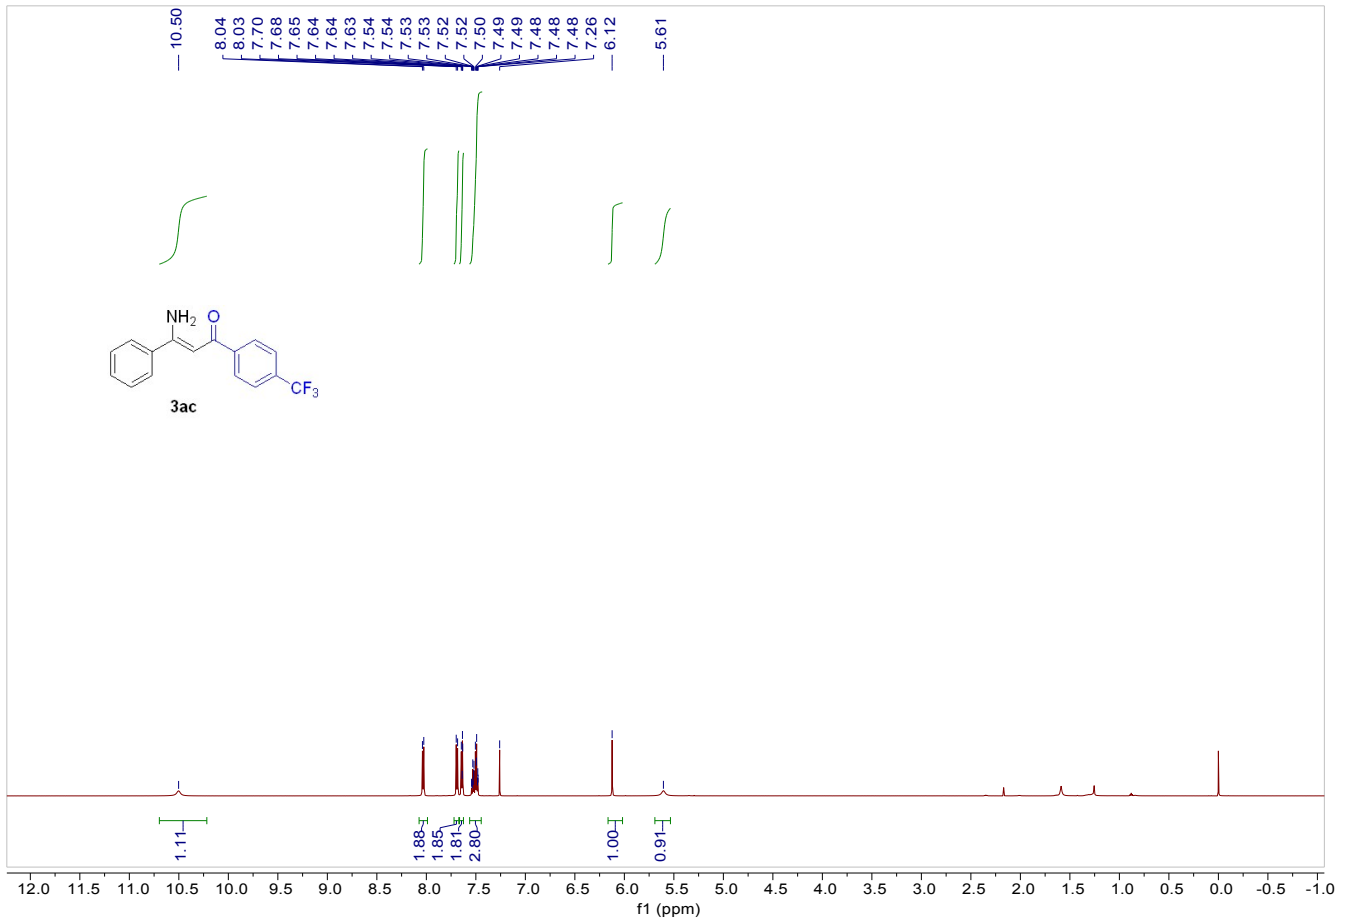

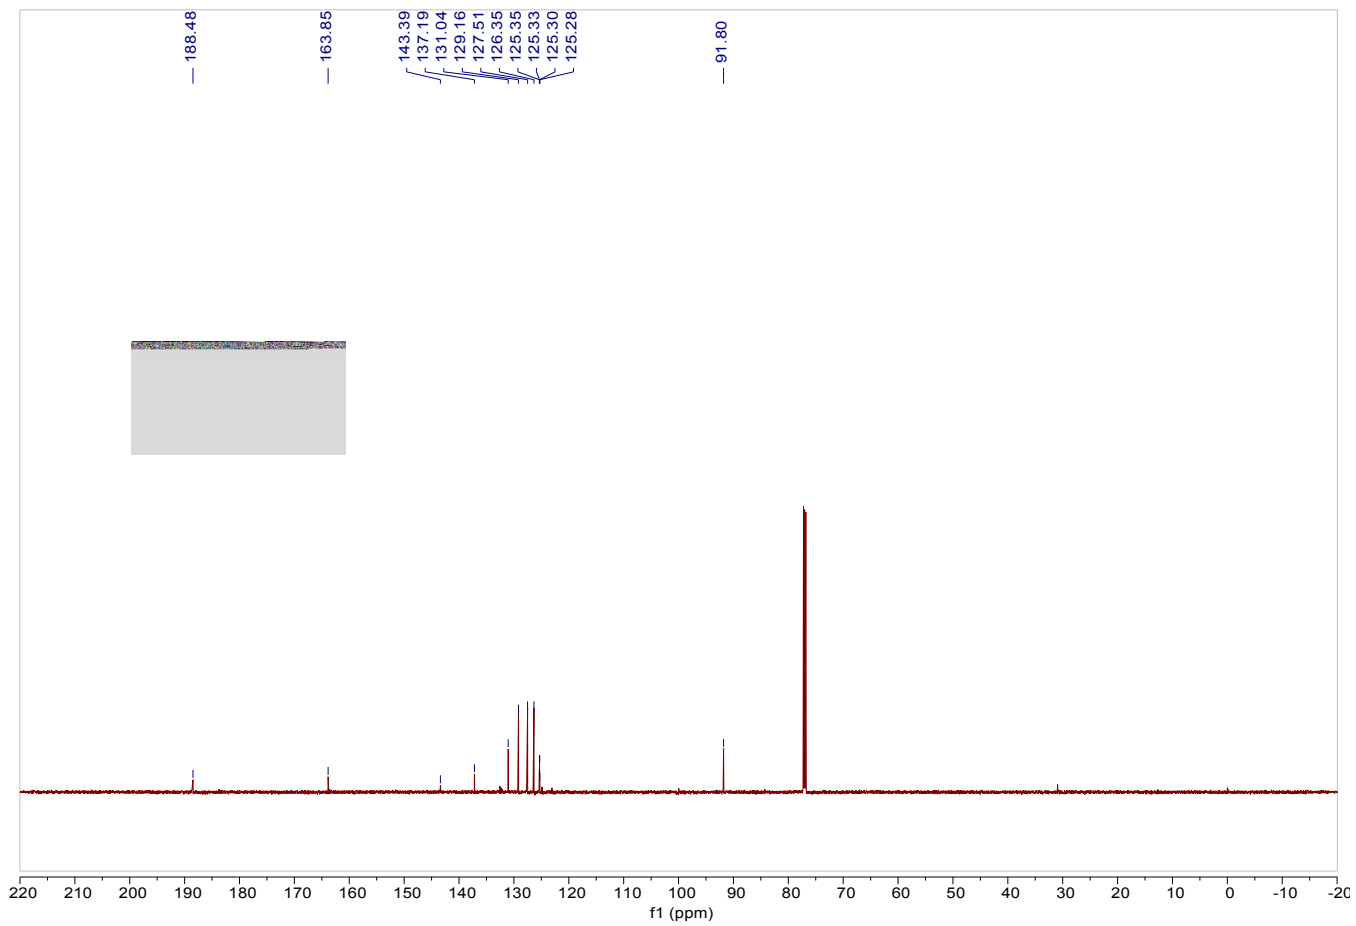

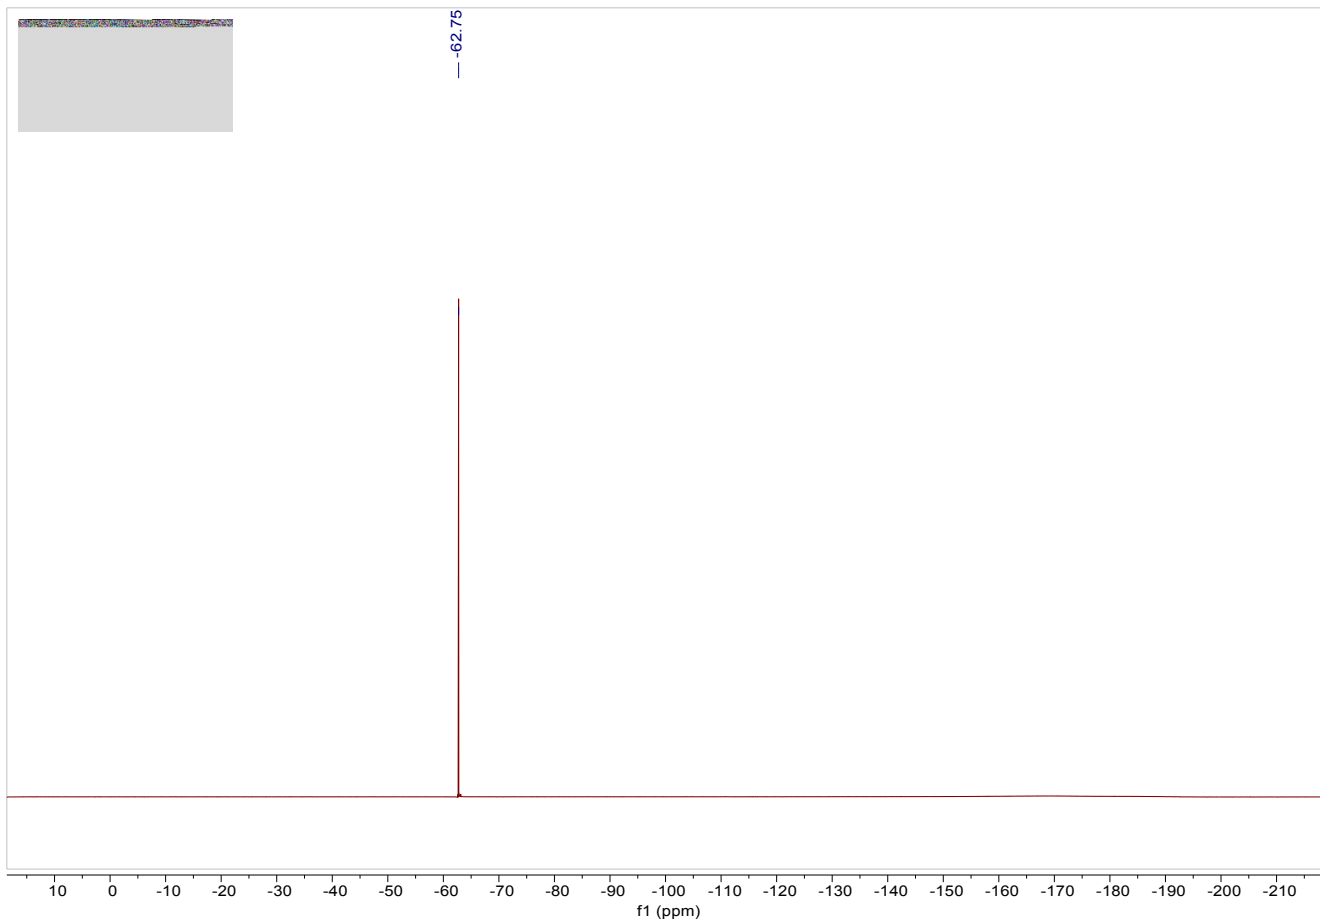



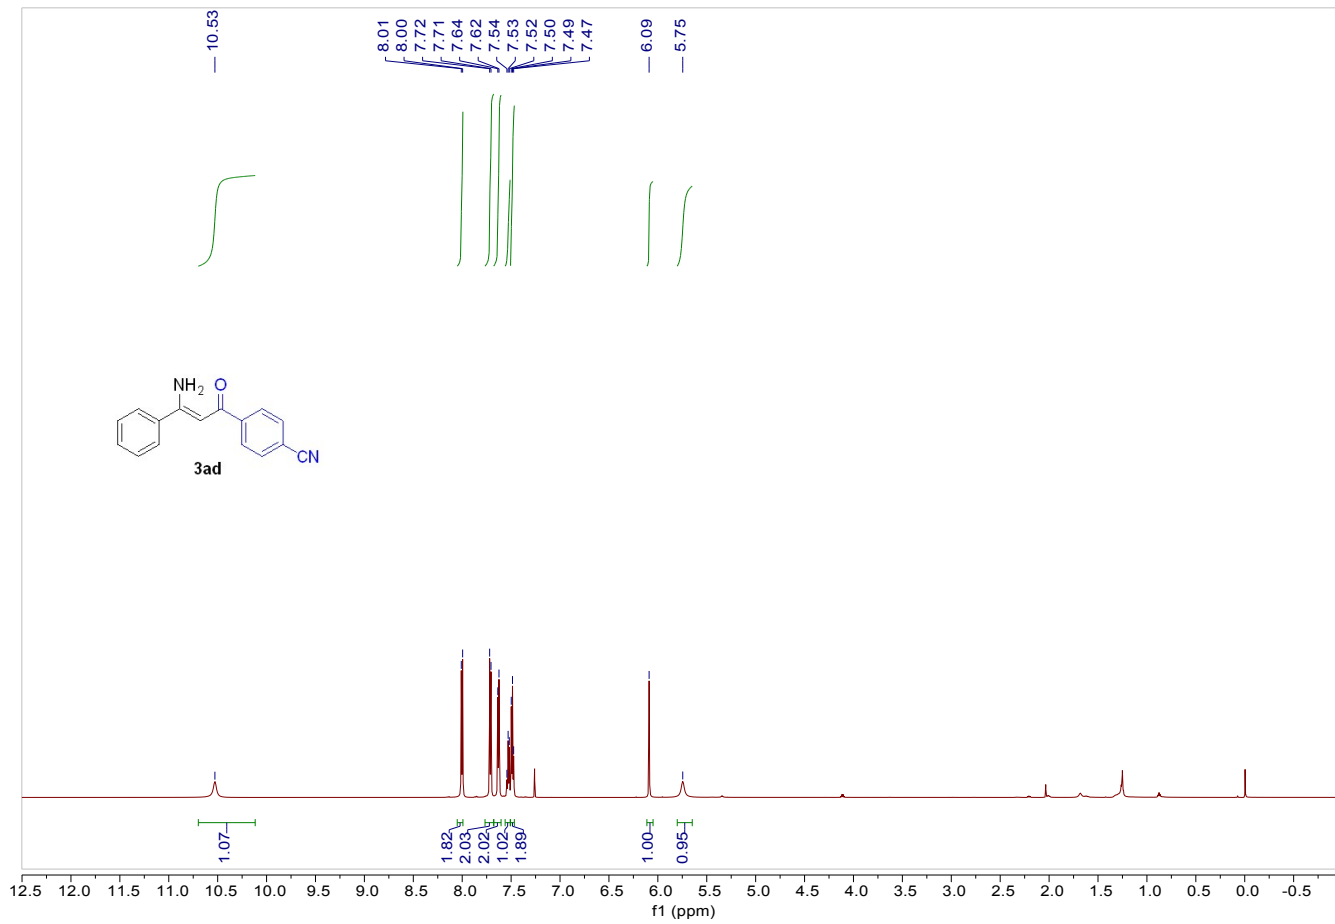

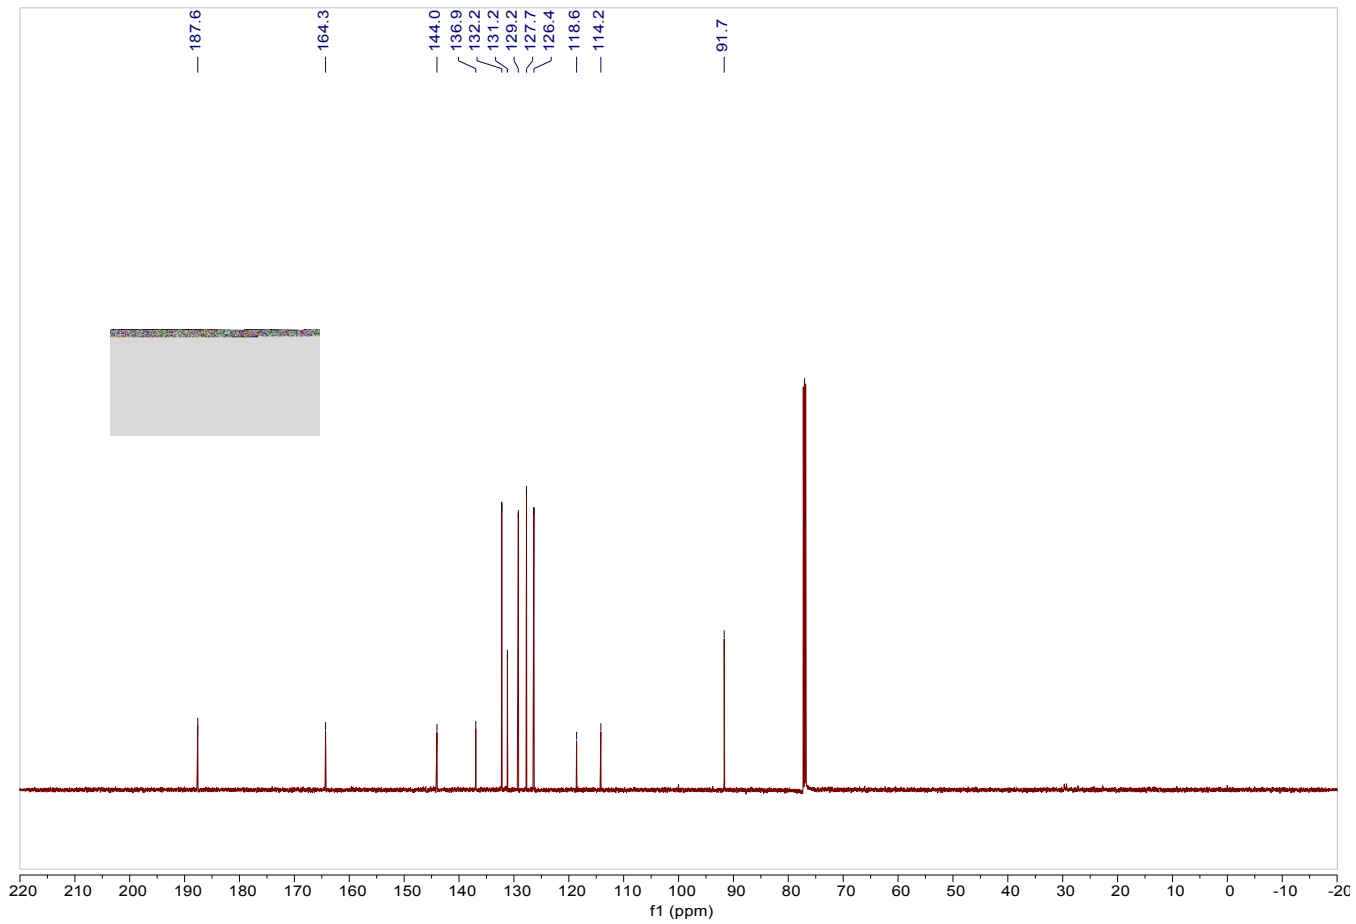

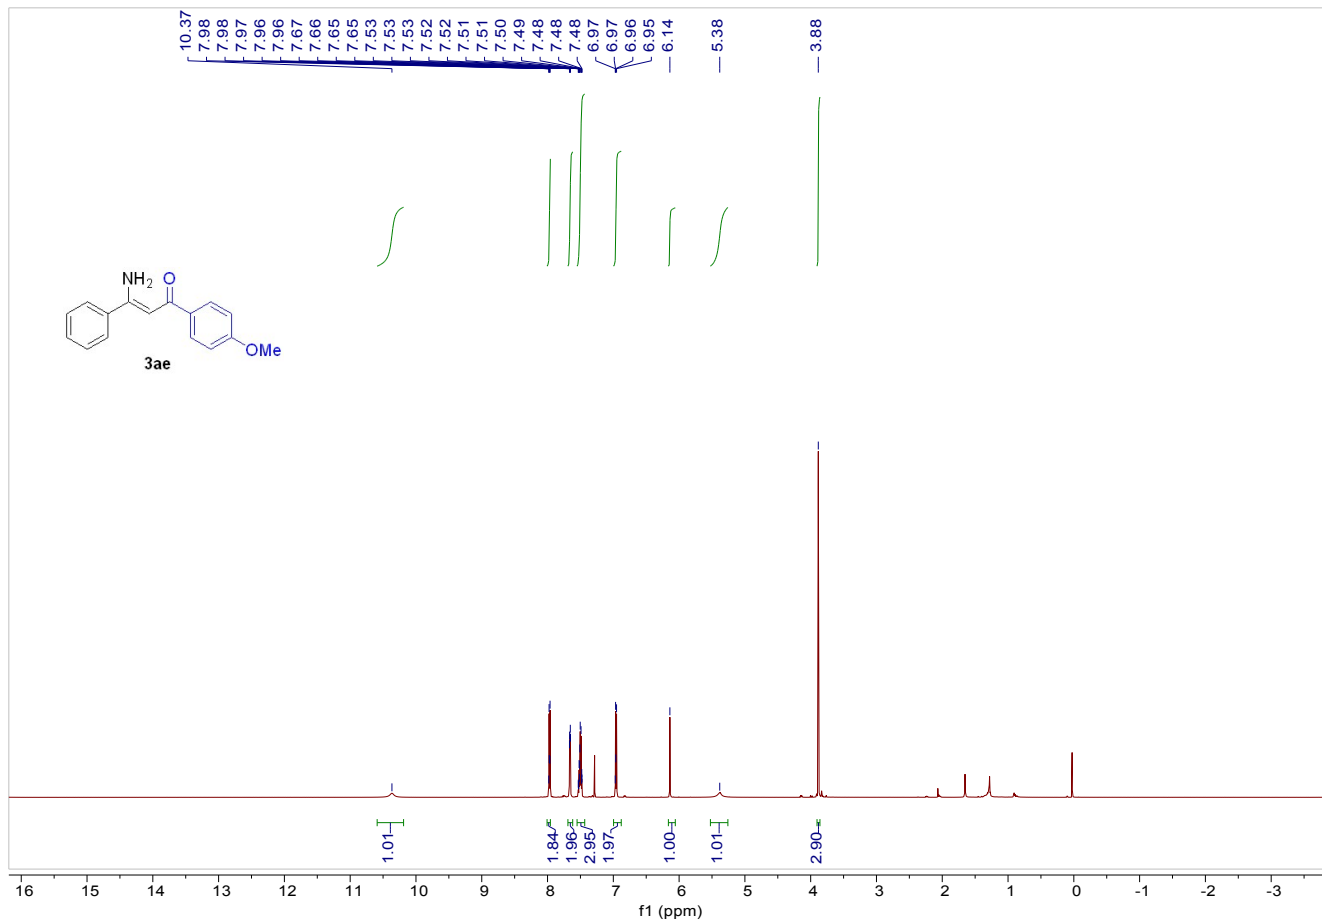

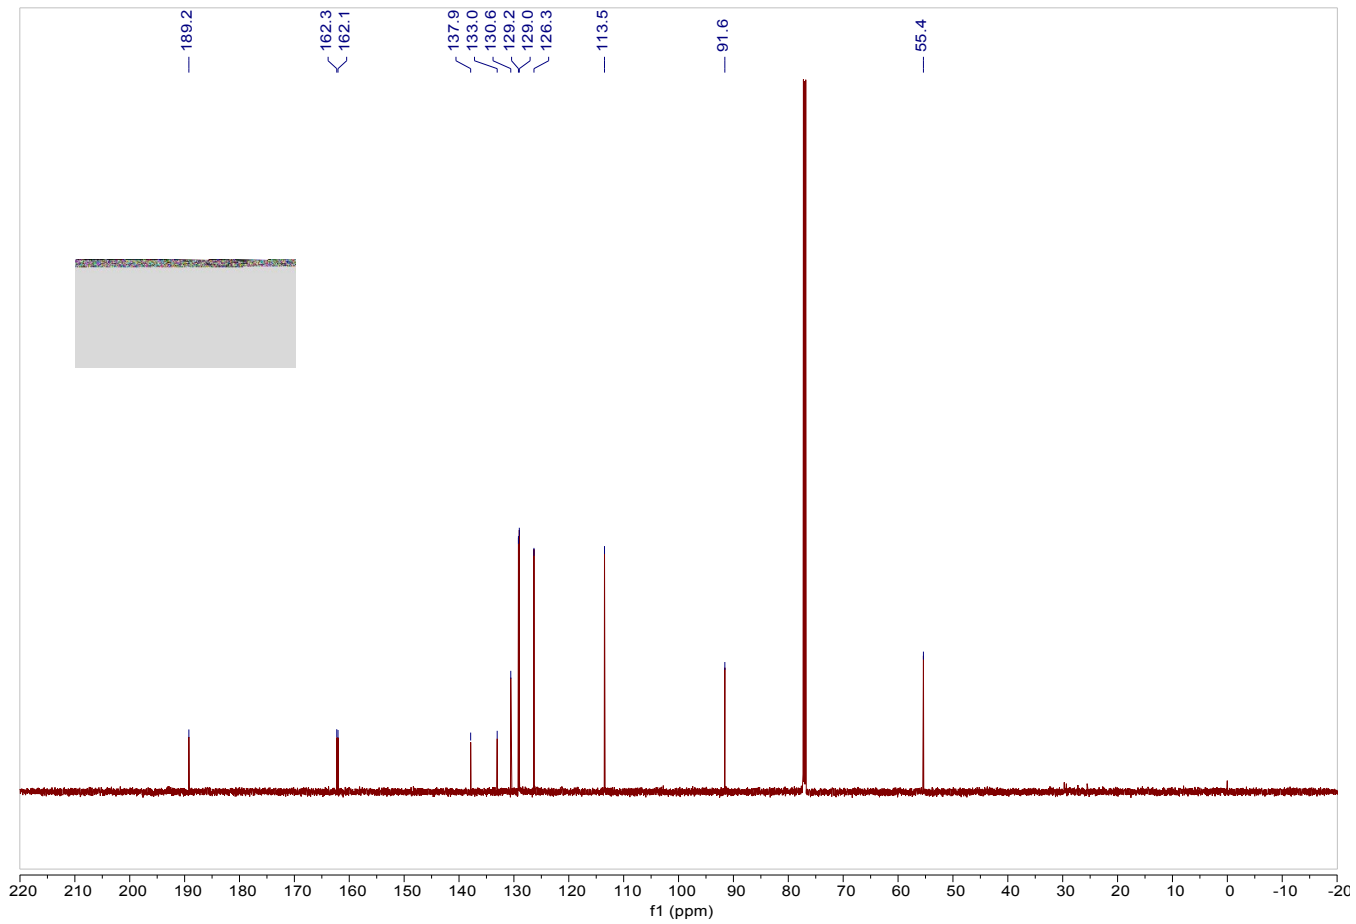

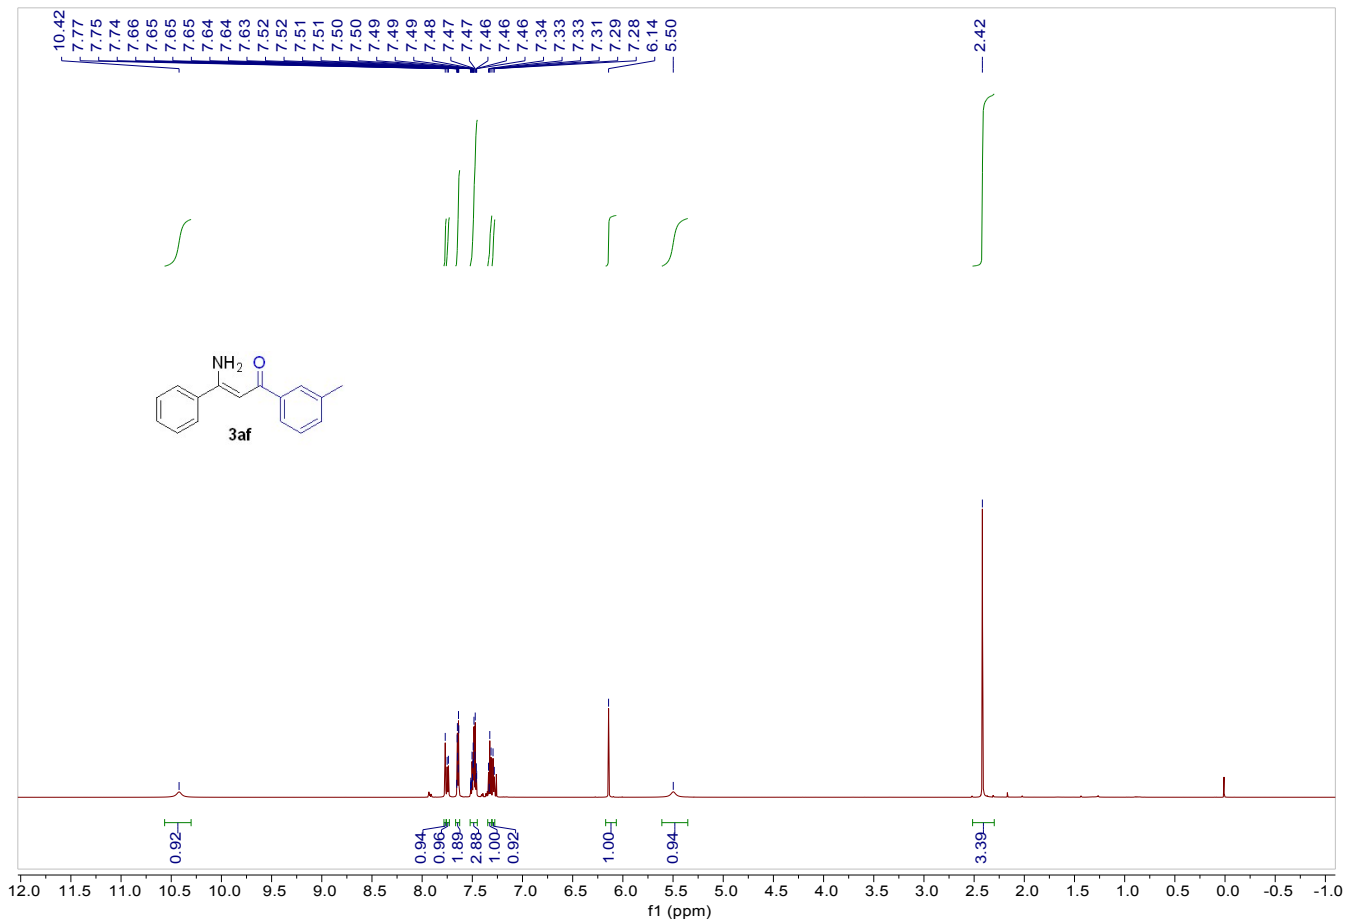

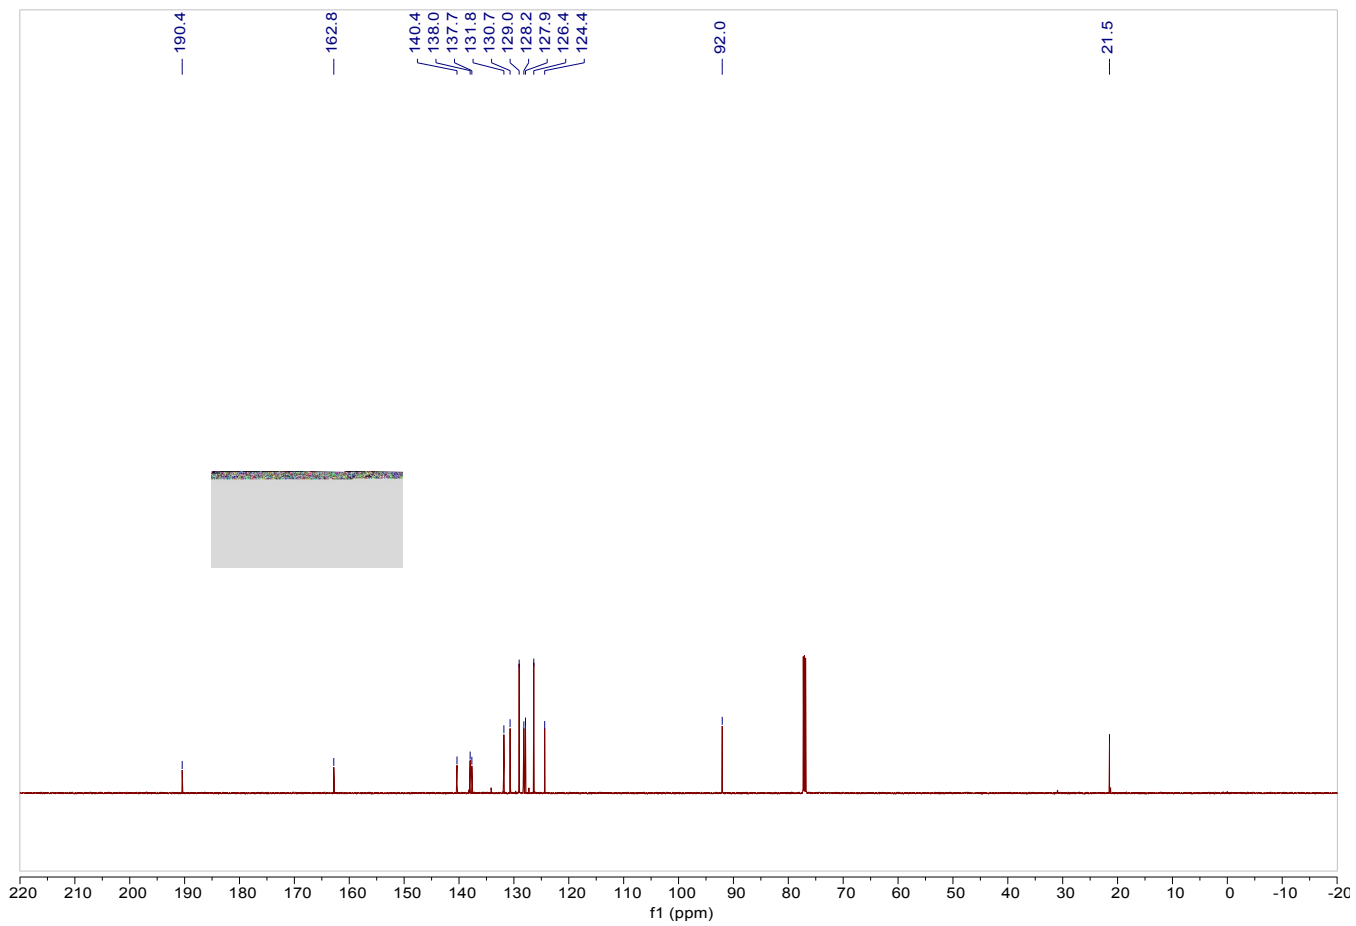

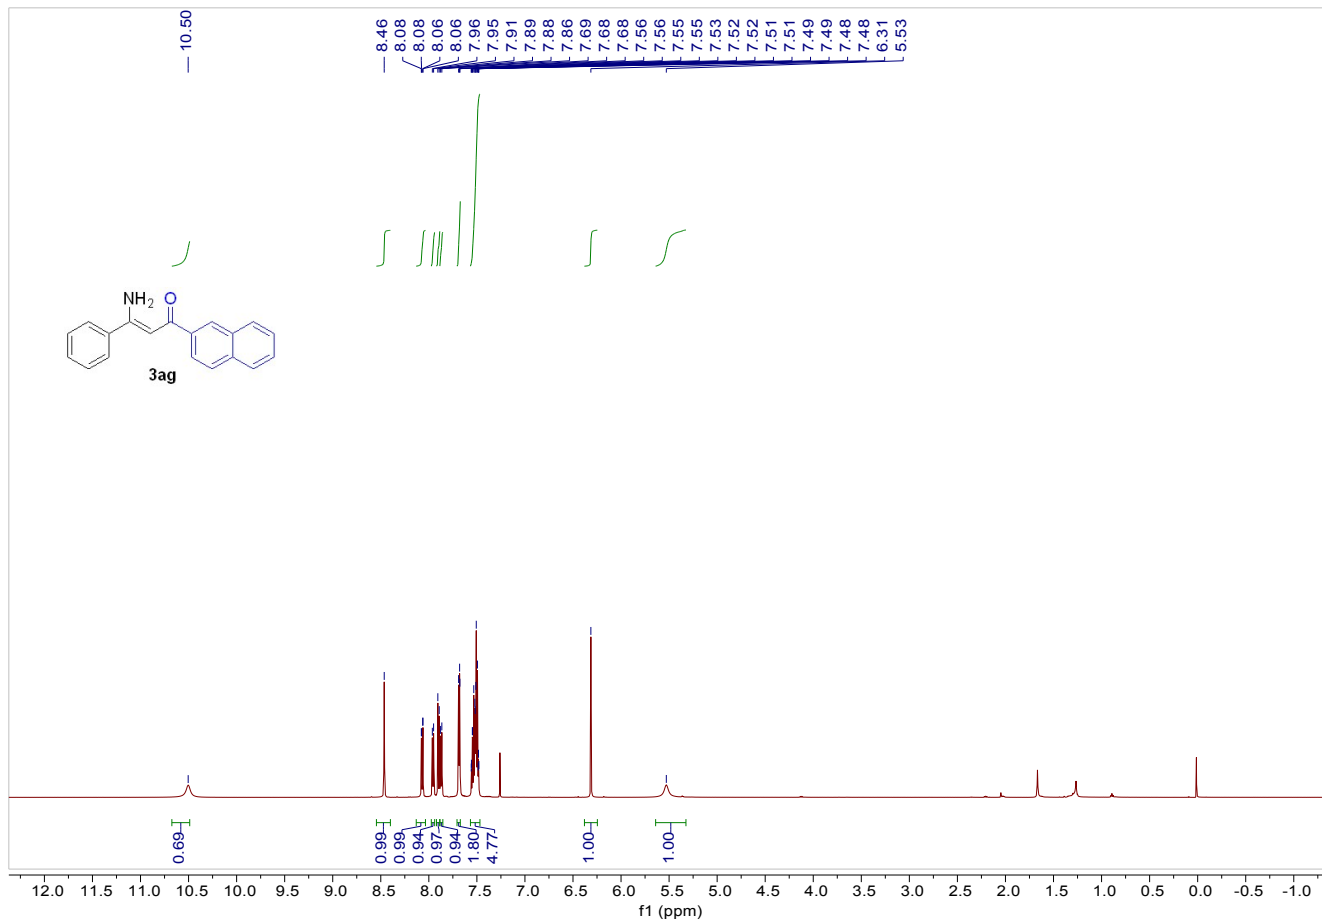

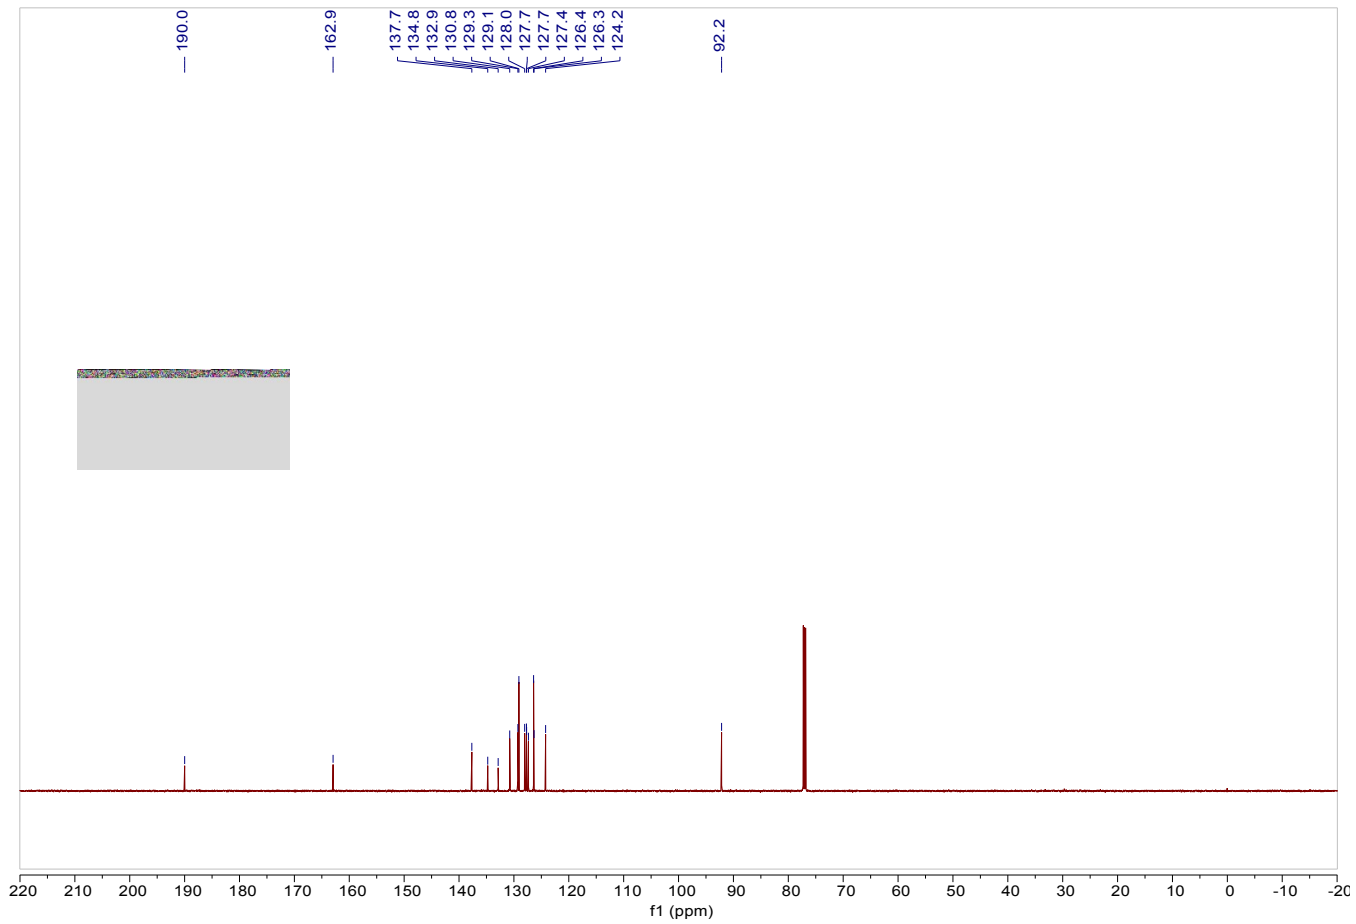



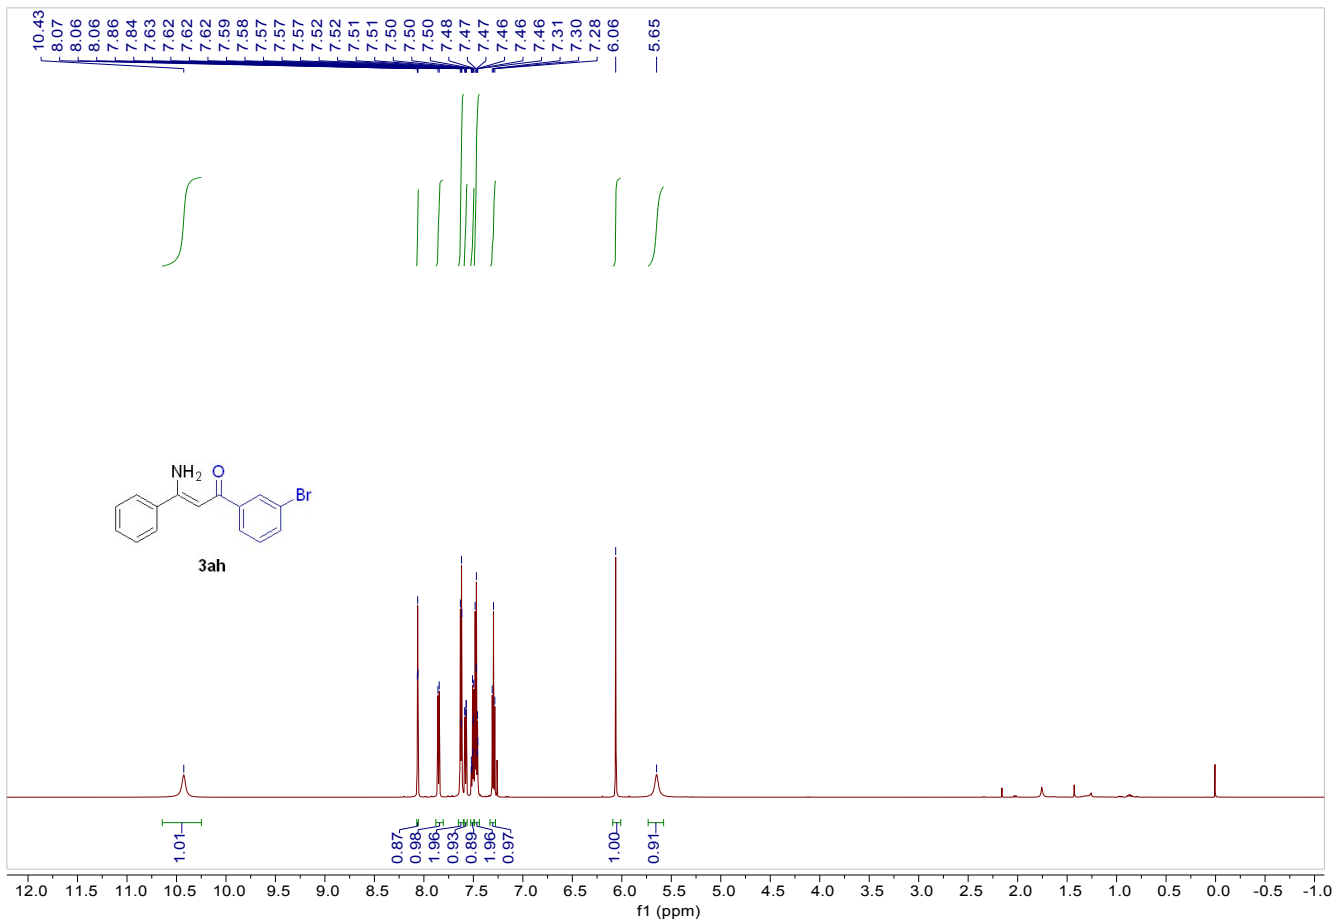

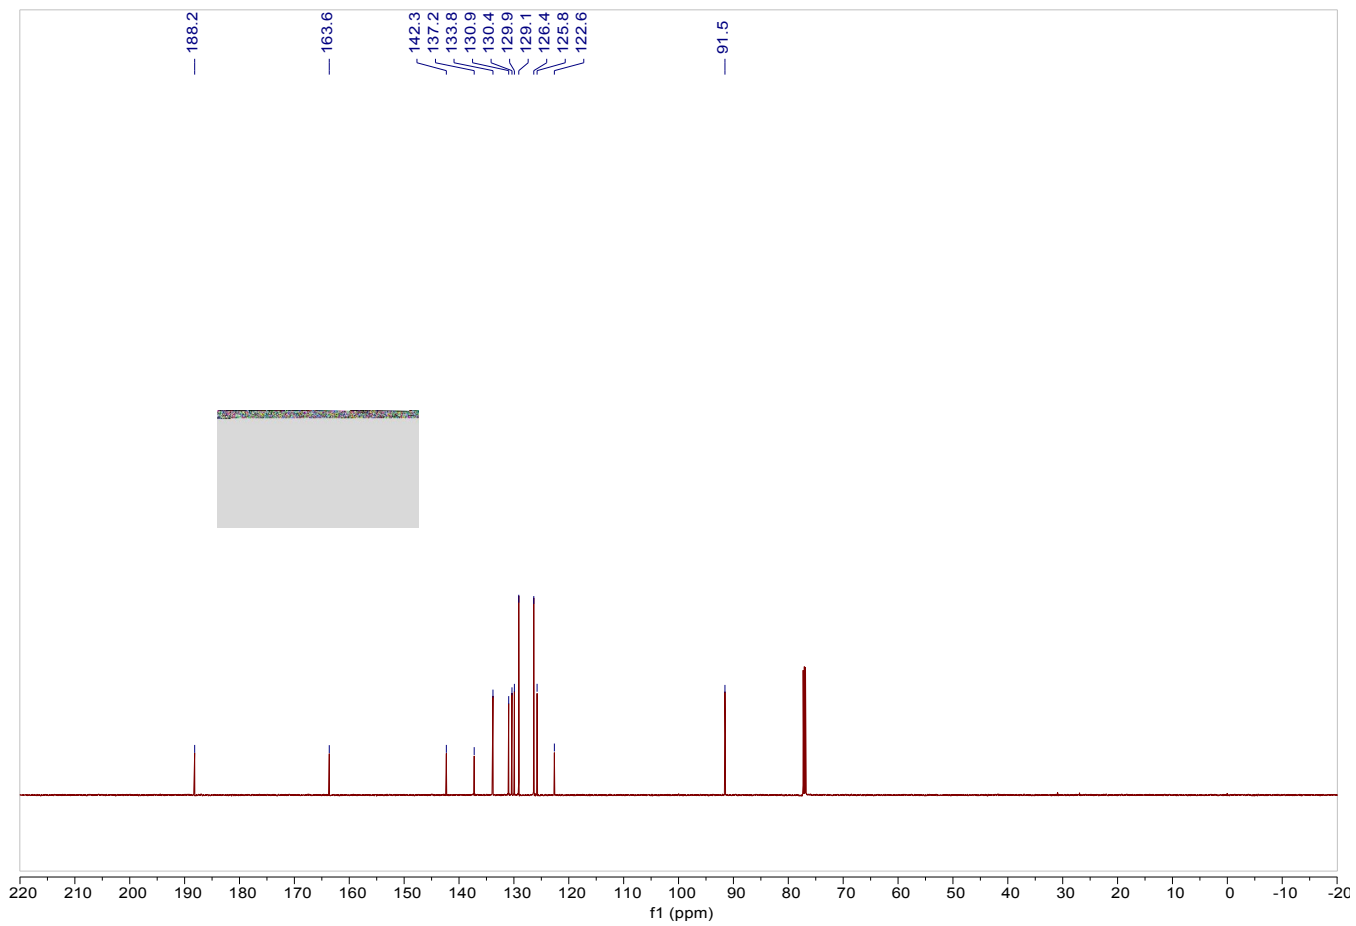

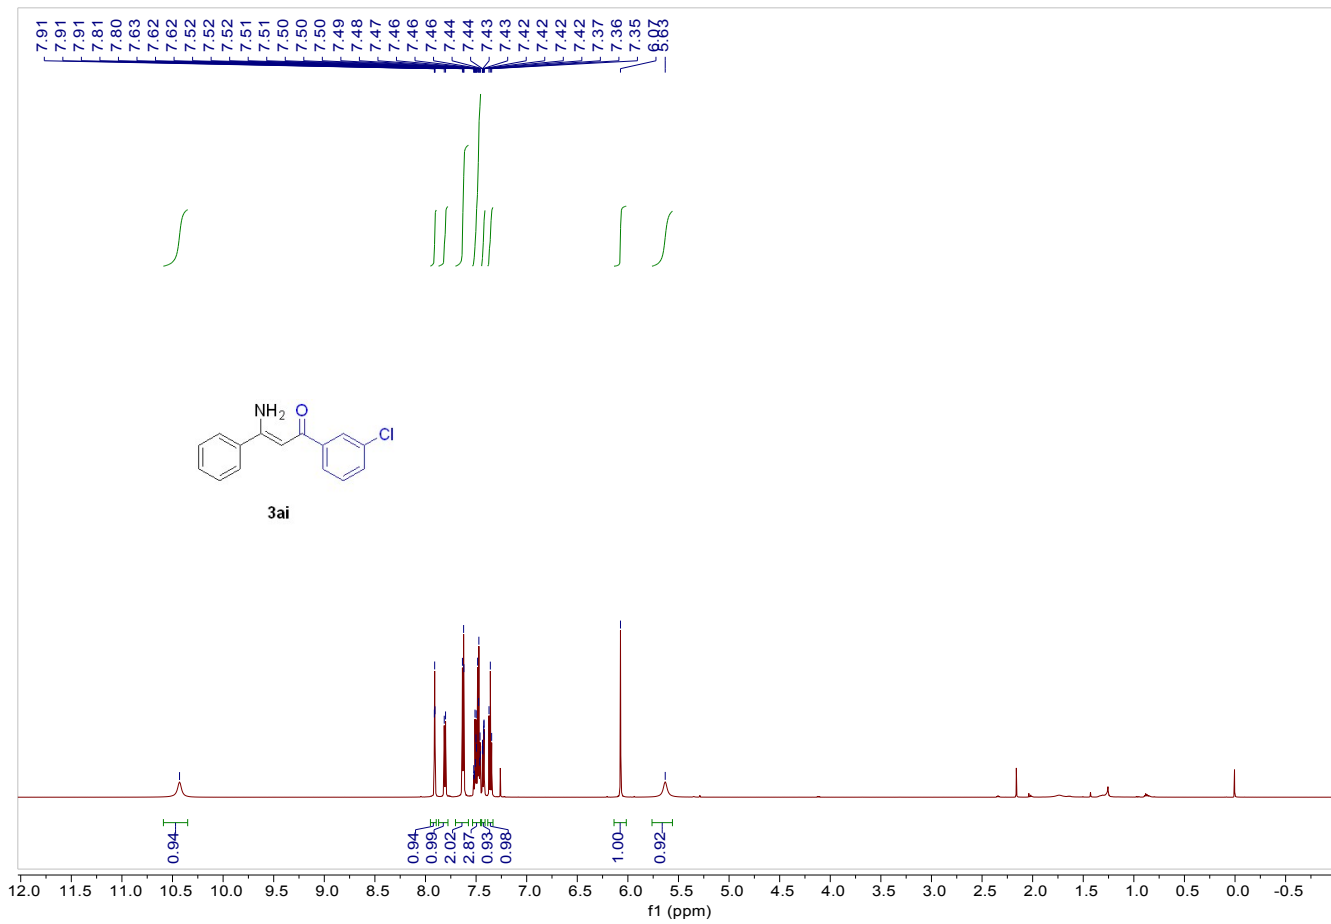

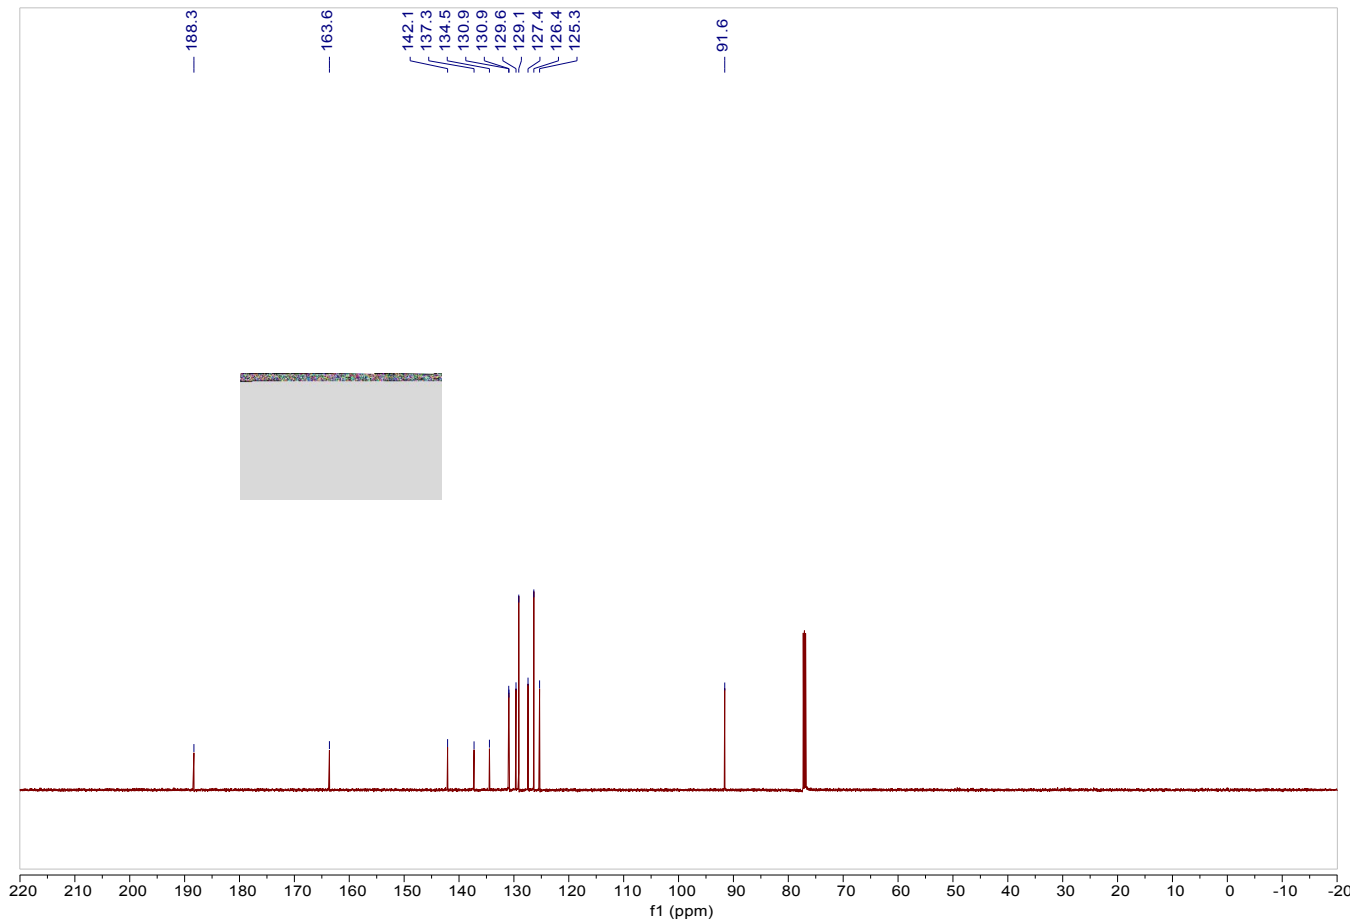

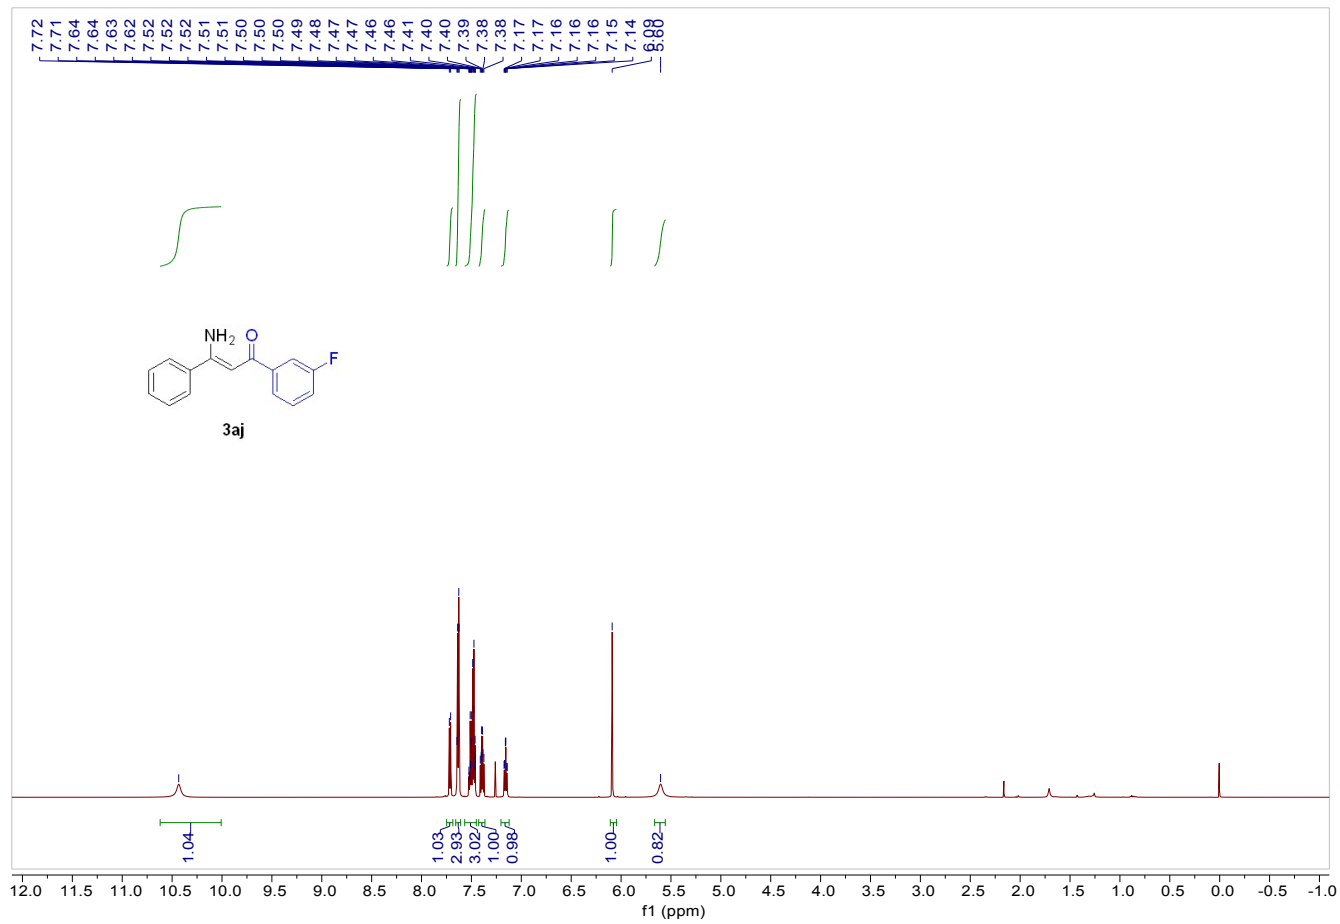

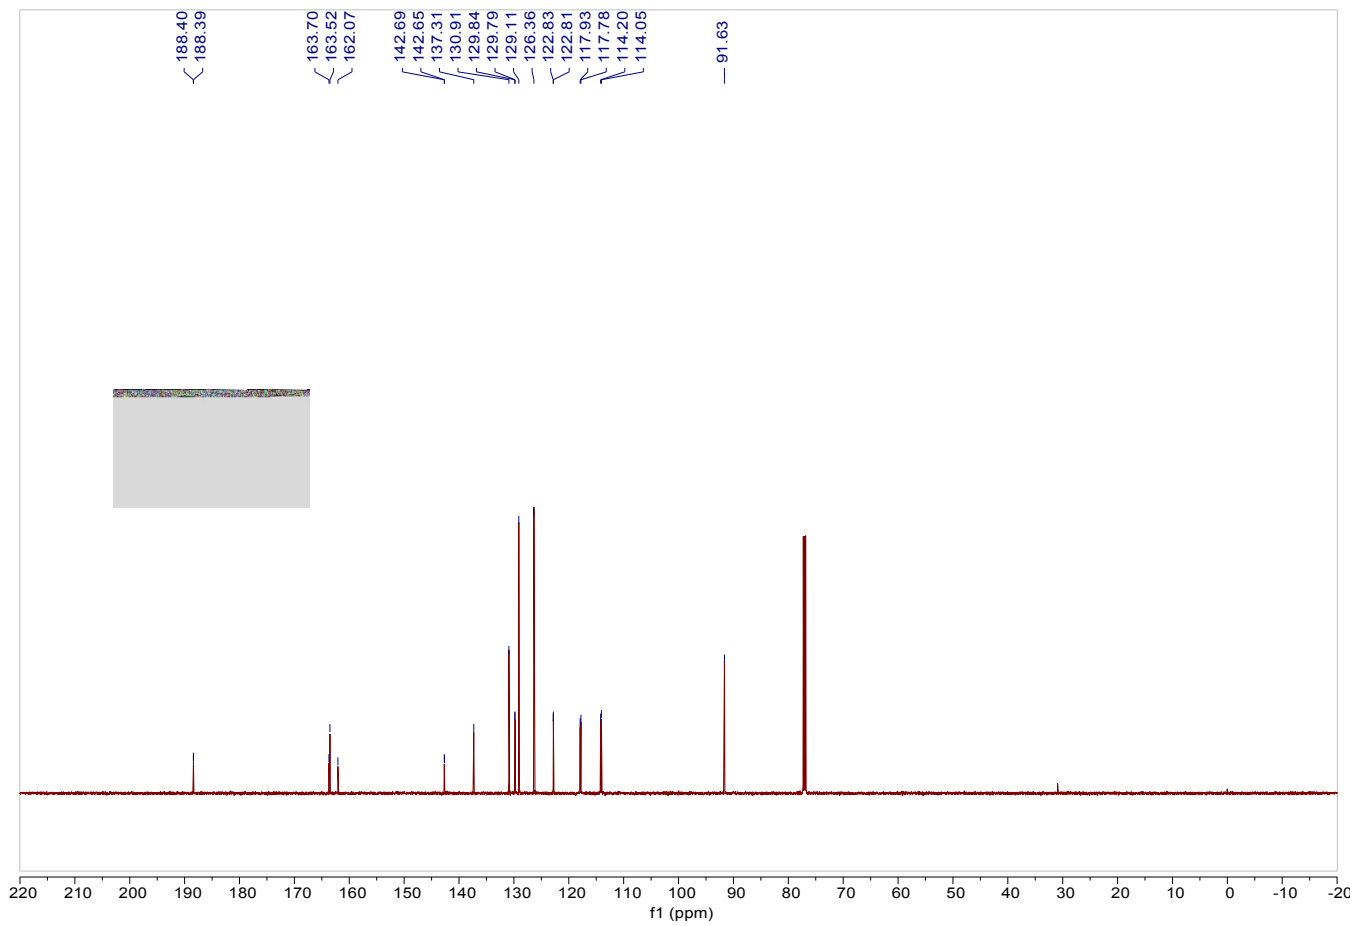

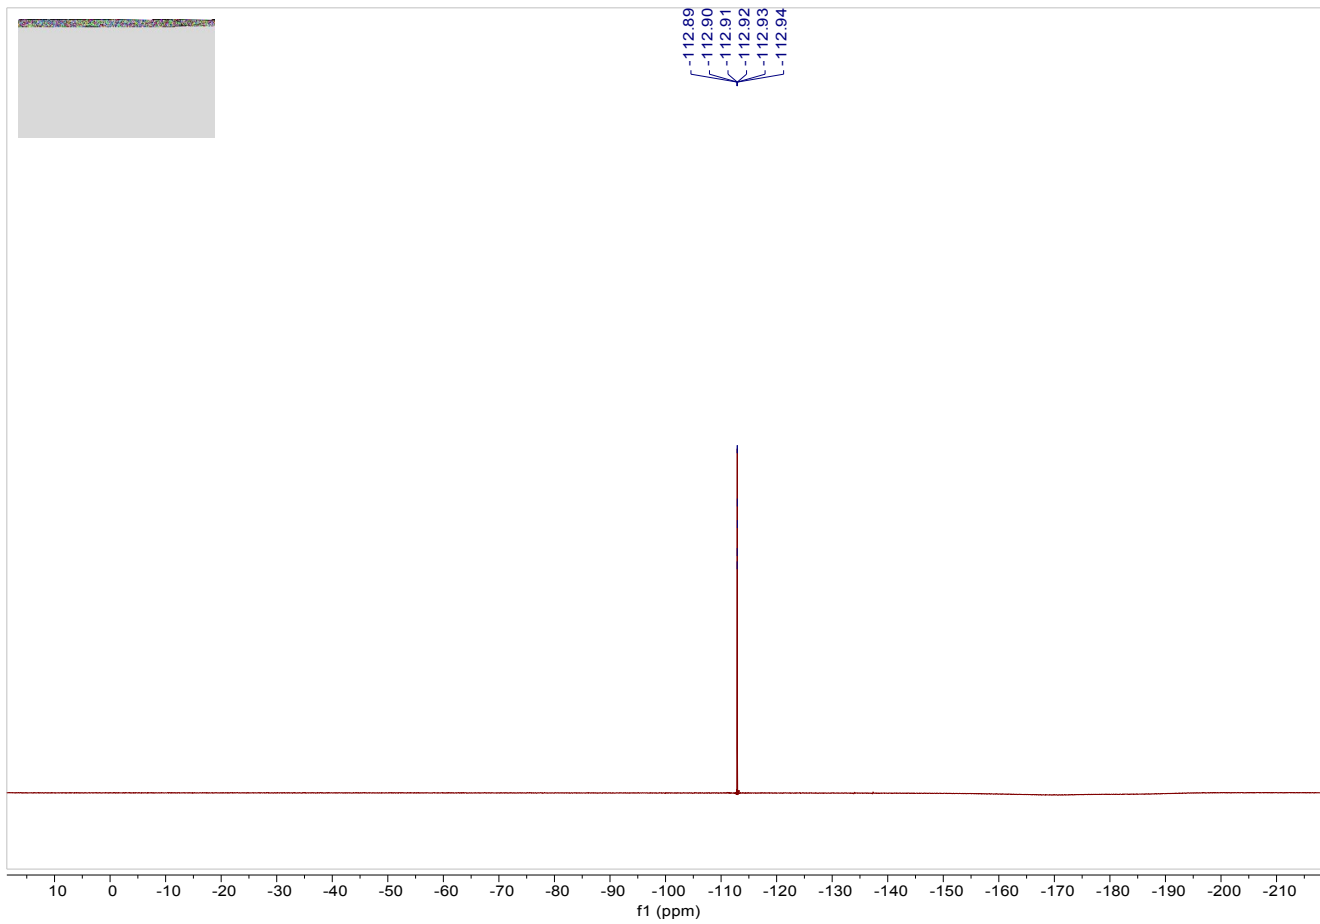

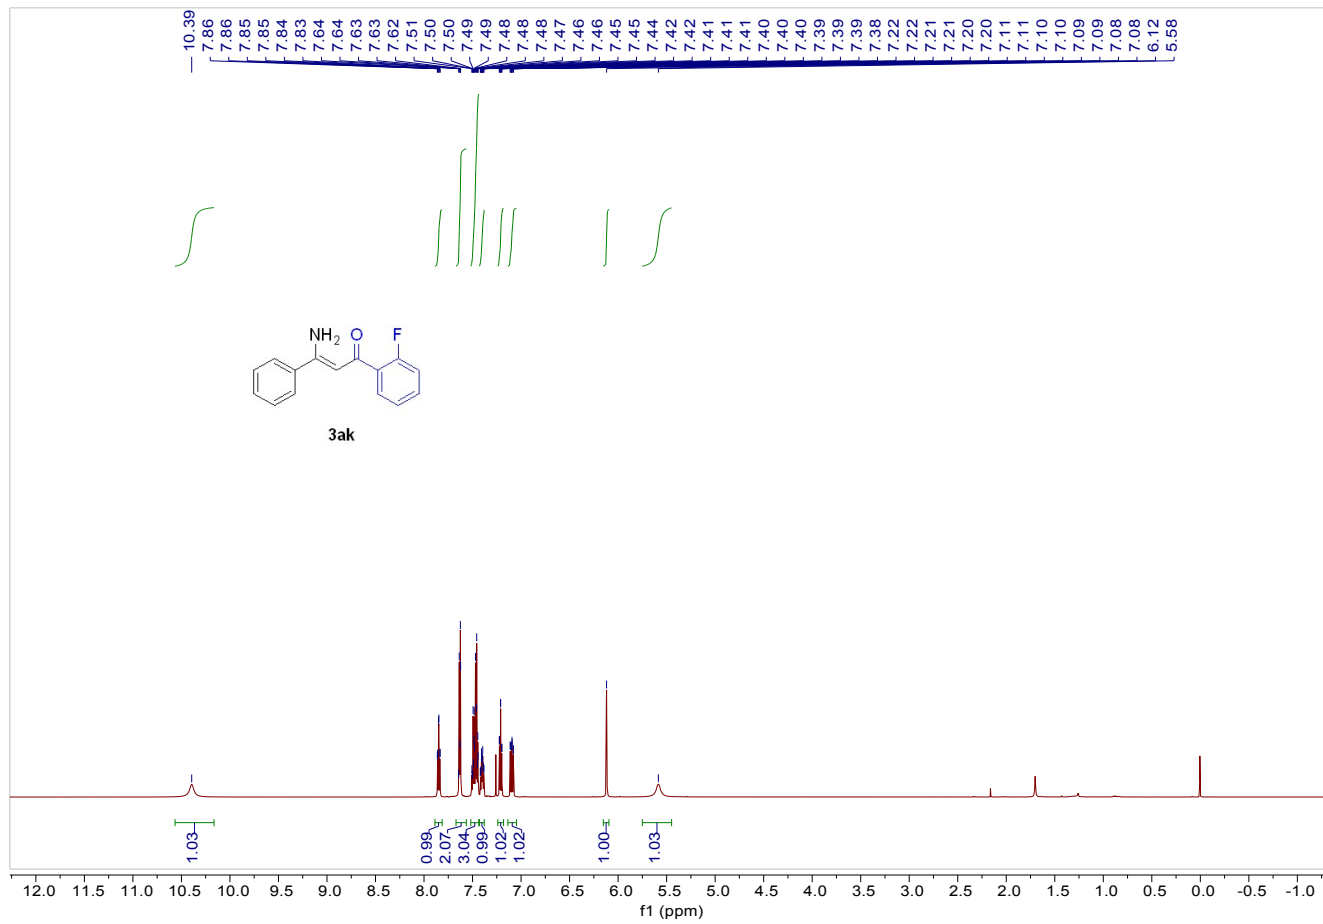



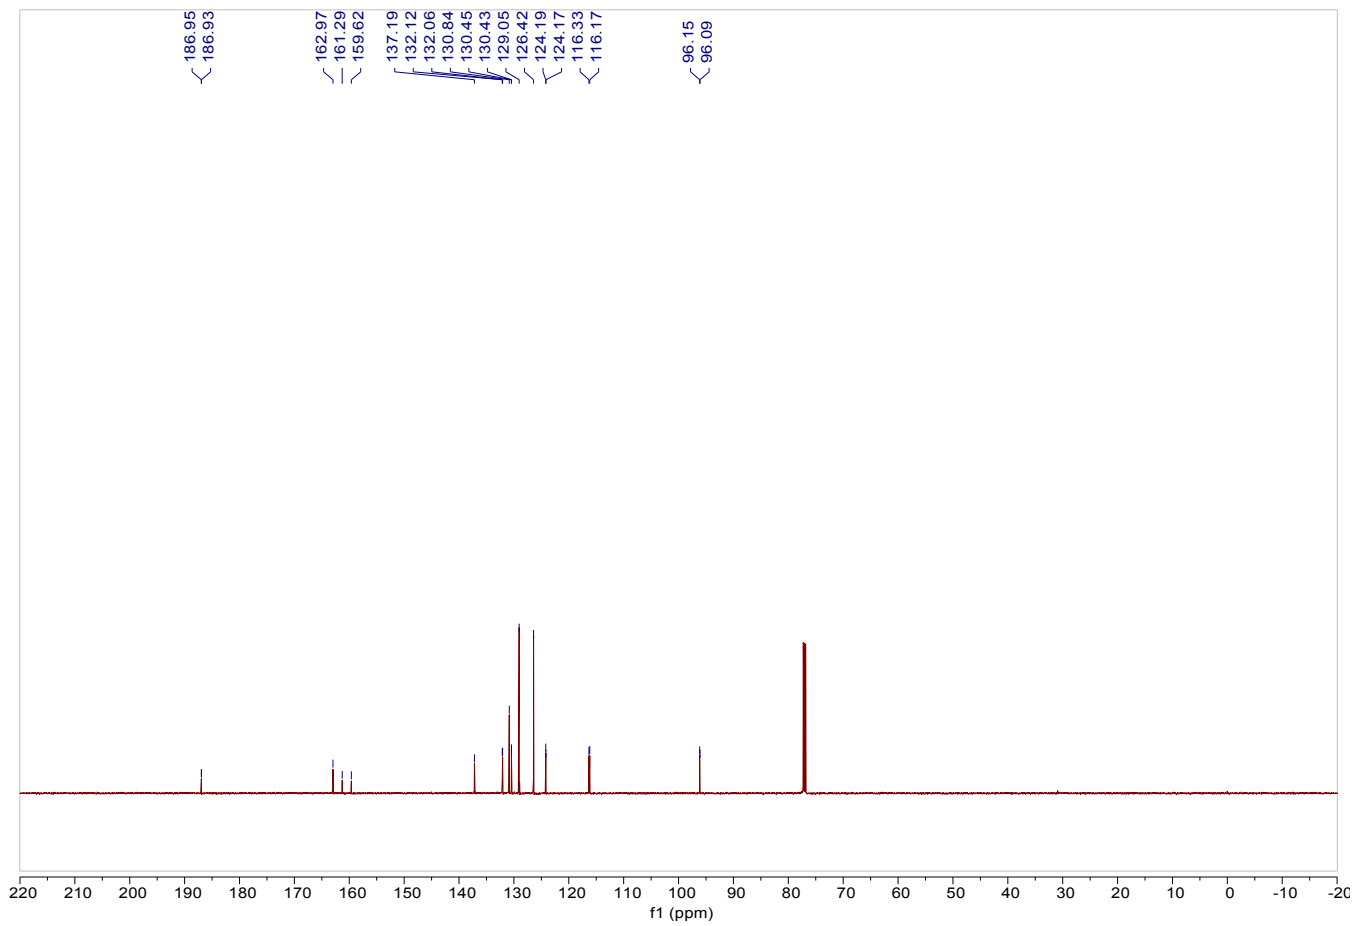

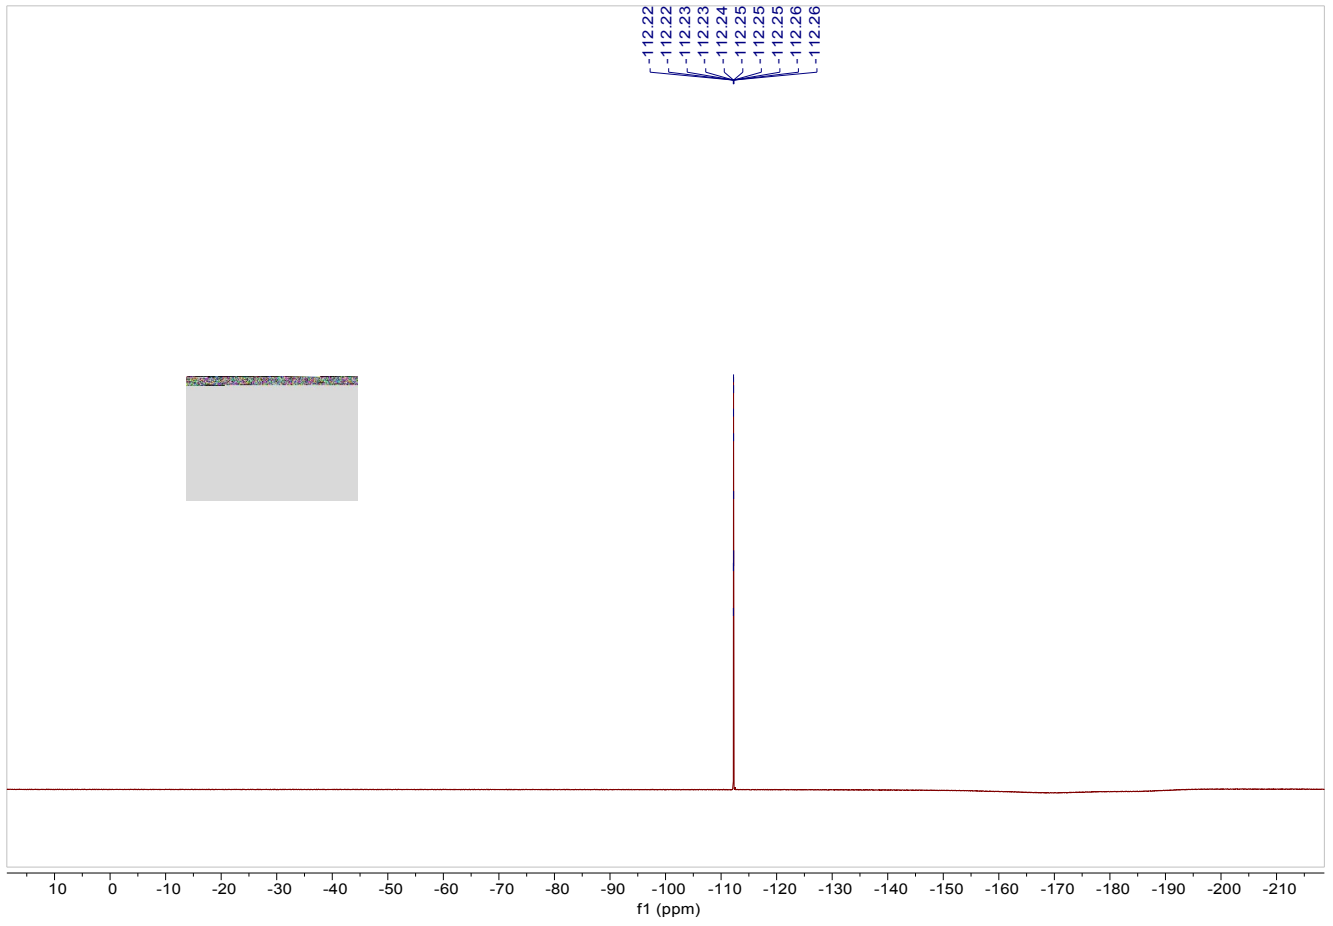

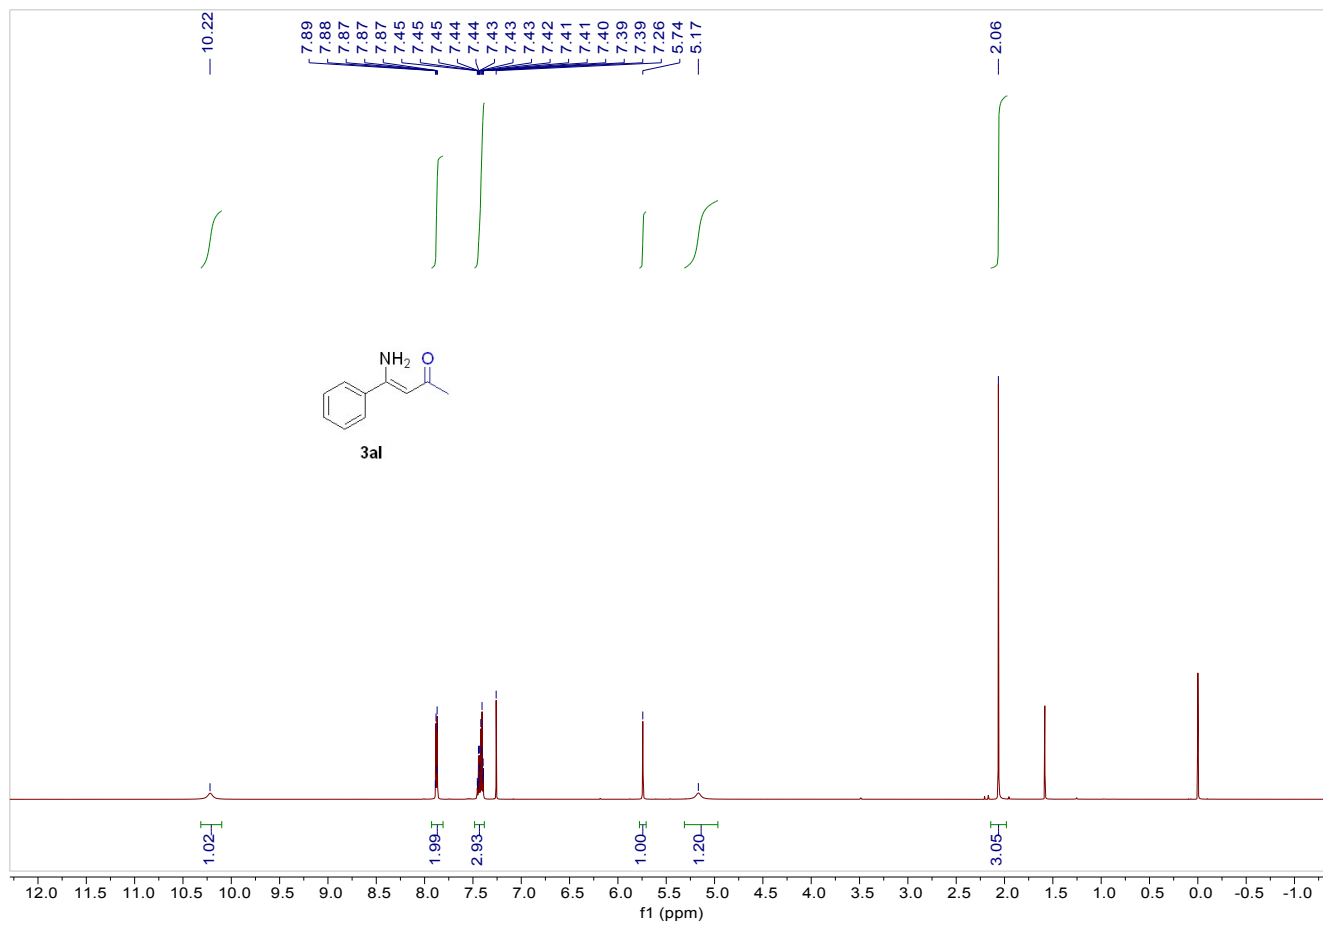

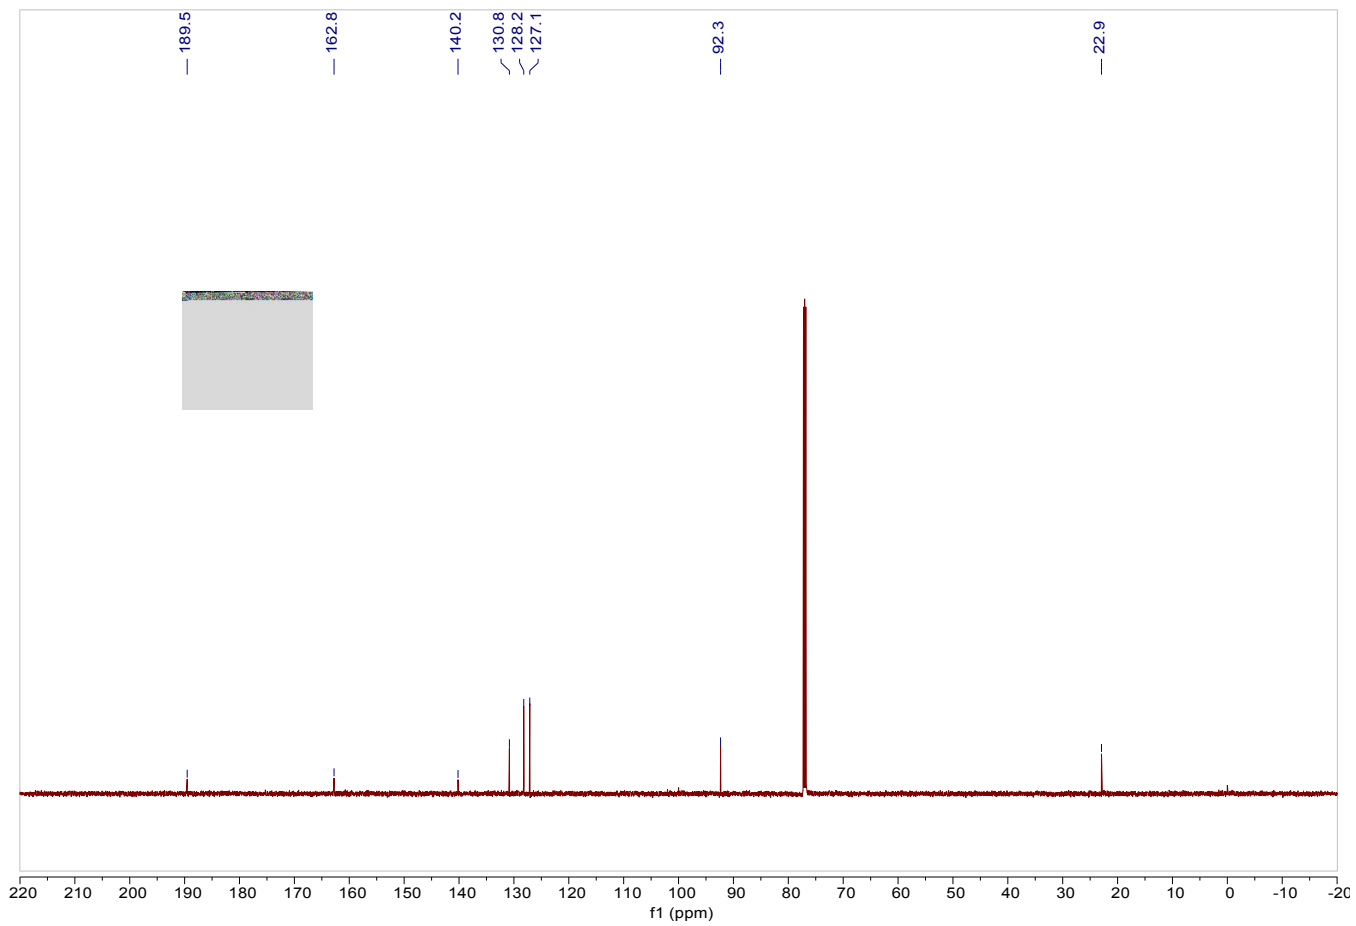

KXQ-HUANGBINGWAN, 1. F1d

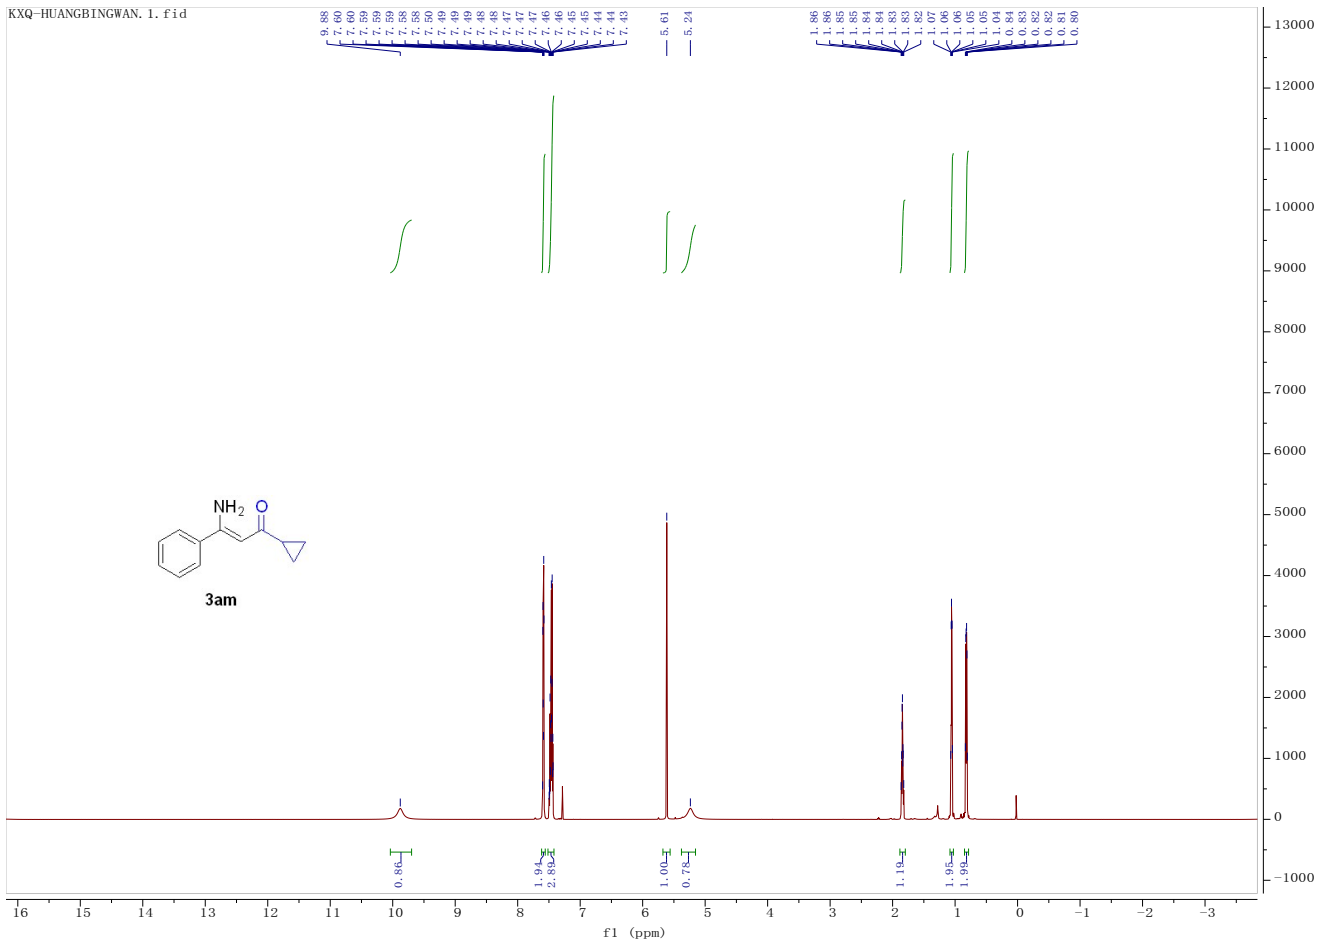

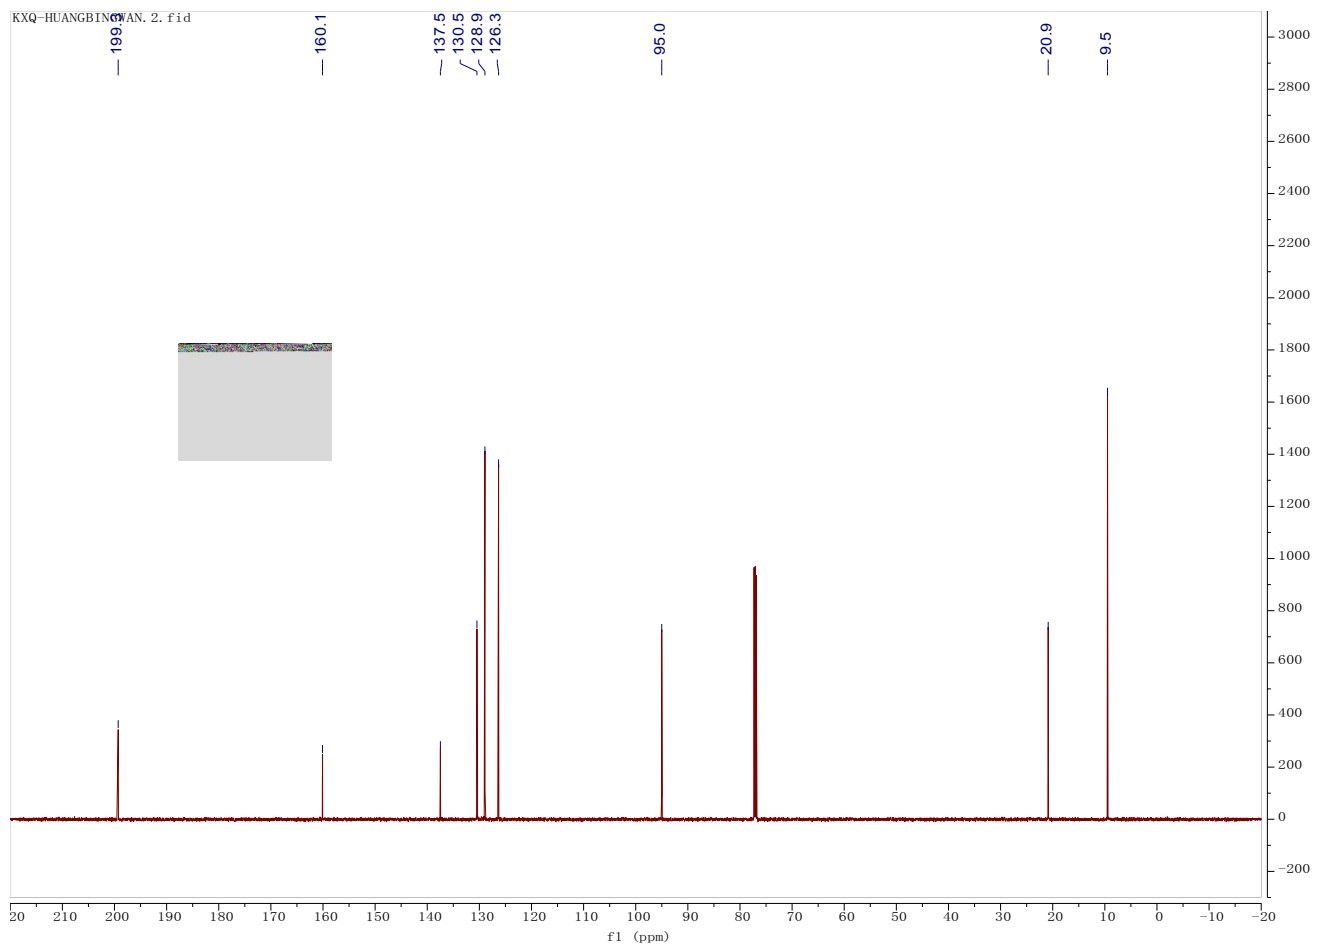

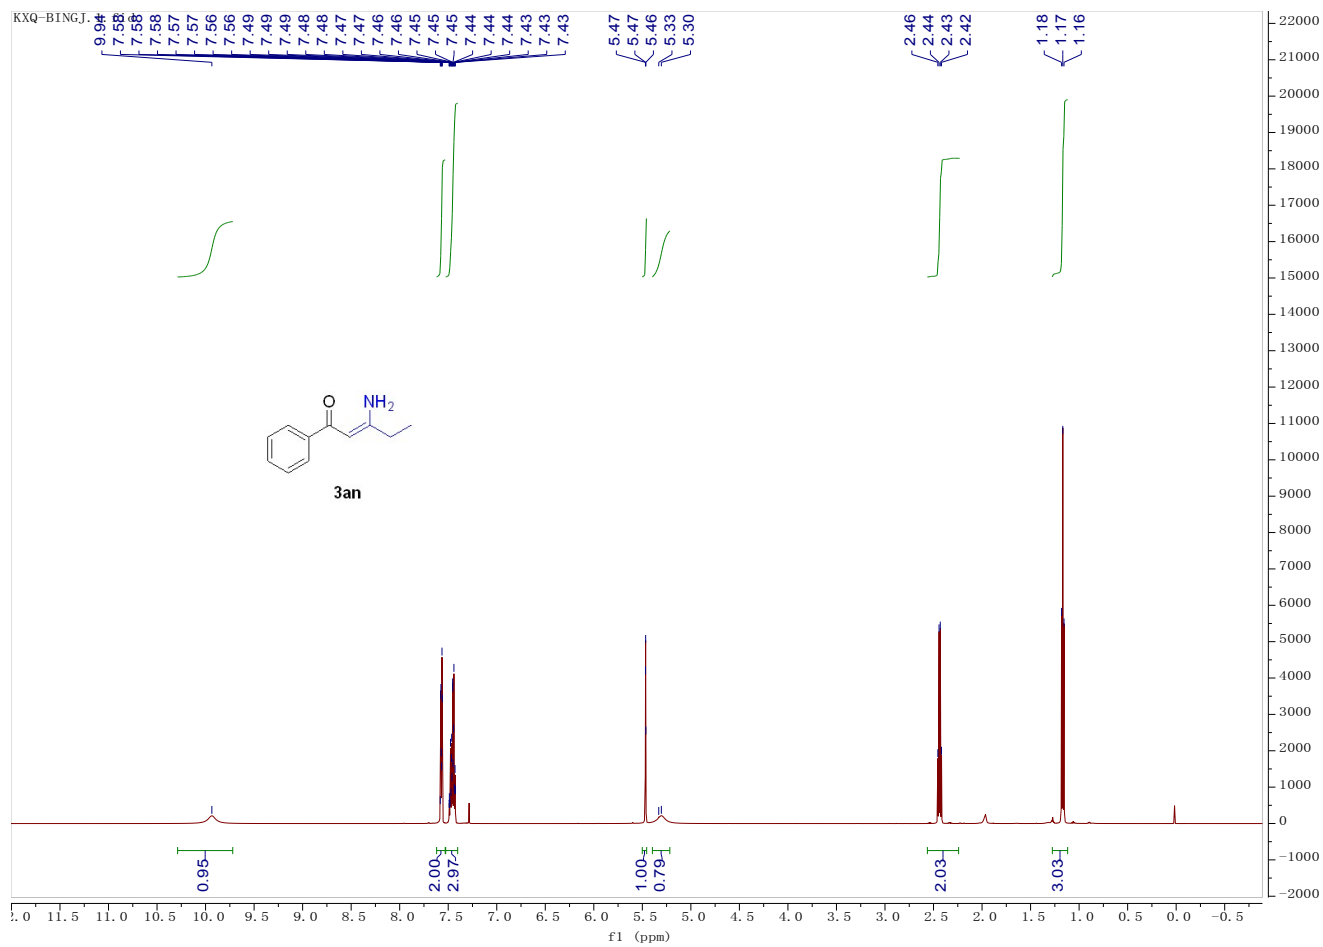

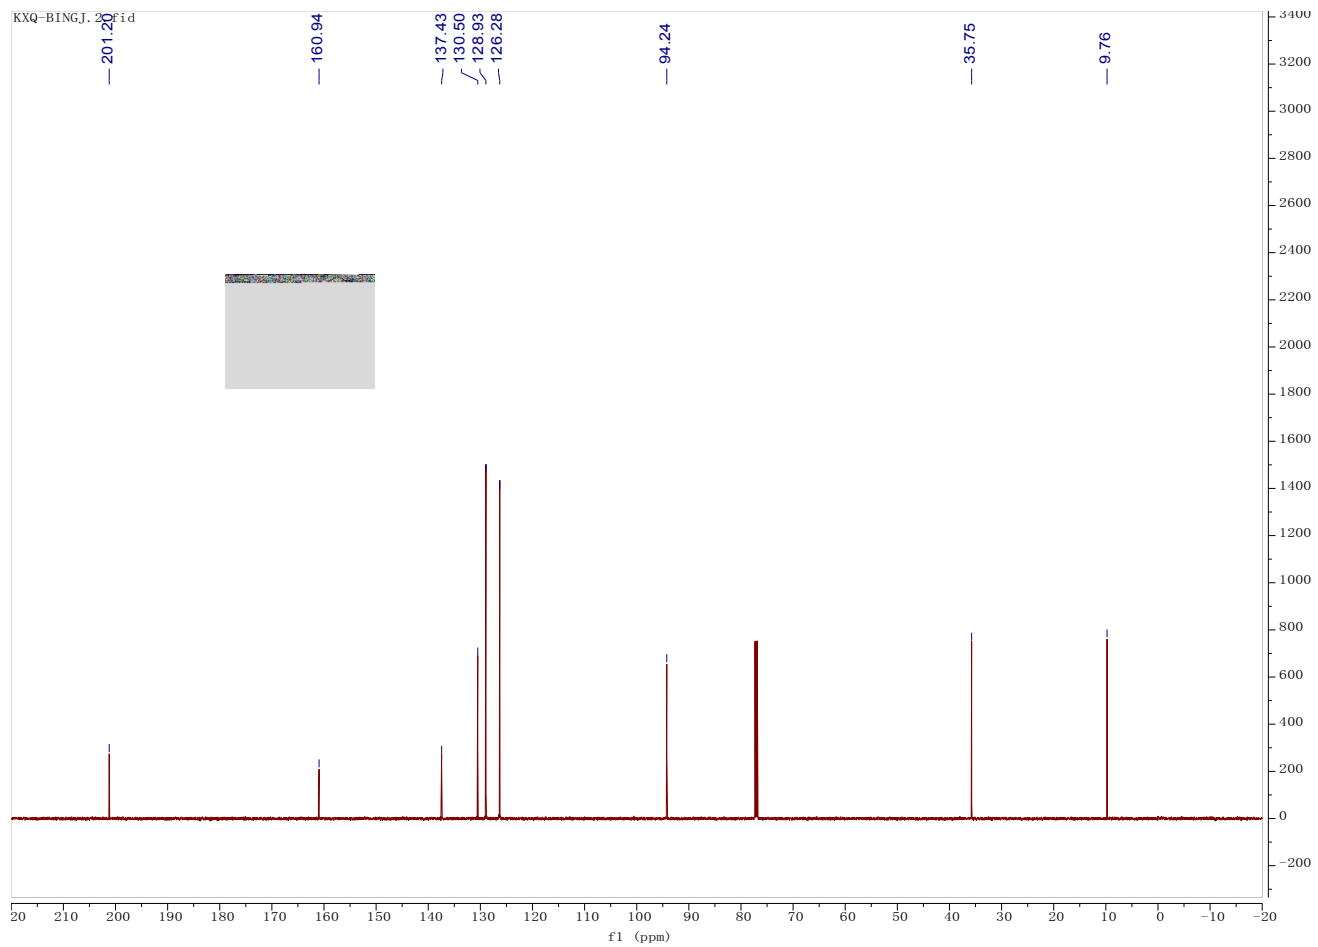



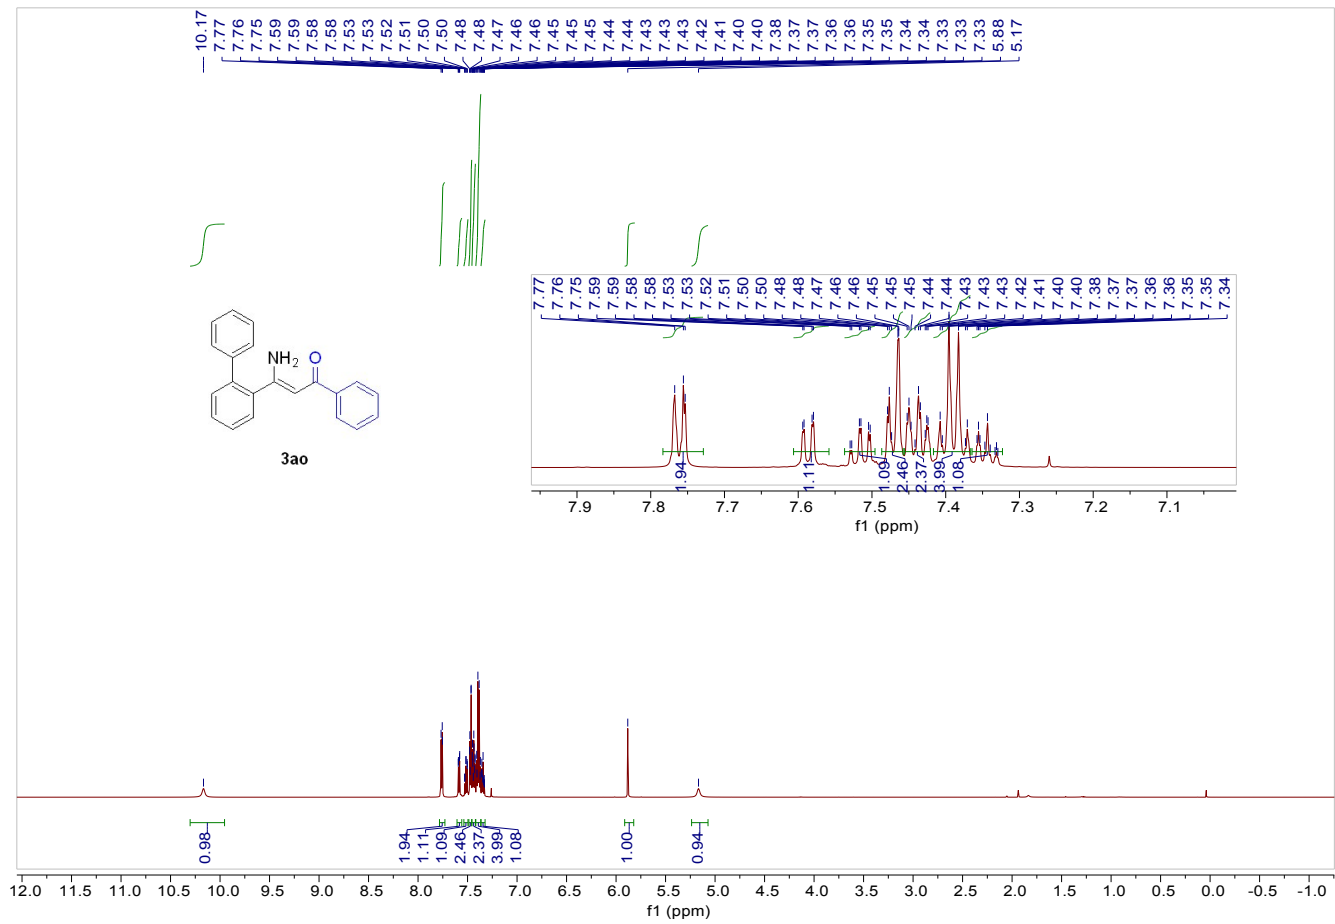

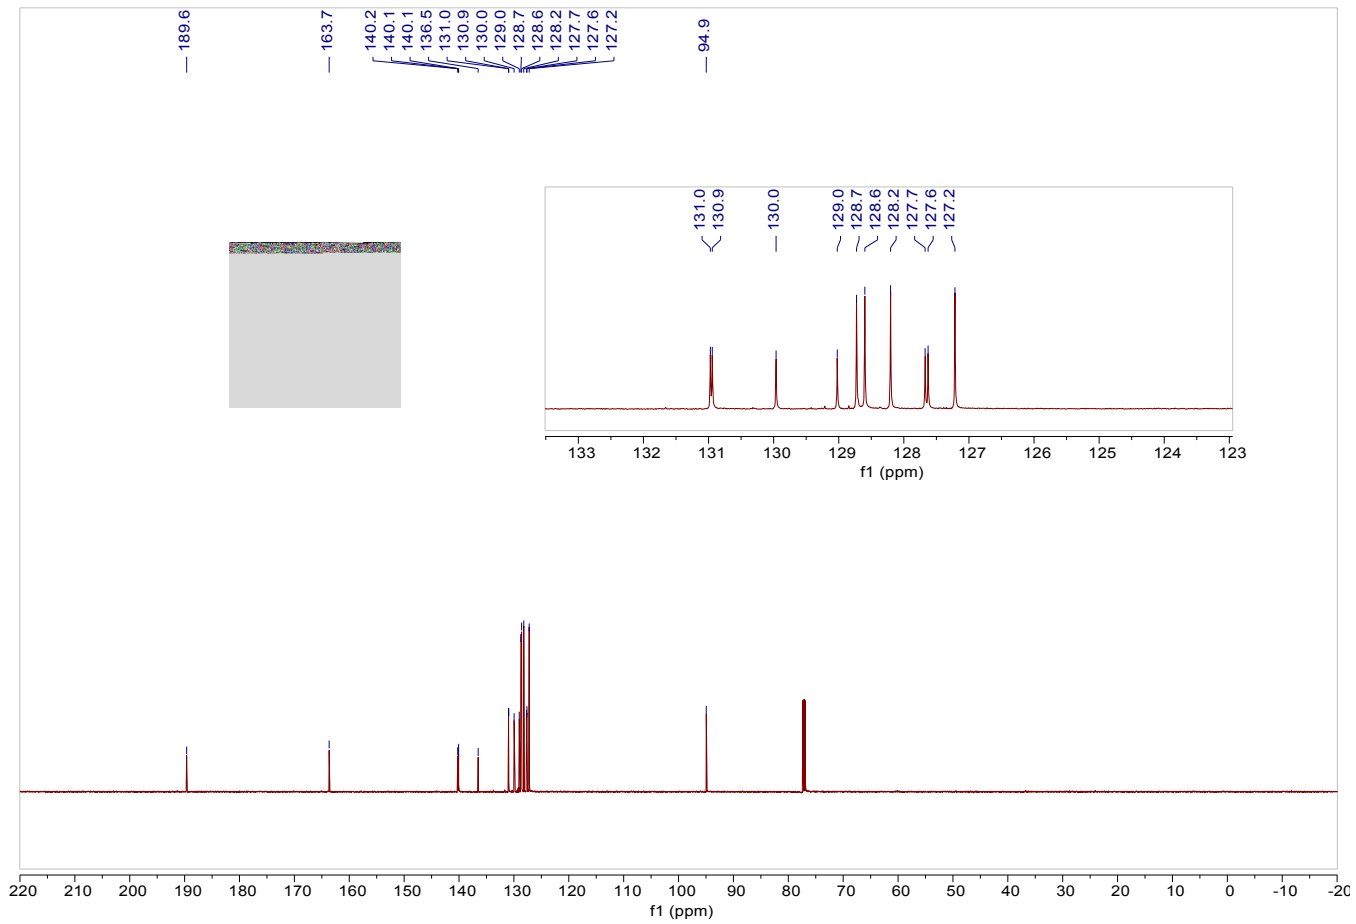

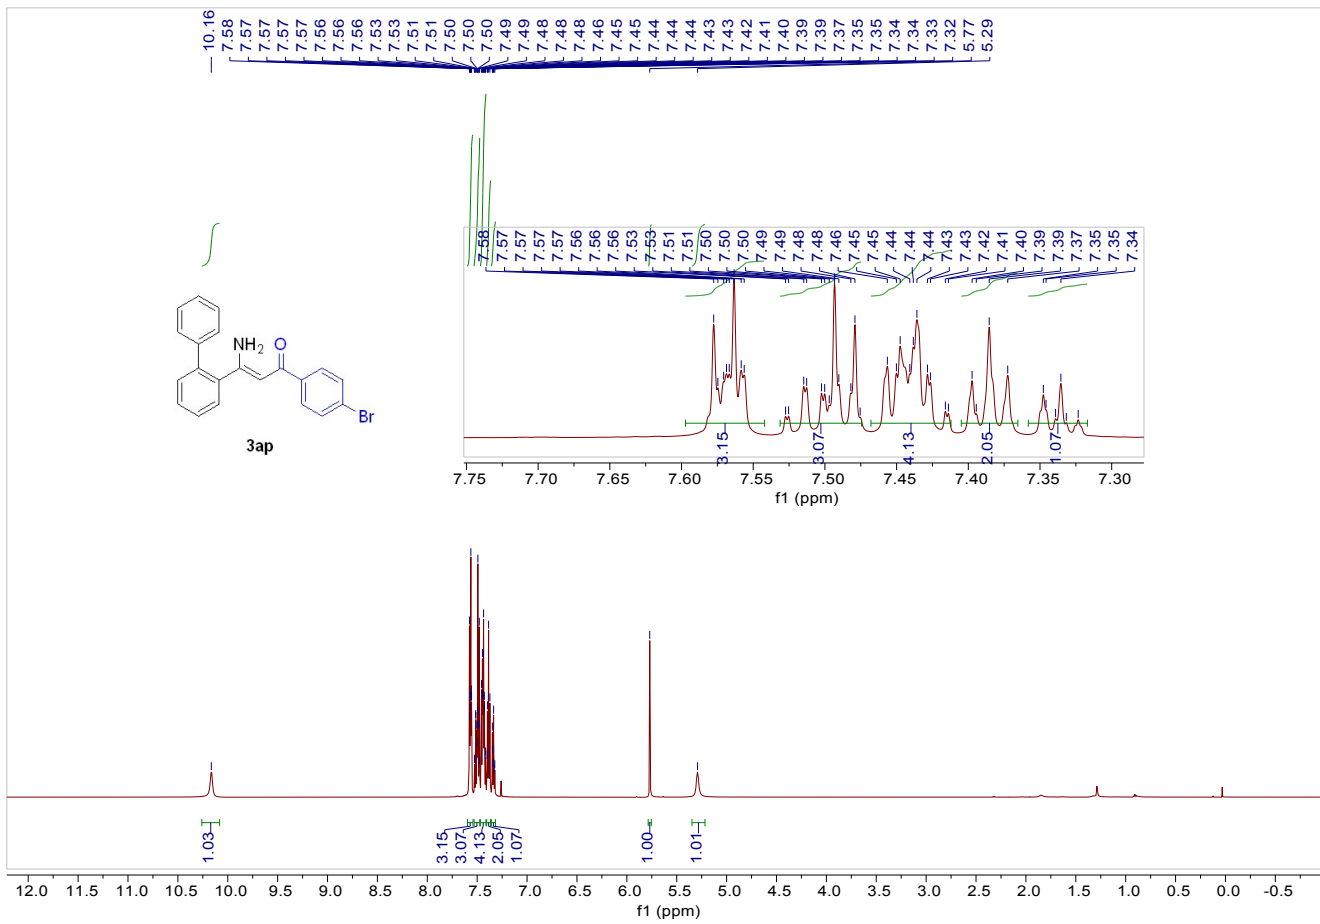

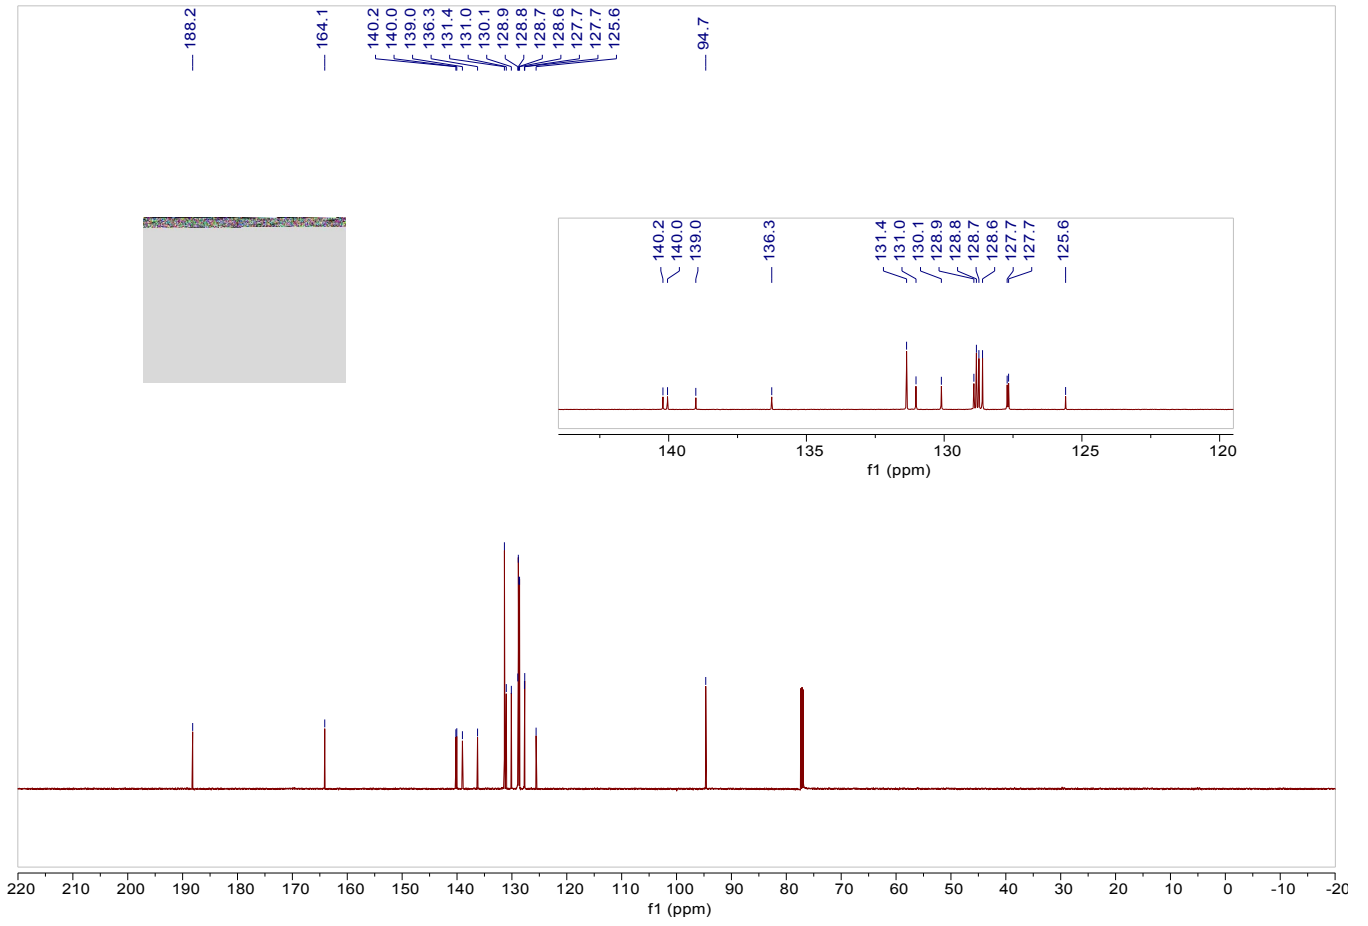

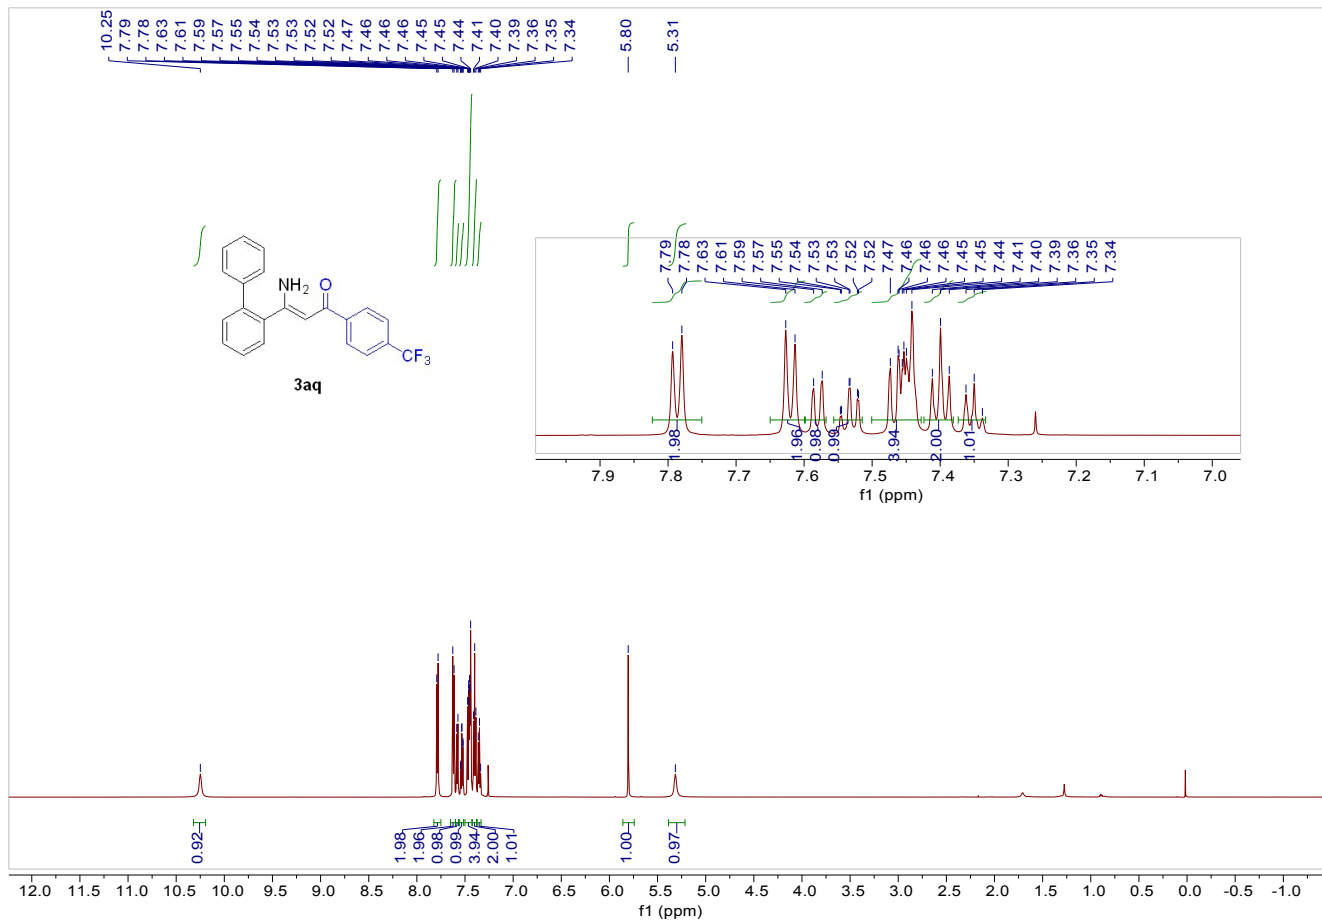

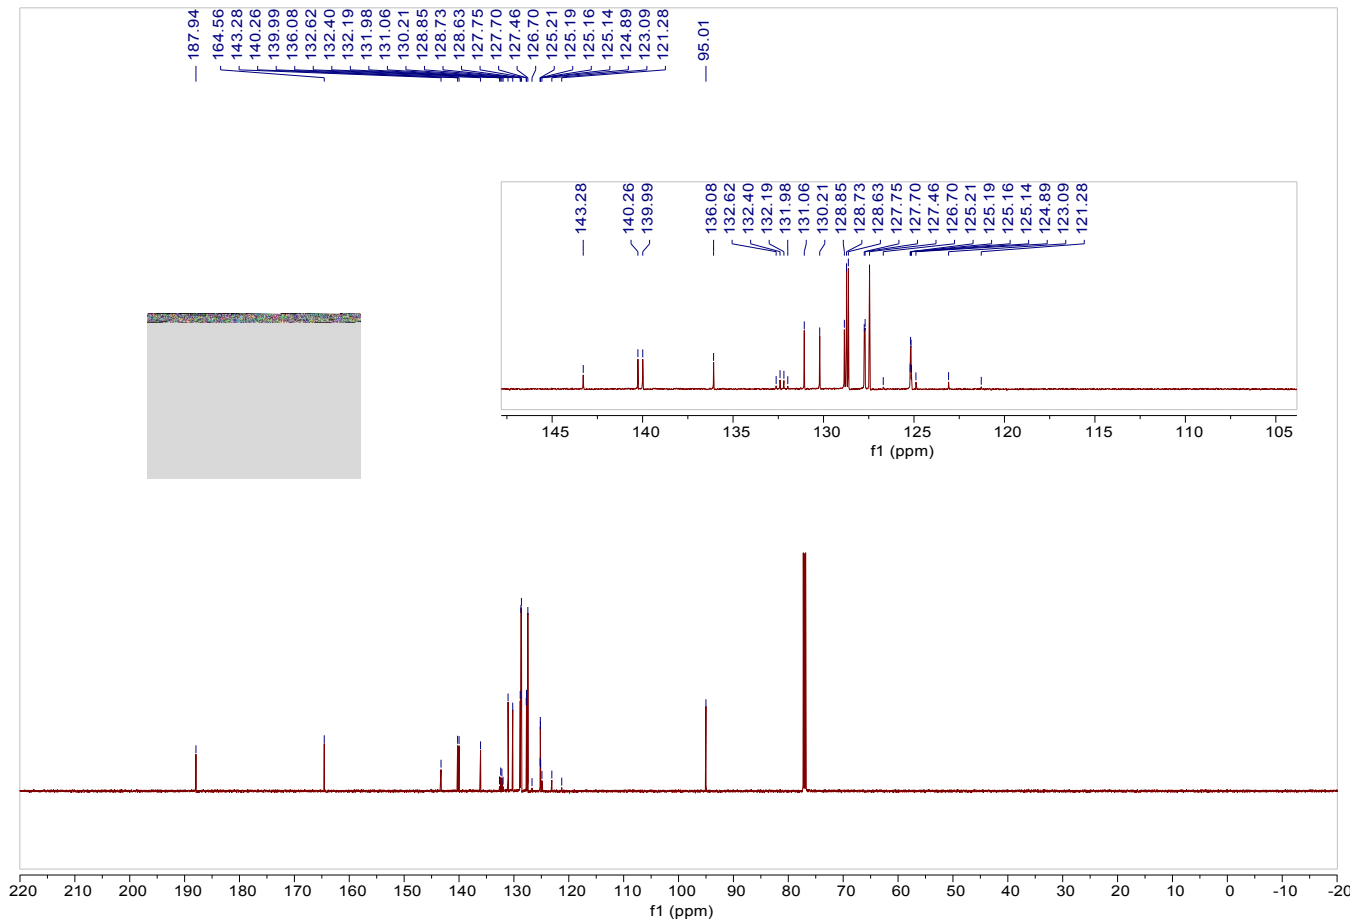

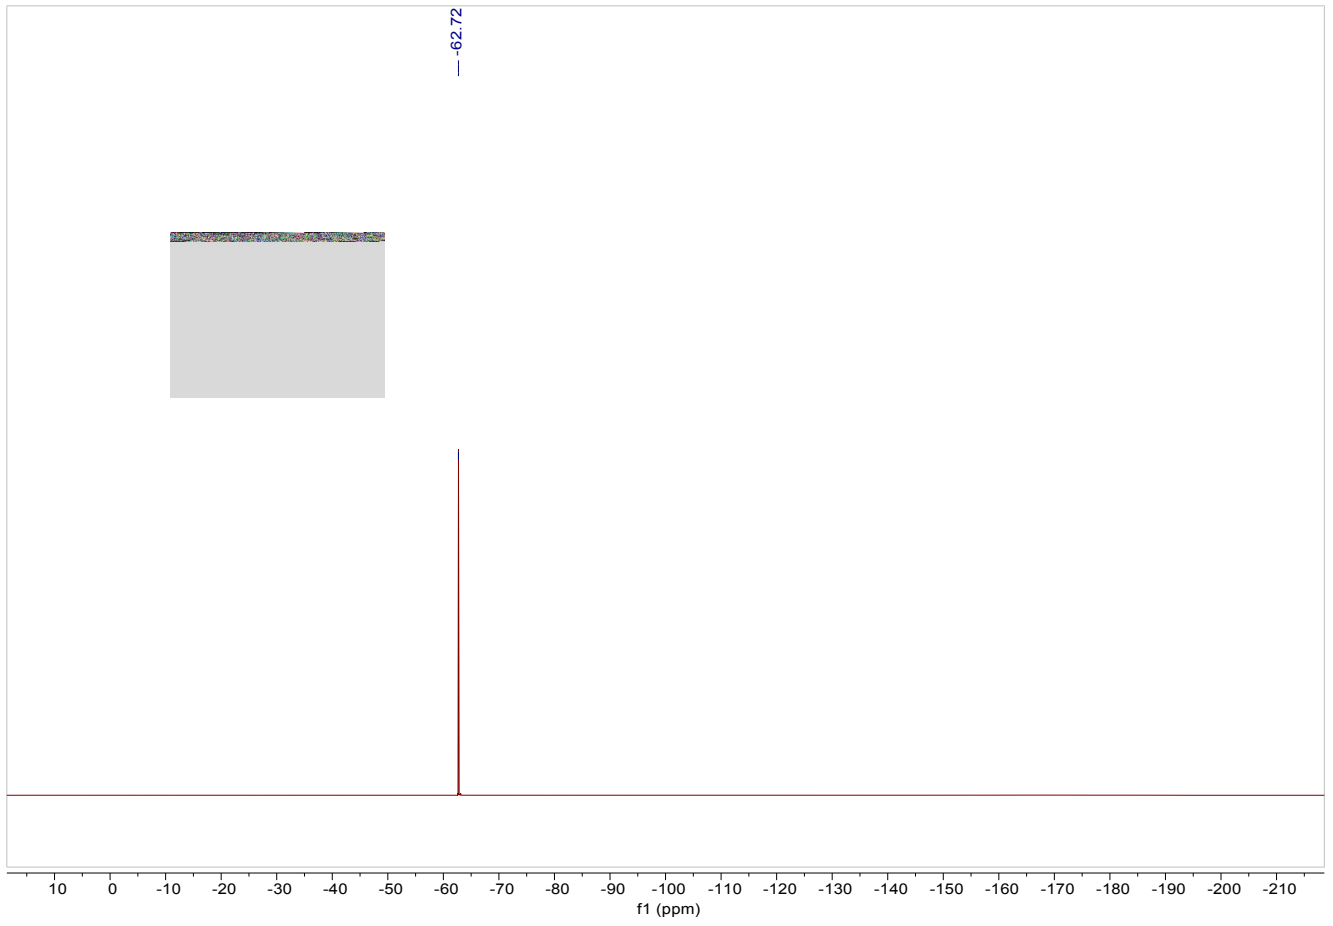

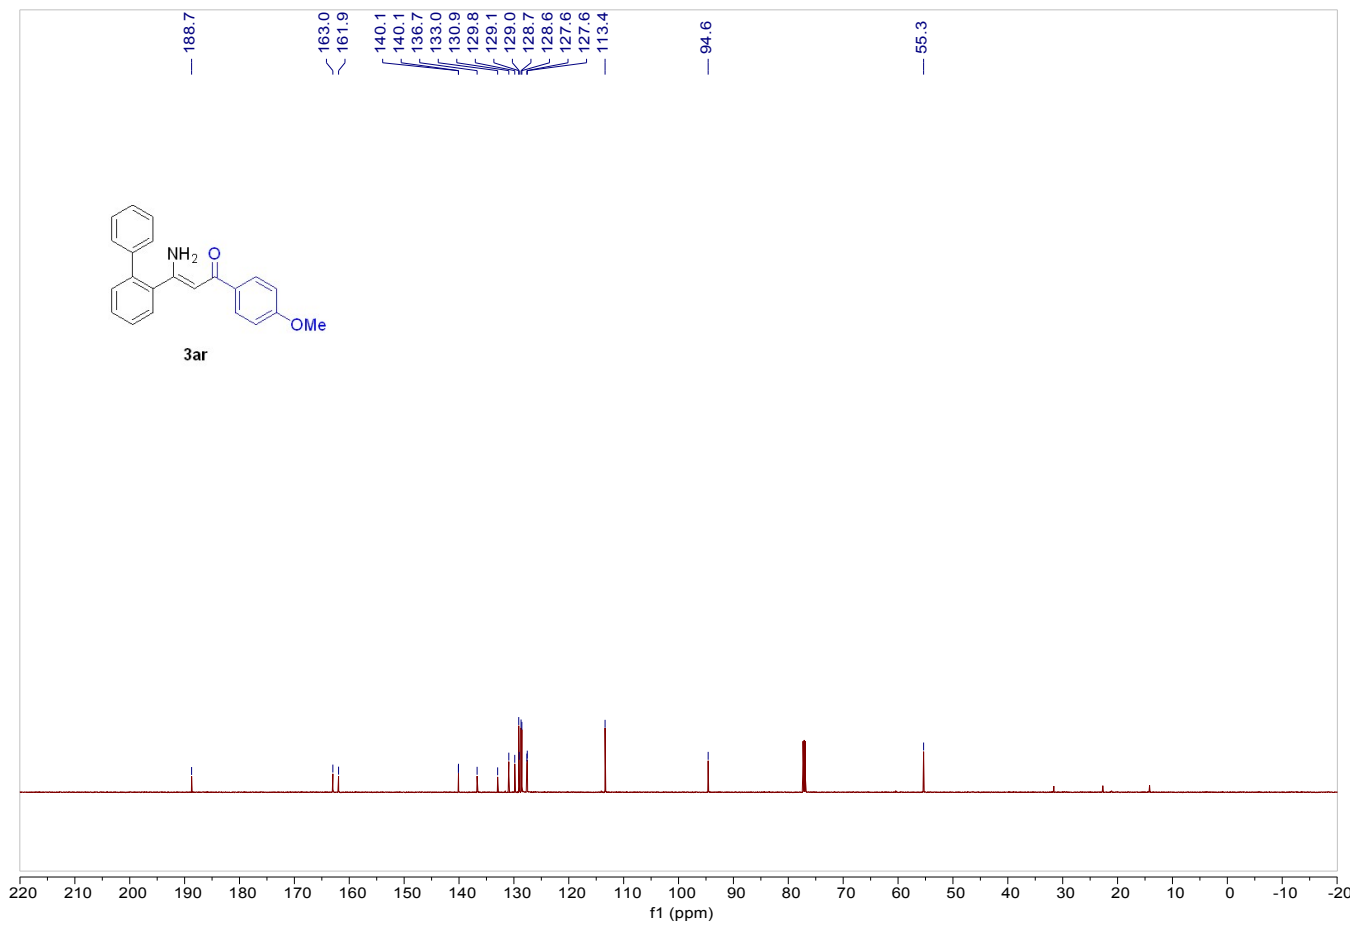



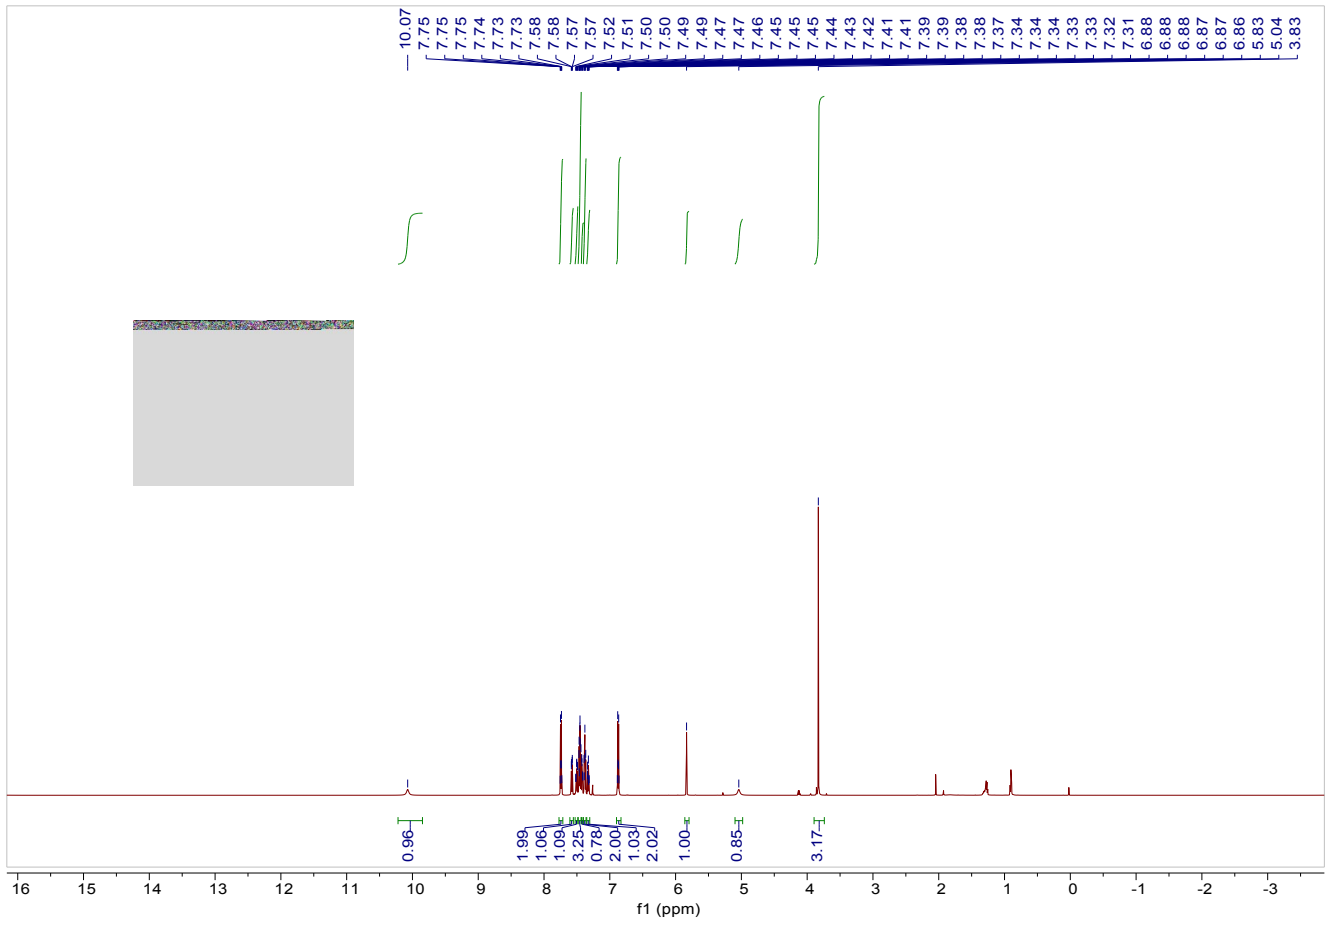



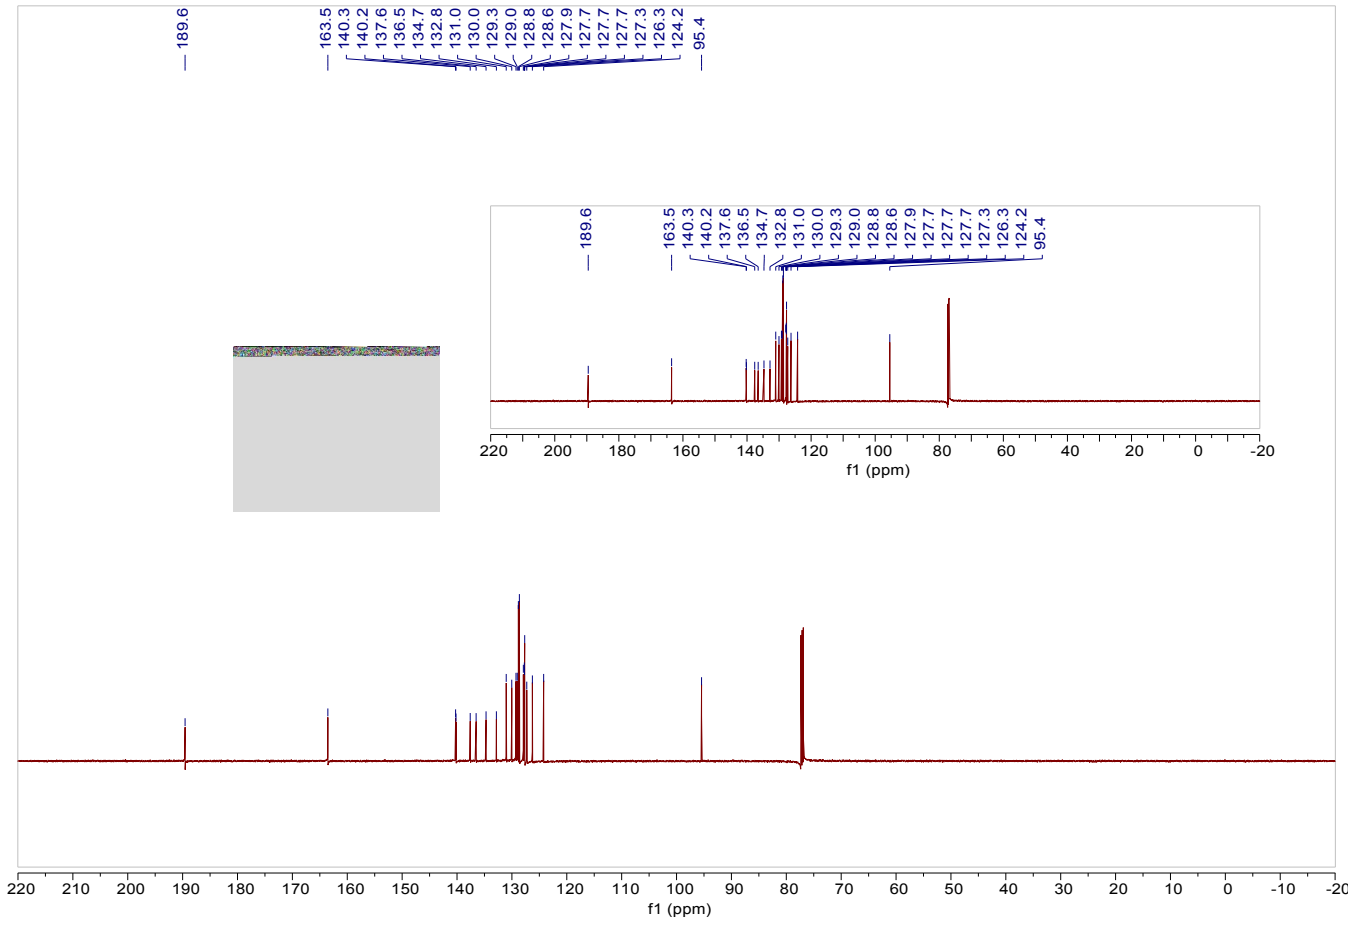

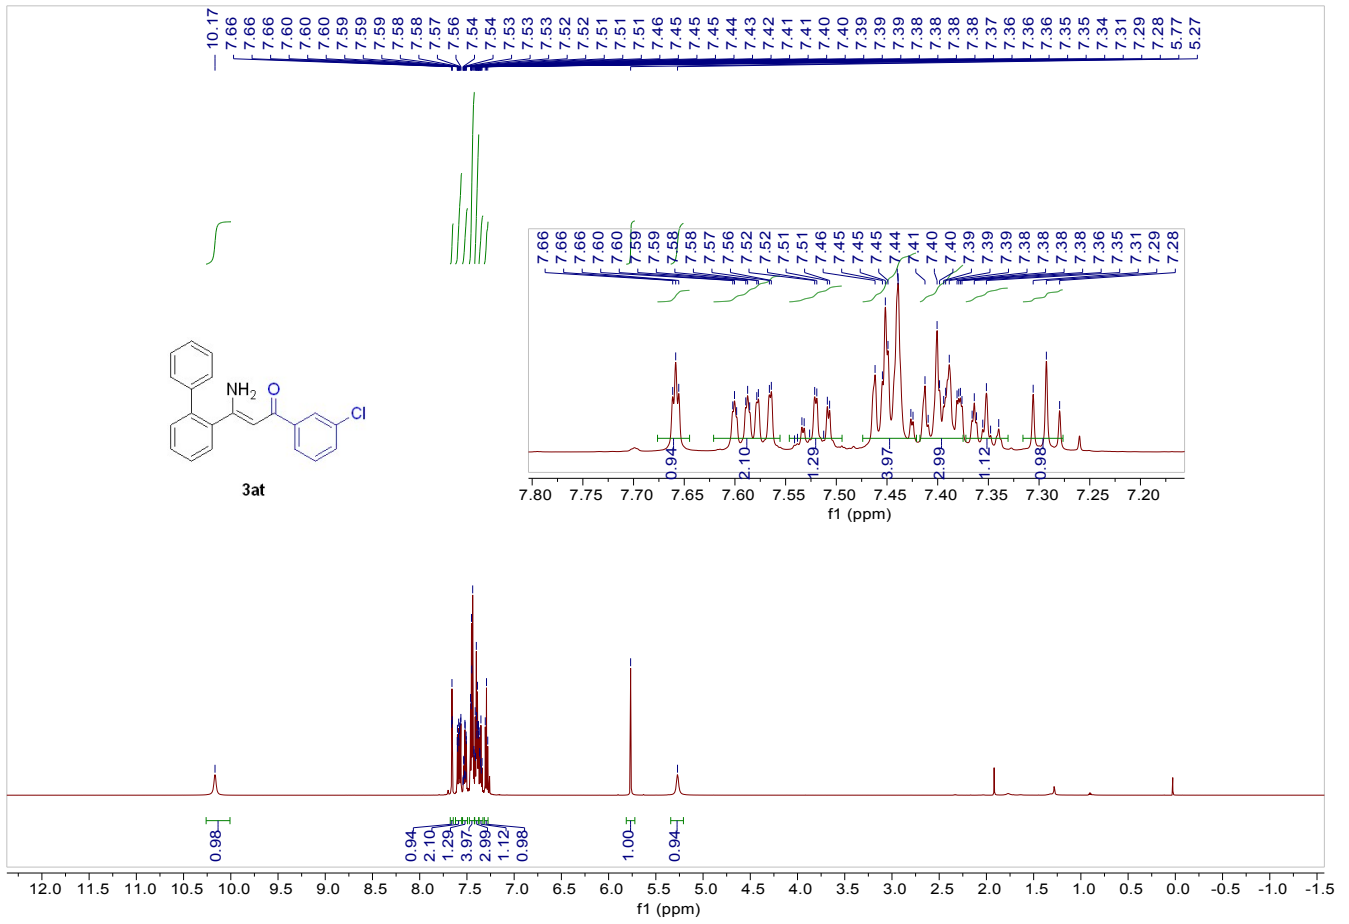

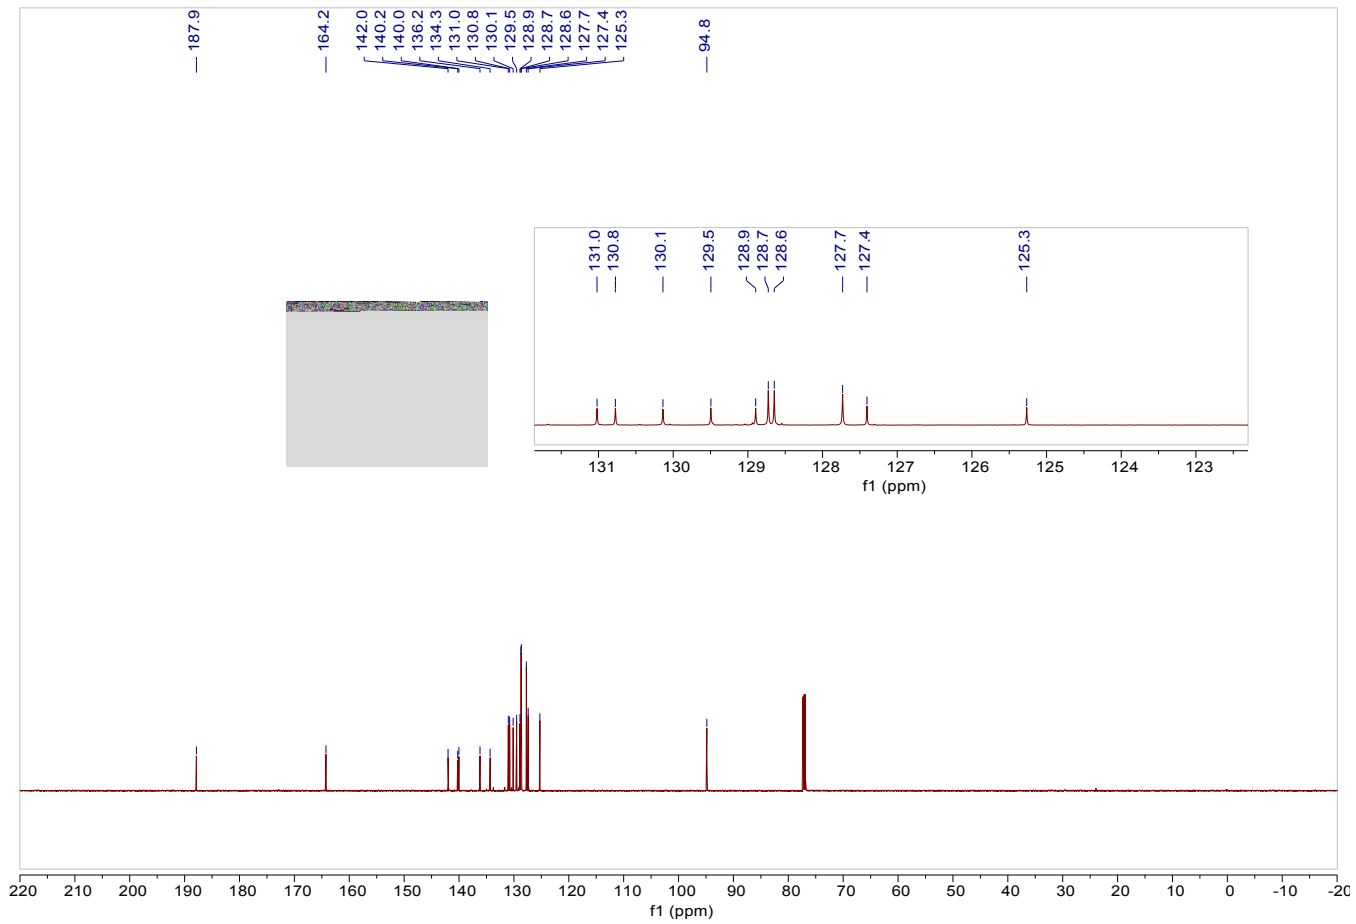

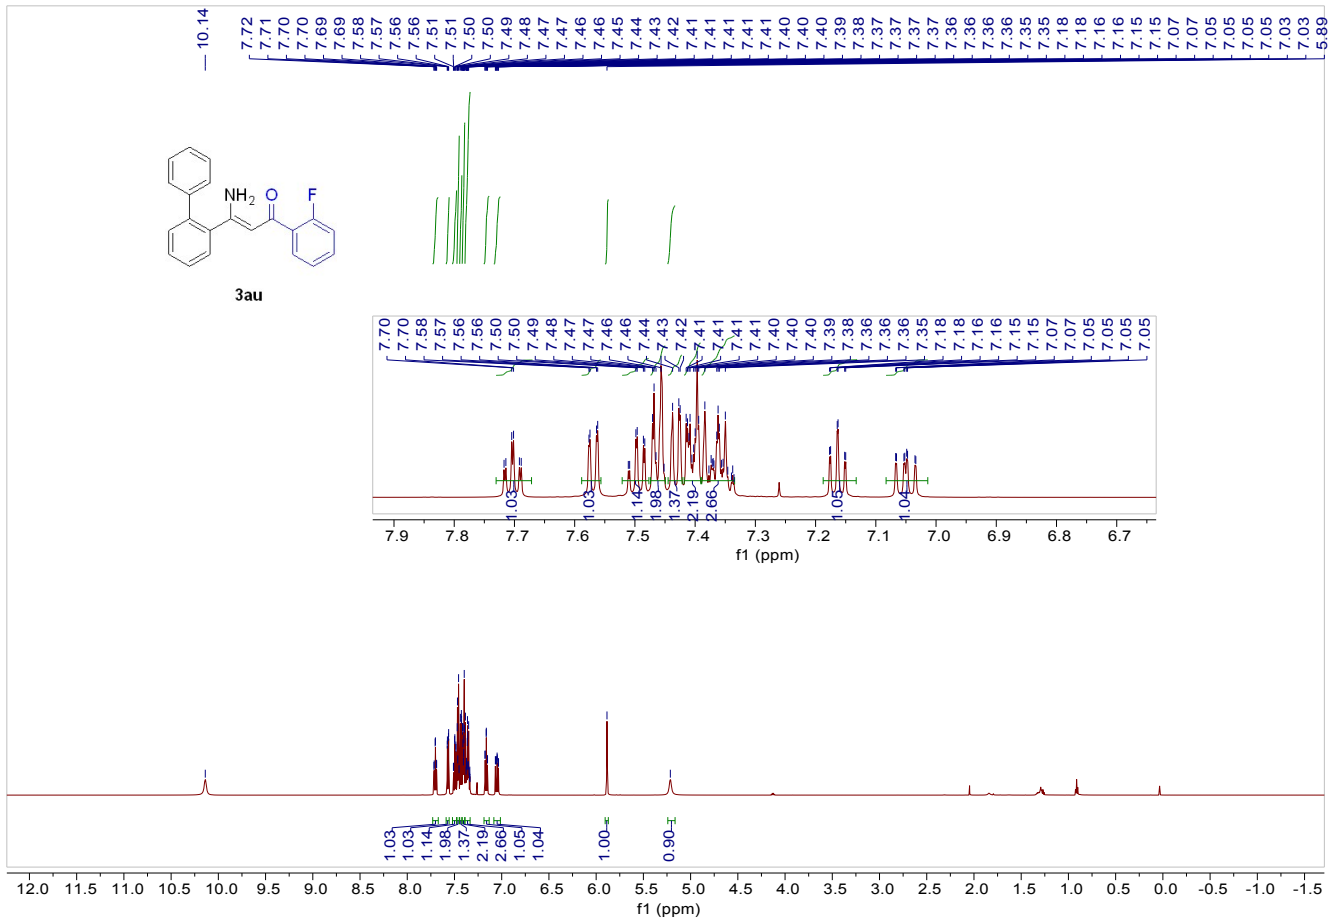

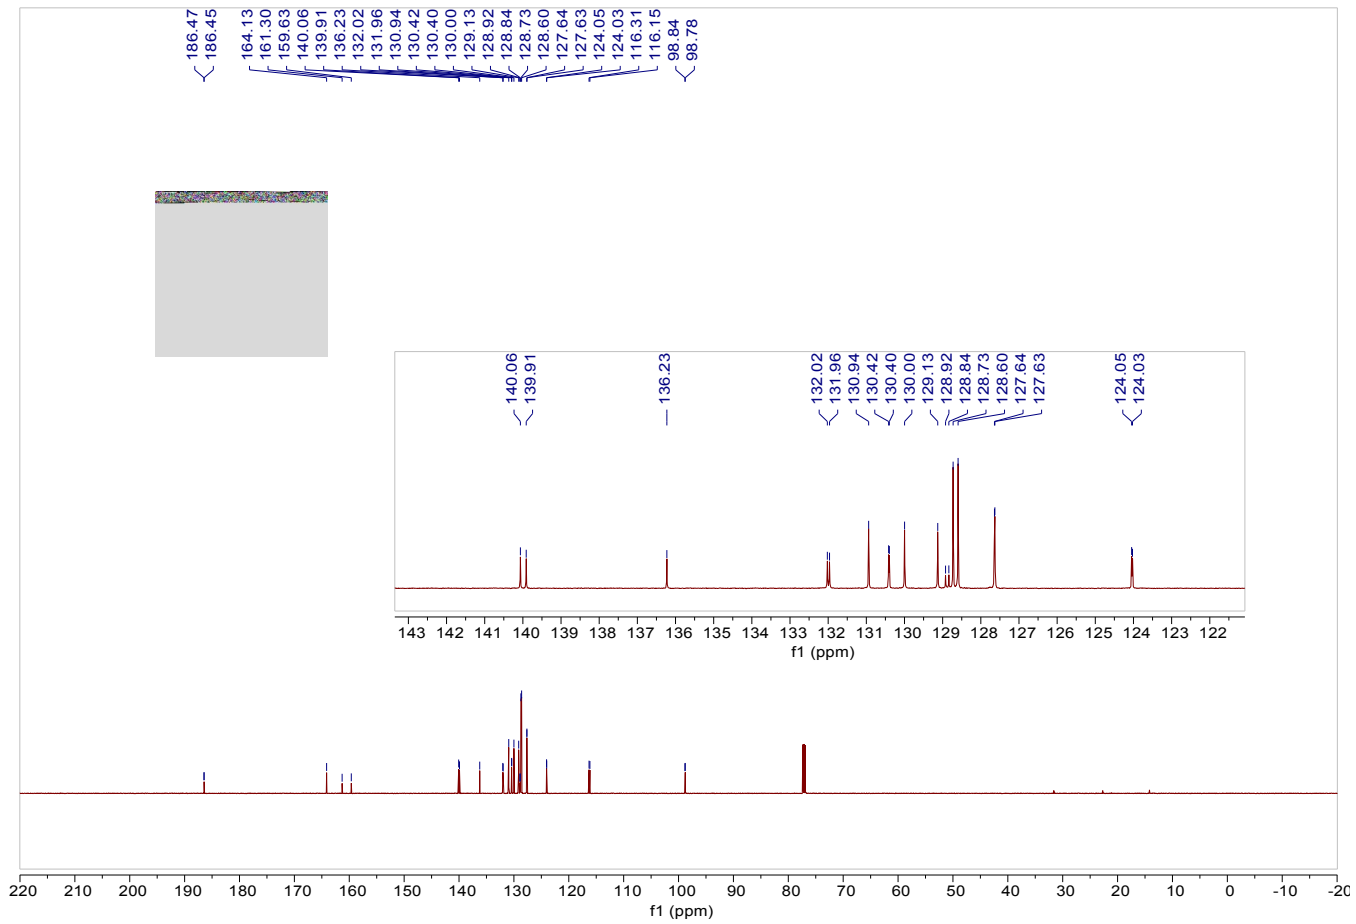

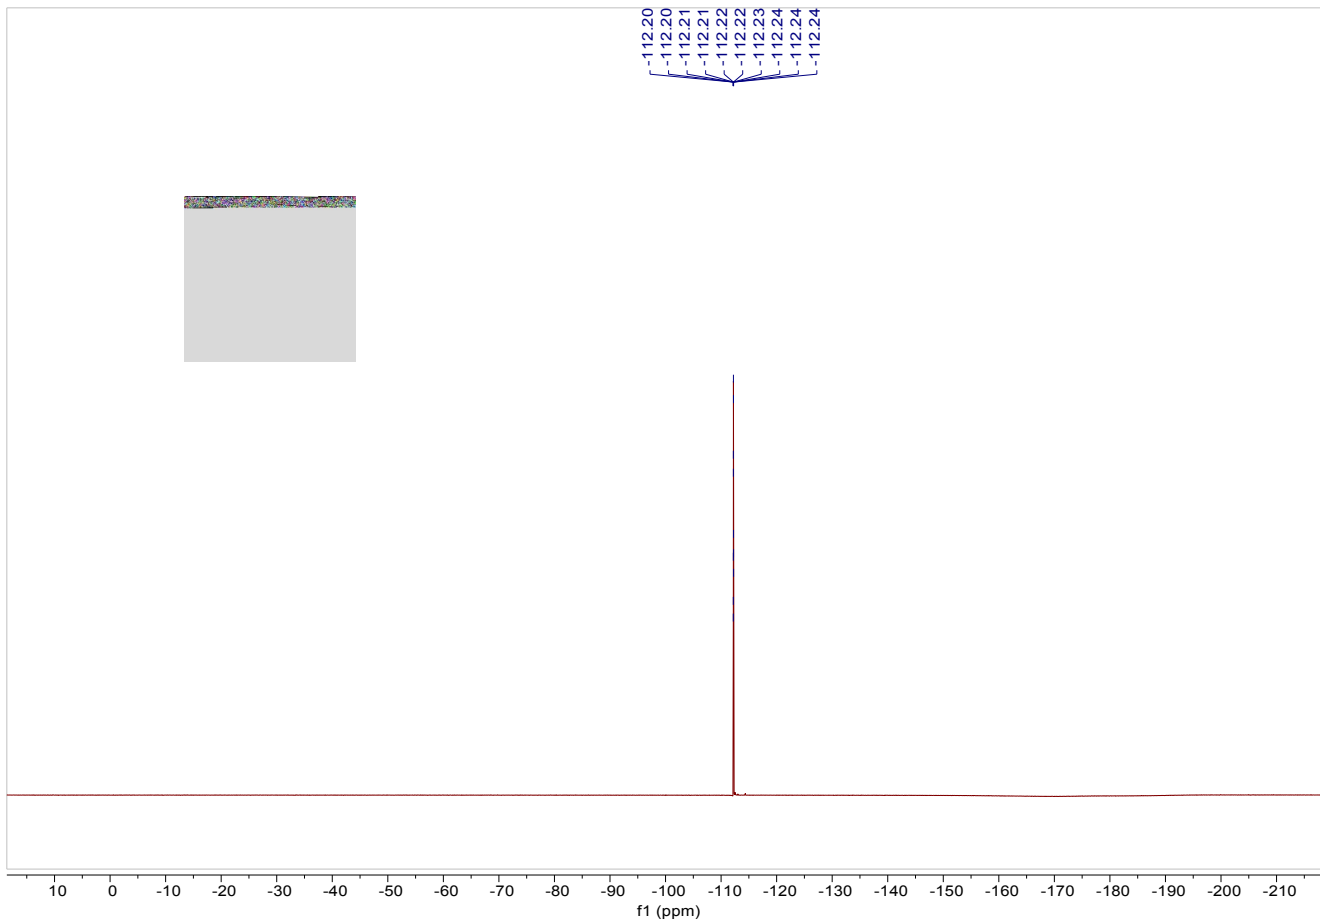



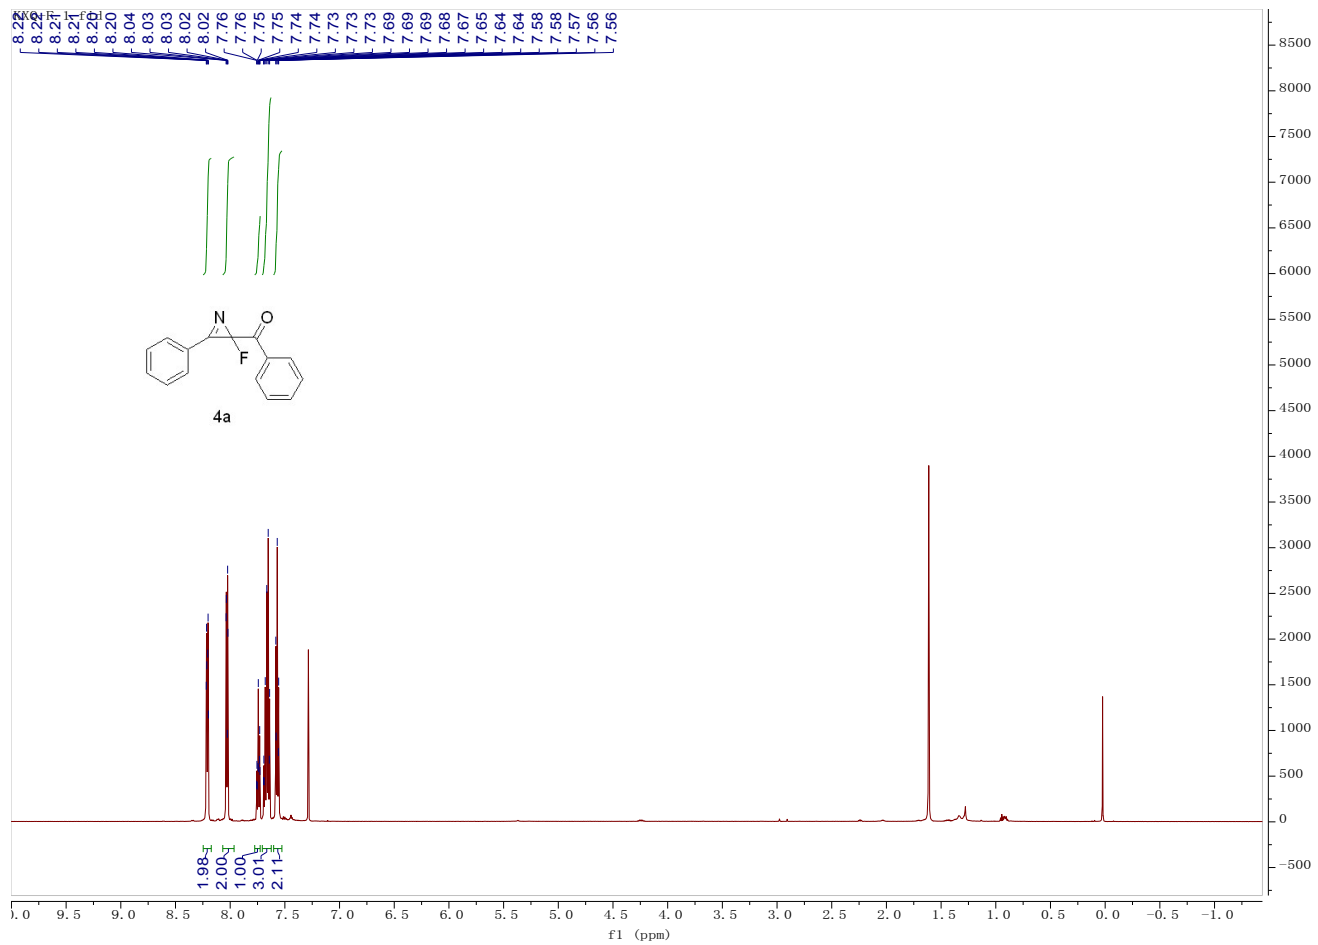

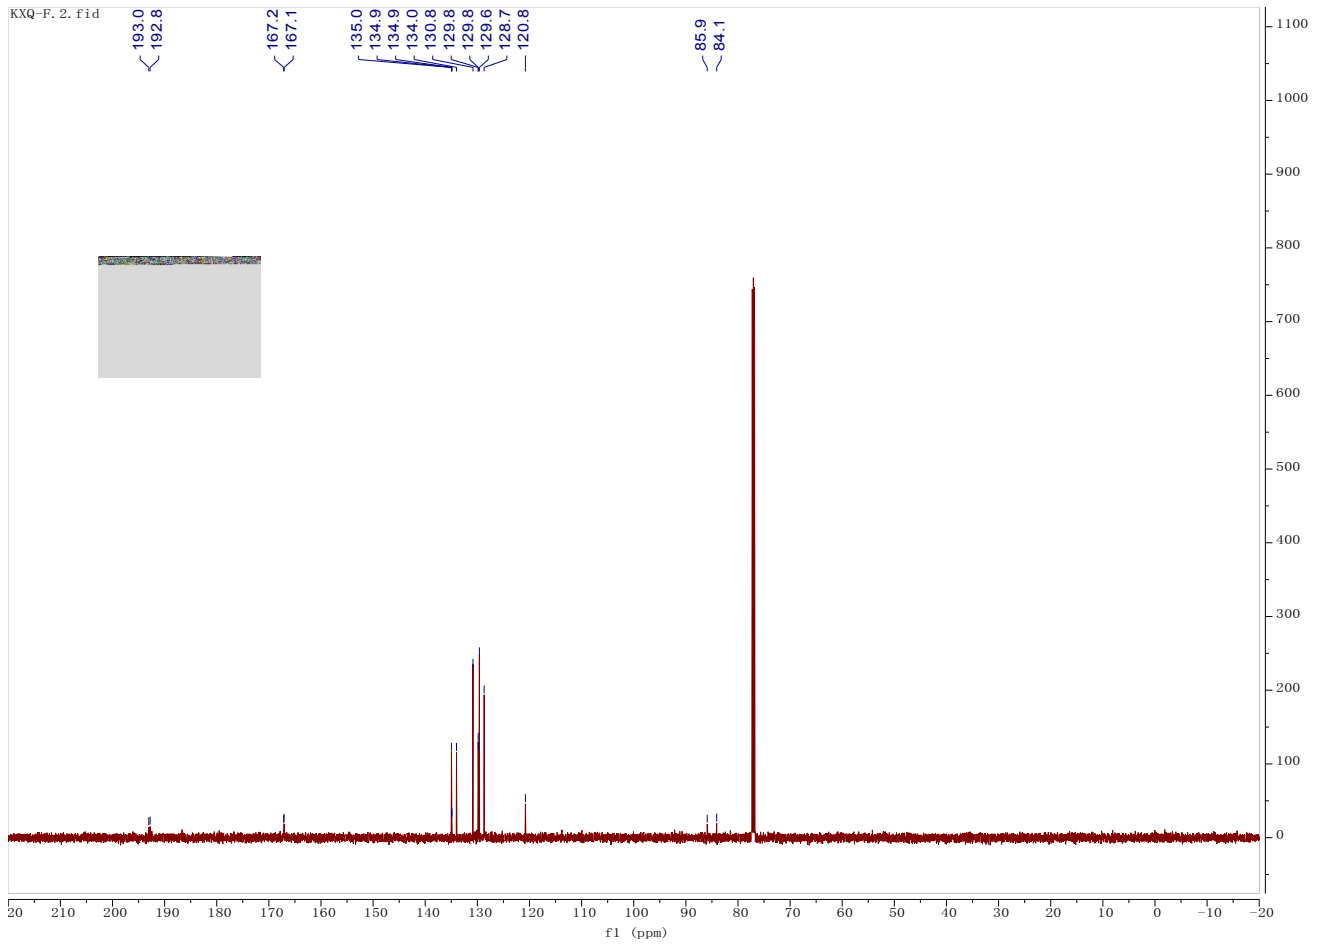

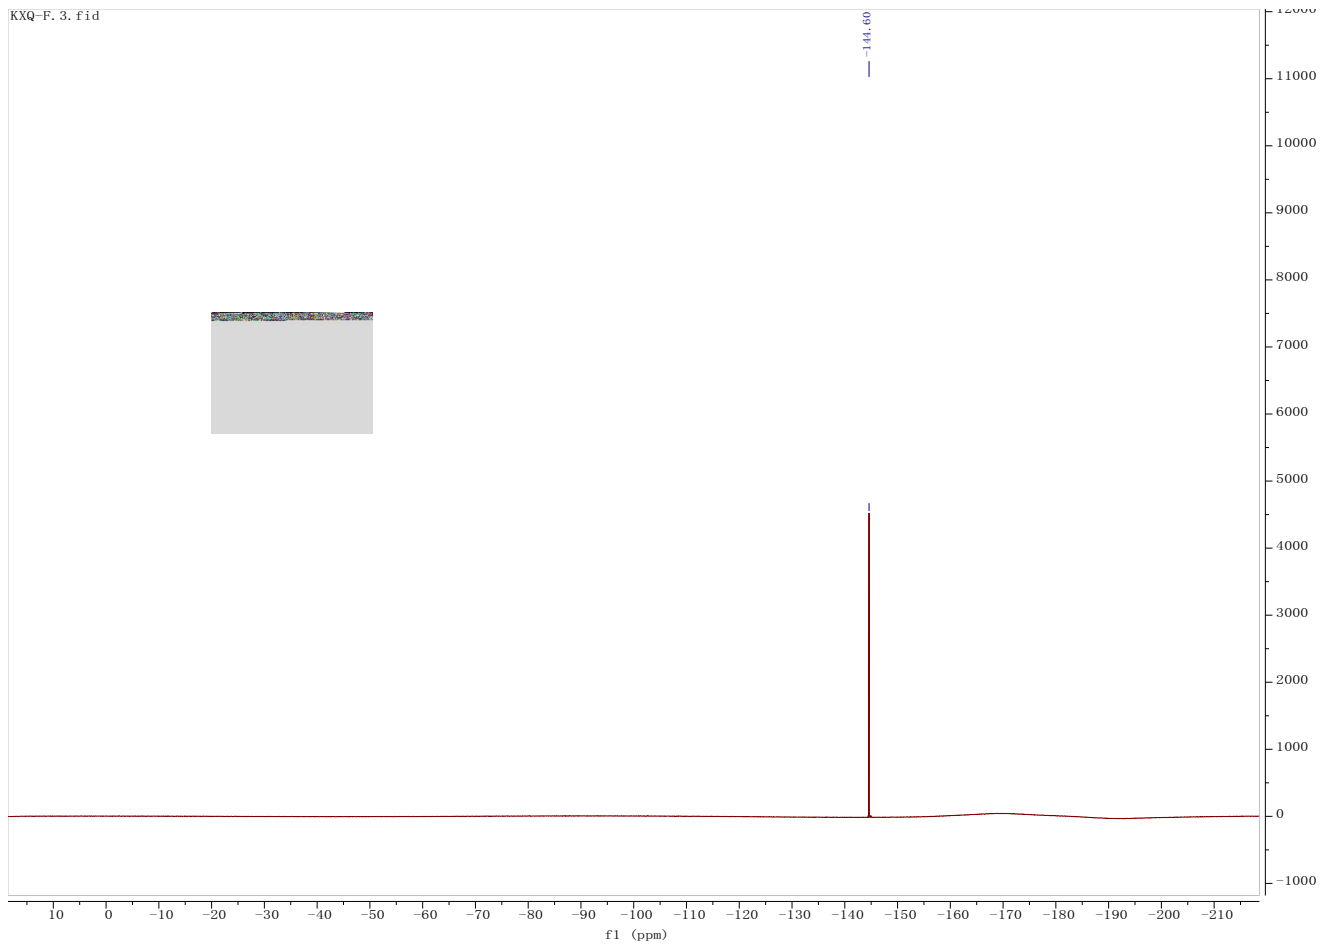

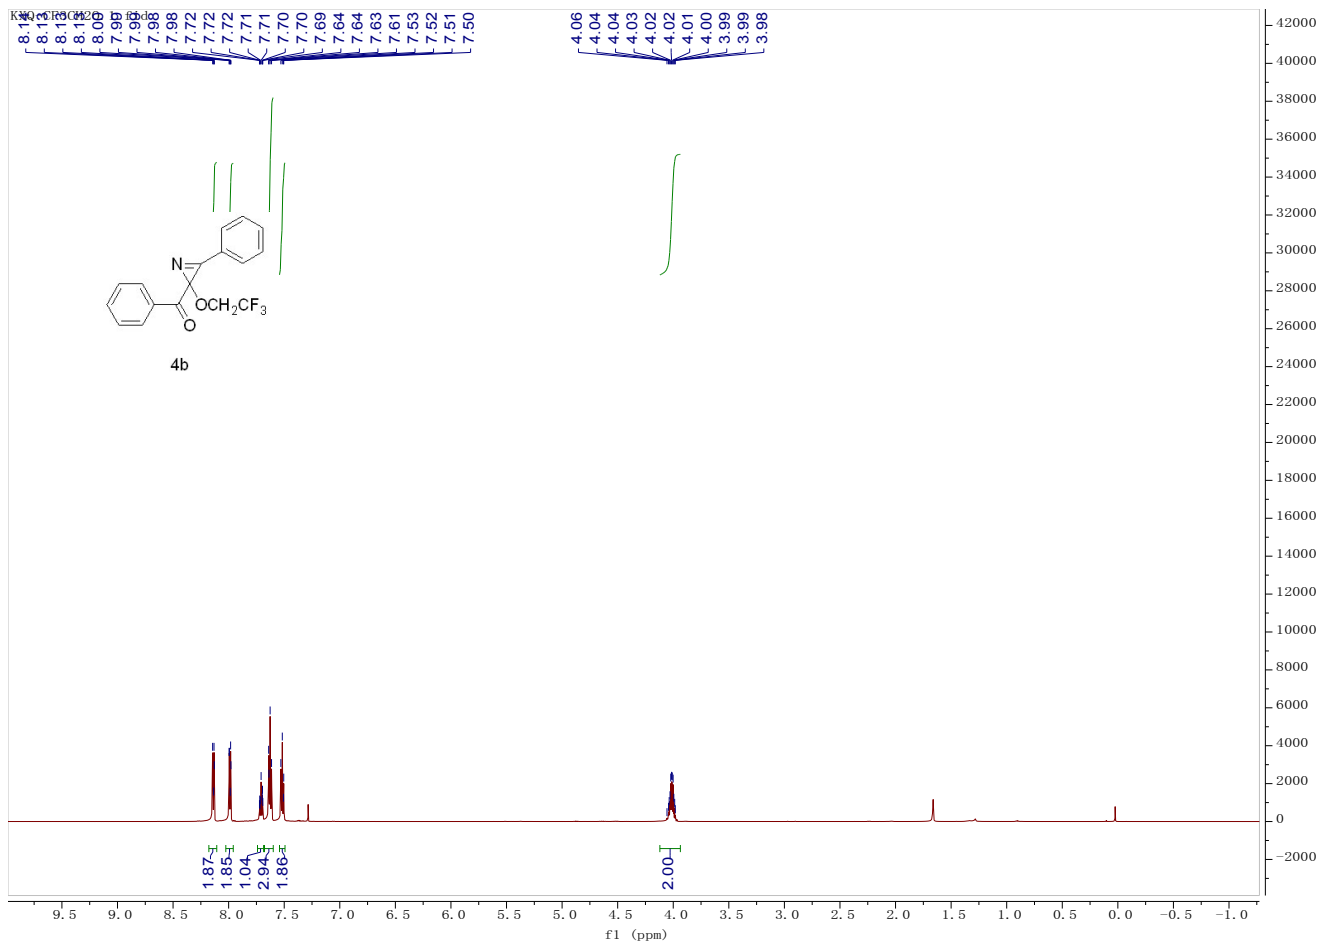

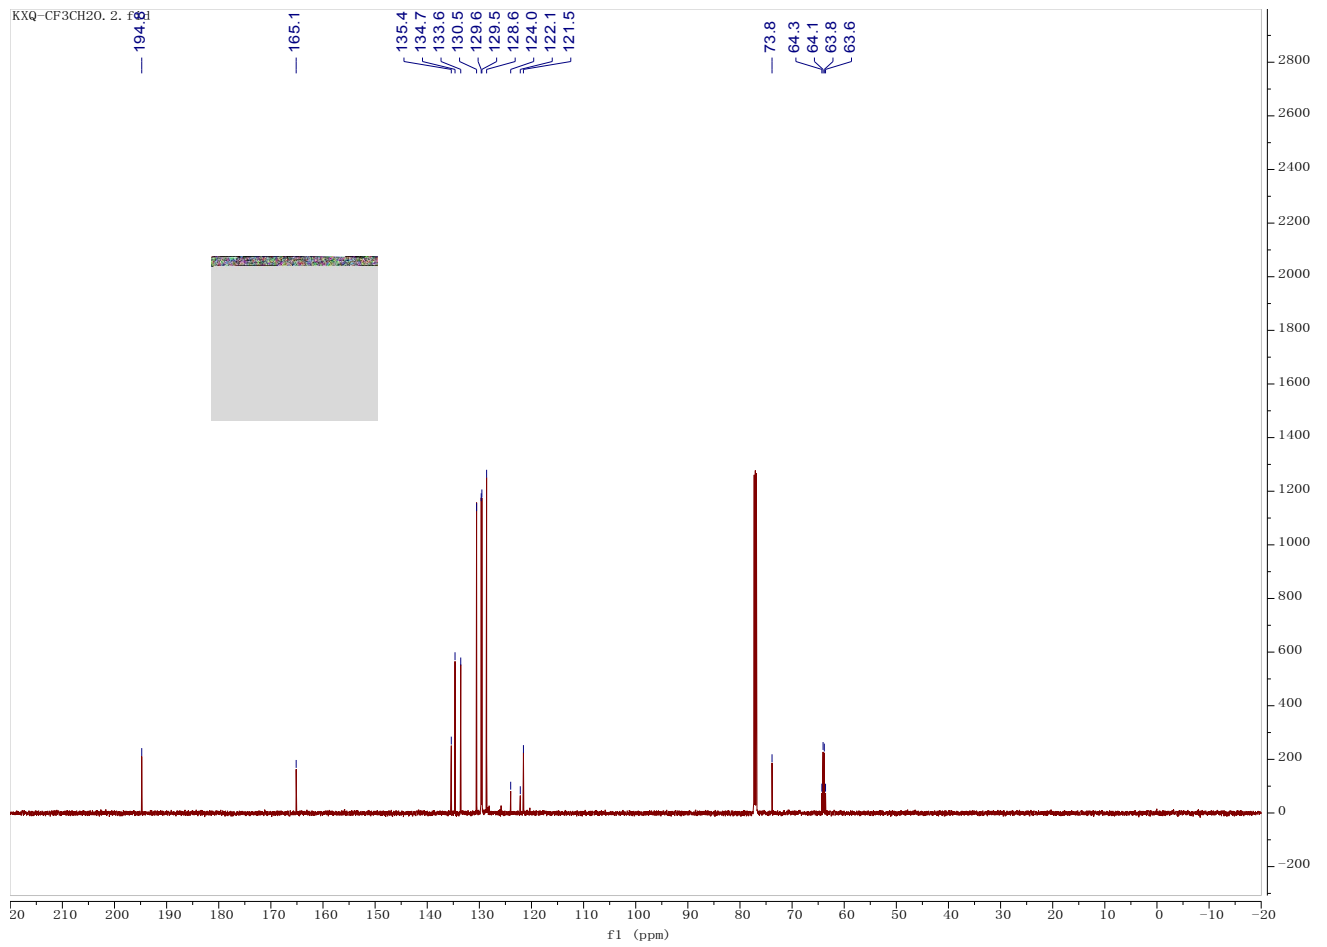

KXQ-CF3CH2O. 3. fid

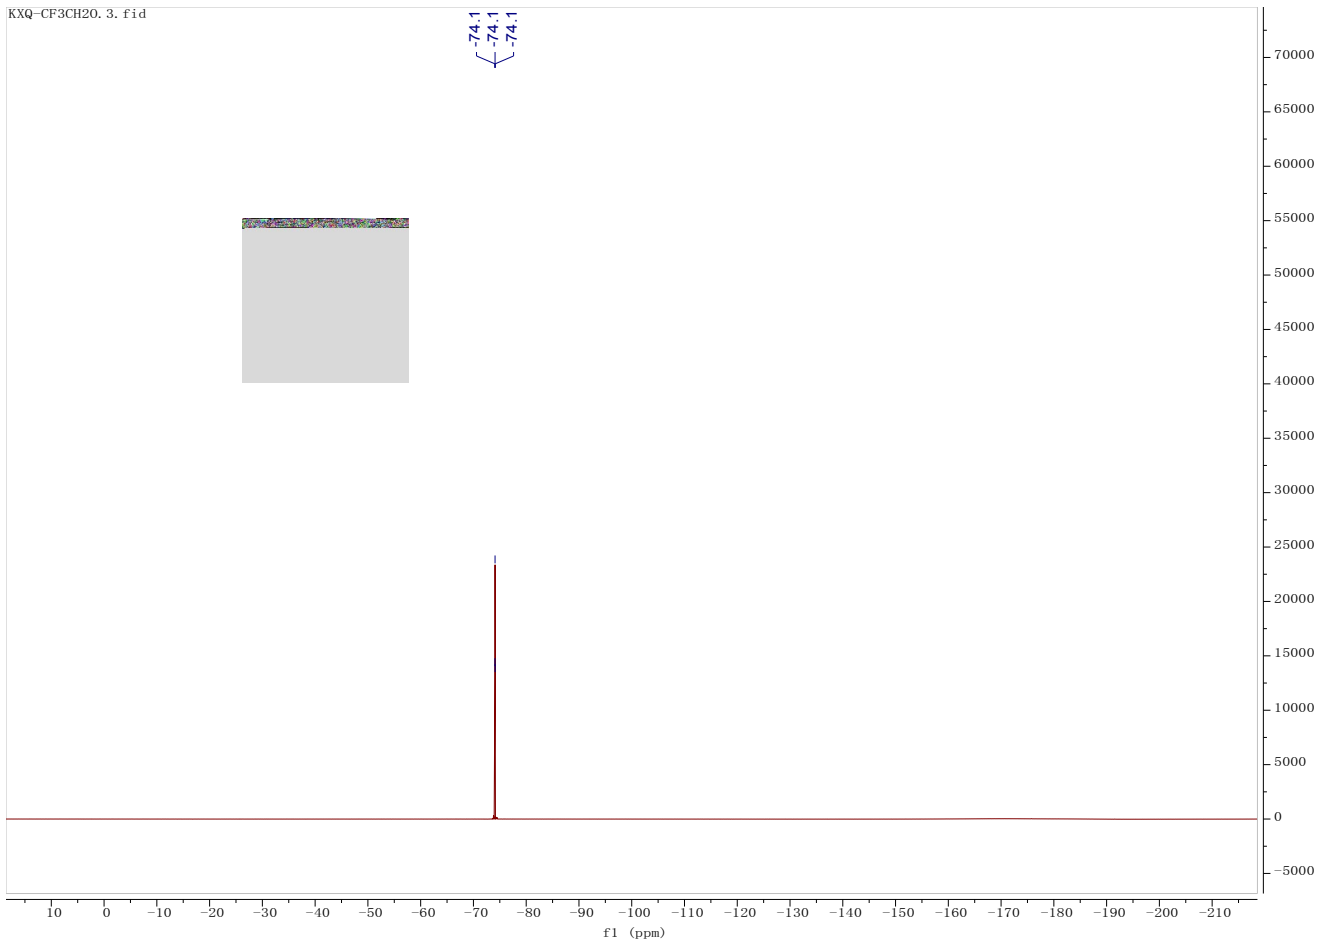



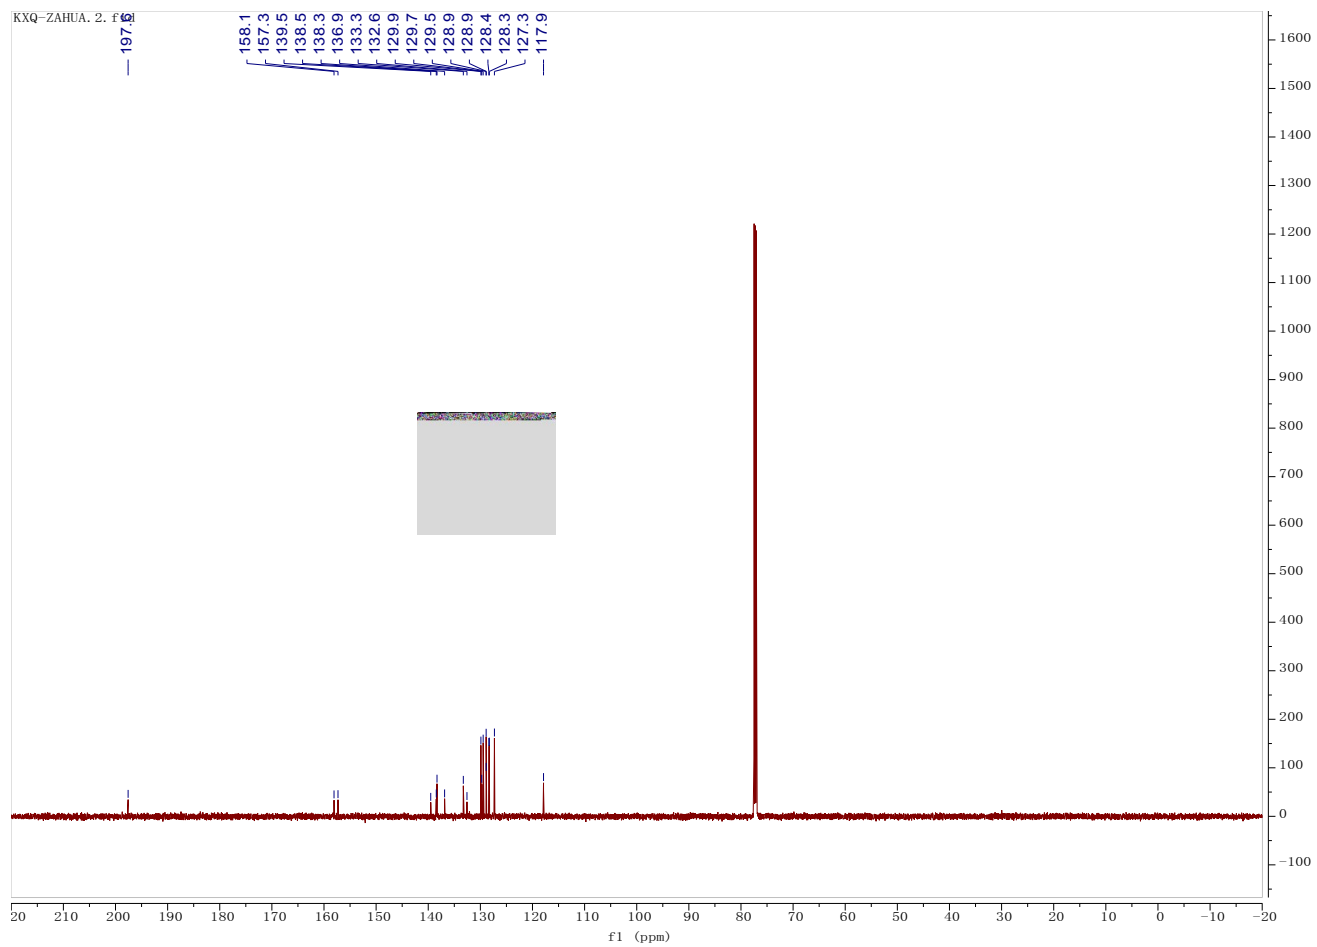



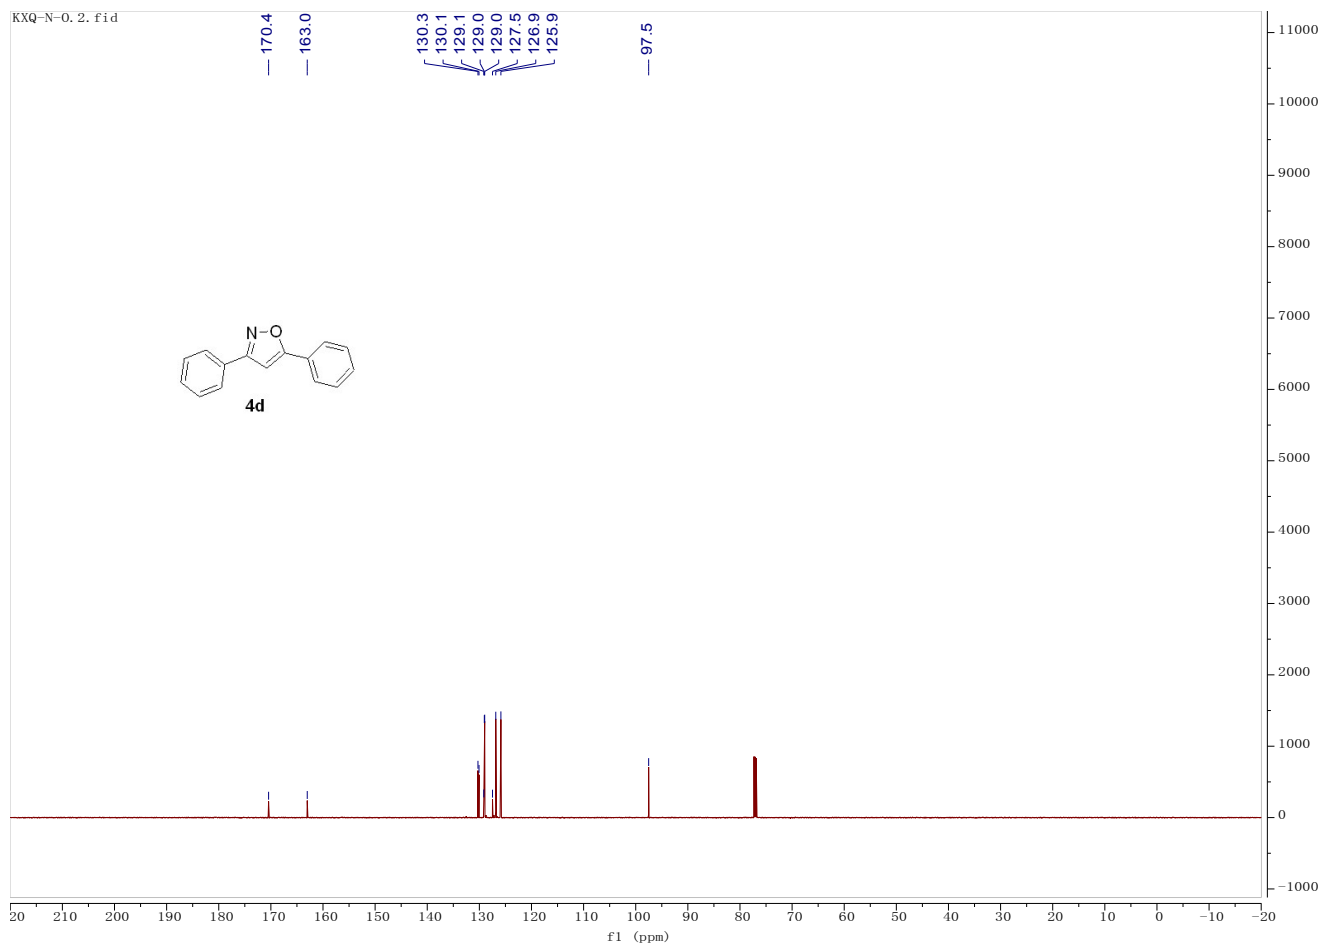

Supplement: c9gc01098j1.pdf [file c9gc01098j1.pdf]
